# Supplementary material for: Quantitative disease risk scores from EHR with applications to clinical risk stratification and genetic studies
Source: PubMed Central journal article supplement (PMC8302667; doi:10.1038/s41746-021-00488-3), 2021-07-23
Supplement: 41746_2021_488_MOESM1_ESM.pdf [file 41746_2021_488_MOESM1_ESM.pdf]

## Supplementary Materials

### Quantitative disease risk scores from EHR with applications to clinical risk stratification and genetic studies

Danqing Xu<sup>1</sup>, Chen Wang<sup>1,2,\*</sup>, Atlas Khan<sup>2,\*</sup>, Ning Shang<sup>2</sup>, Zihuai He<sup>3,4</sup>, Adam Gordon<sup>5</sup>,  
Iftikhar J. Kullo<sup>6</sup>, Shawn Murphy<sup>7,8</sup>, Yizhao Ni<sup>9</sup>, Wei-Qi Wei<sup>10</sup>, Ali Gharavi<sup>2</sup>, Krzysztof Kiryluk<sup>2</sup>,  
Chunhua Weng<sup>11,†</sup>, Iuliana Ionita-Laza<sup>1,†</sup>

<sup>1</sup> Department of Biostatistics, Columbia University, New York, NY, USA

<sup>2</sup> Division of Nephrology, Department of Medicine, Columbia University, New York, NY, USA

<sup>3</sup> Department of Neurology and Neurological Sciences, Stanford University, Stanford, CA 94305, USA

<sup>4</sup> Quantitative Sciences Unit, Department of Medicine, Stanford University, Stanford, CA, 94305, USA

<sup>5</sup> Department of Pharmacology and Center for Genetic Medicine, Northwestern University, Chicago, IL,  
USA

<sup>6</sup> Department of Cardiovascular Medicine, Mayo Clinic, Rochester, MN, USA

<sup>7</sup> Department of Biomedical Informatics, Harvard Medical School, Boston, MA, USA

<sup>8</sup> Research Information Science and Computing, Mass General Brigham, Boston, MA, USA

<sup>9</sup> Division of Biomedical Informatics, Cincinnati Children's Hospital Medical Center, Cincinnati, OH, USA

<sup>10</sup> Department of Biomedical Informatics, Vanderbilt University, Nashville, TN, USA

<sup>11</sup> Department of Biomedical Informatics, Columbia University, New York, NY, USA

\* contributed equally to this work

† contributed equally to this work

## Supplementary Figures

Boxplots are drawn to display variation and distribution of the quantitative disease risk scores. For the boxplots appear hereafter, the elements are defined as the following: the center line, lower and upper bounds of box represent the median, first quartile ( $Q_1$ , or 25<sup>th</sup> percentile), and third quartile ( $Q_3$ , or 75<sup>th</sup> percentile) of the data, respectively. The whisker is drawn up (down) to the largest (smallest) observed point from the data that falls within 1.5 times the interquartile range ( $= Q_3 - Q_1$ ) above (below) the  $Q_3$  ( $Q_1$ ).

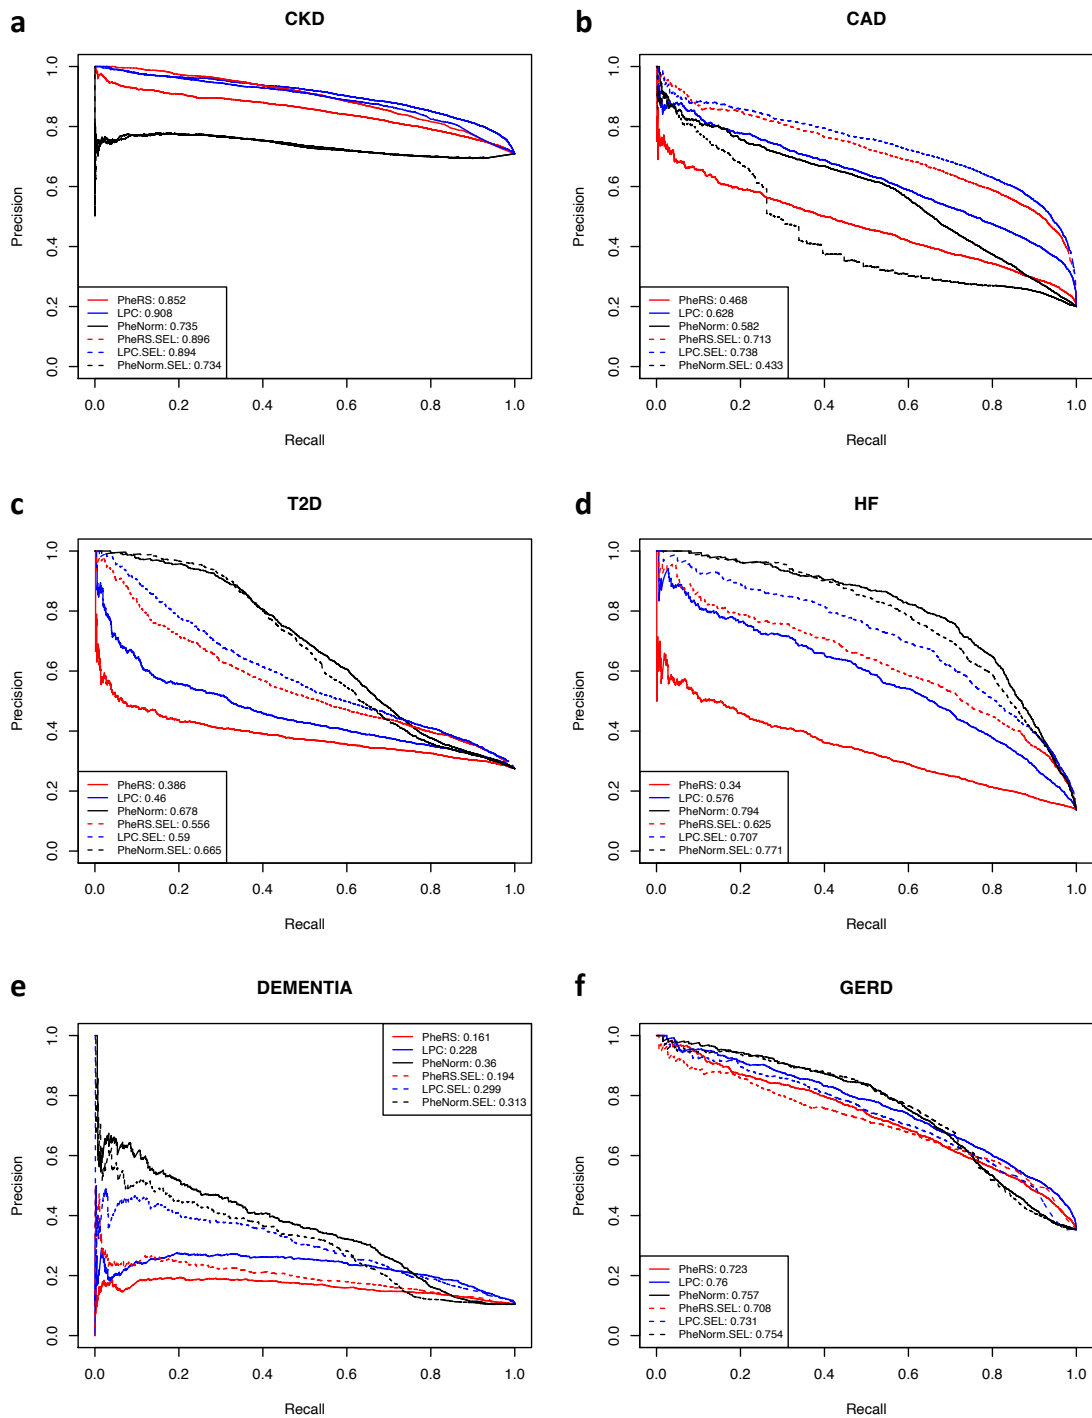

Supplementary Figure 1: **PR curves cases vs. controls for six phenotypes.** PR curves of six quantitative disease risk scores along with their AUPRCs for **a** CKD (cases including G1, G2, G3a/b, and G4 stages), **b** CAD, **c** T2D, **d** HF, **e** Dementia, and **f** GERD. Quantitative disease risk scores are derived based on all phecodes (PheRS, LPC, PheNorm), or pre-selected feature phecodes (PheRS.SEL, LPC.SEL, PheNorm.SEL).

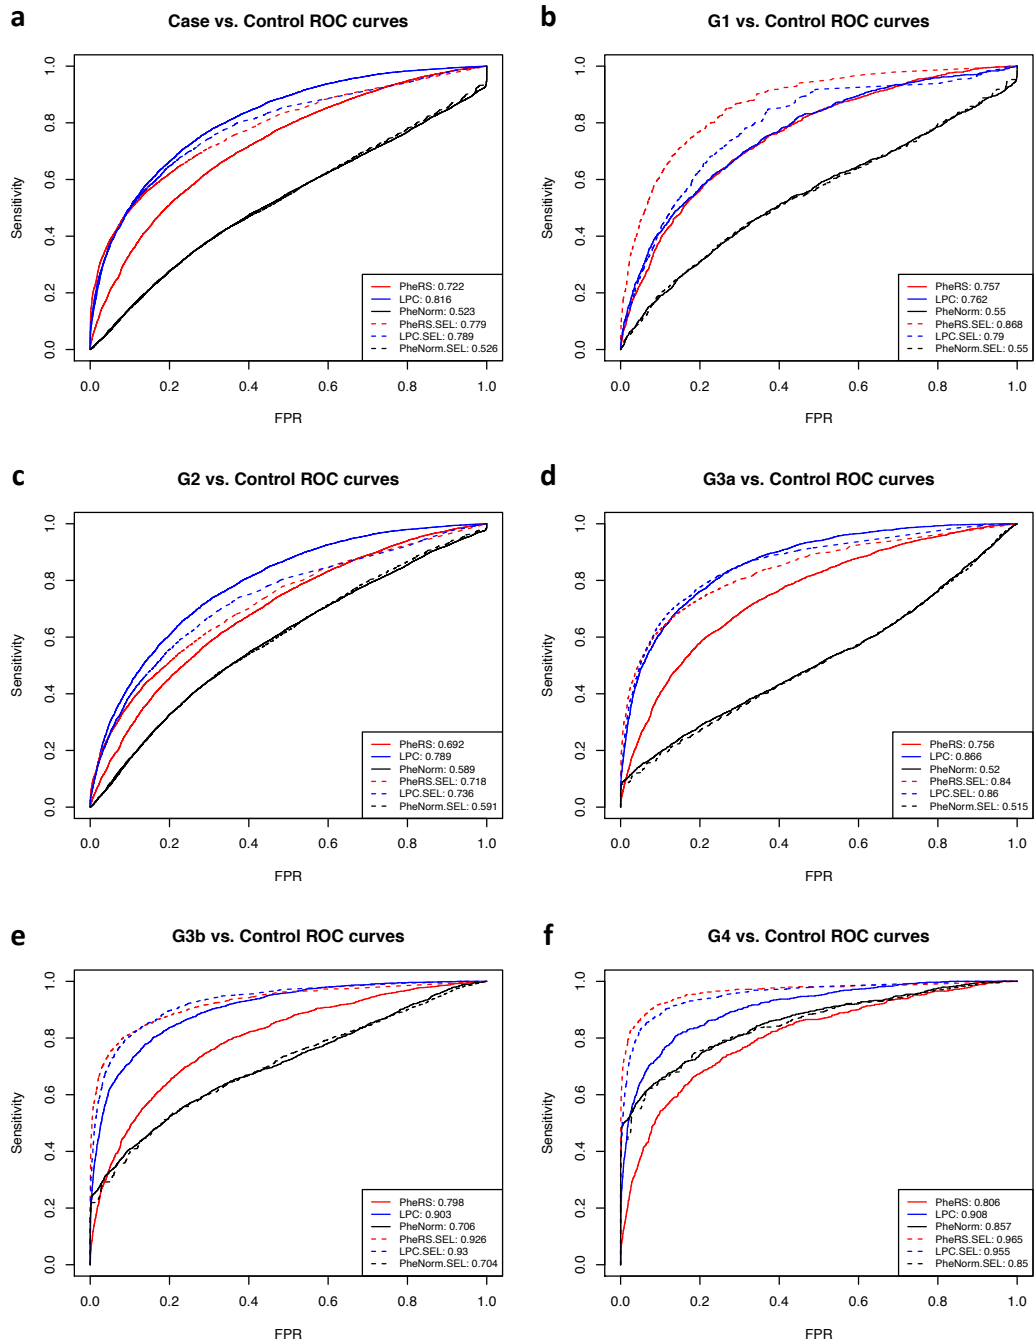

Supplementary Figure 2: **ROC curves for CKD cases vs. controls, and CKD cases at different G stages vs. controls.** ROC curves of six quantitative disease risk scores along with their AUROCs for **a** CKD cases (cases G1, G2, G3a/b, and G4 stages), **b** CKD G1, **c** CKD G2, **d** CKD G3a, **e** CKD G3b, and **f** CKD G4b. Quantitative disease risk scores are derived based on all phecodes (PheRS, LPC, PheNorm), or pre-selected feature phecodes (PheRS.SEL, LPC.SEL, PheNorm.SEL).



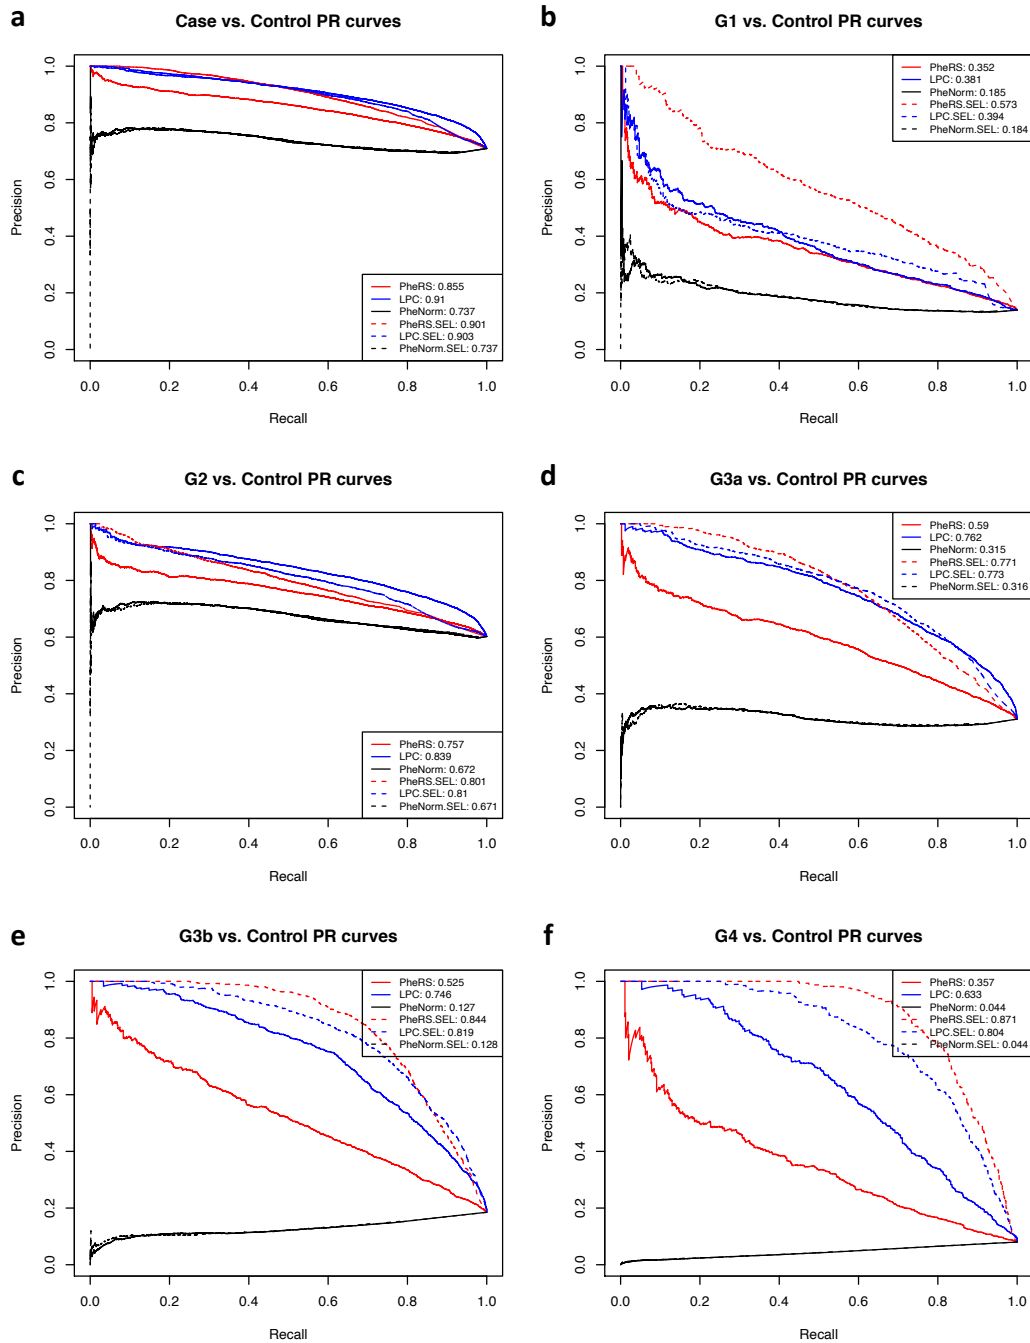

Supplementary Figure 3: **PR curves for CKD cases vs. controls, and CKD cases at different G stages vs. controls.** PR curves of six quantitative disease risk scores along with their AUPRCs for **a** CKD cases (cases G1, G2, G3a/b, and G4 stages), **b** CKD G1, **c** CKD G2, **d** CKD G3a, **e** CKD G3b, and **f** CKD G4b. Quantitative disease risk scores are derived based on all phecodes (PheRS, LPC, PheNorm), or pre-selected feature phecodes (PheRS.SEL, LPC.SEL, PheNorm.SEL).

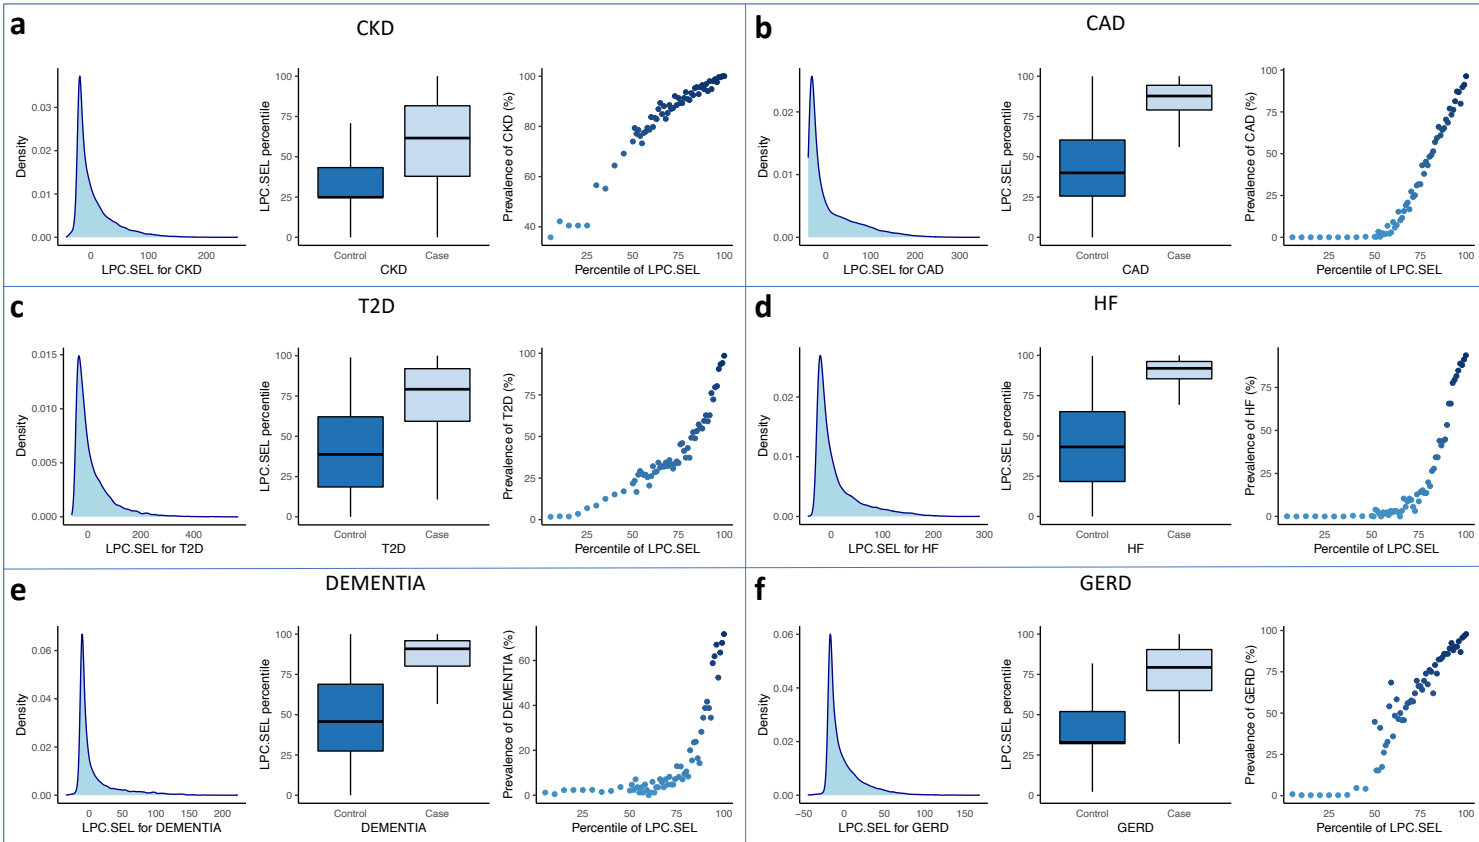

Supplementary Figure 4: **Distribution of final LPC scores for six phenotypes in the test set.** LPC risk scores are derived based on selected phecodes. Estimated density and distribution of LPC risk scores cases vs. controls for **a** CKD (cases including G1, G2, G3a/b, and G4 stages), **b** CAD, **c** T2D, **d** HF, **e** Dementia, and **f** GERD. For each phenotype: Left, distribution of LPC risk scores in the test set. Middle, LPC risk score percentiles among cases vs. controls. Right, case prevalence in 60 bins according to the percentiles of LPC risk scores.

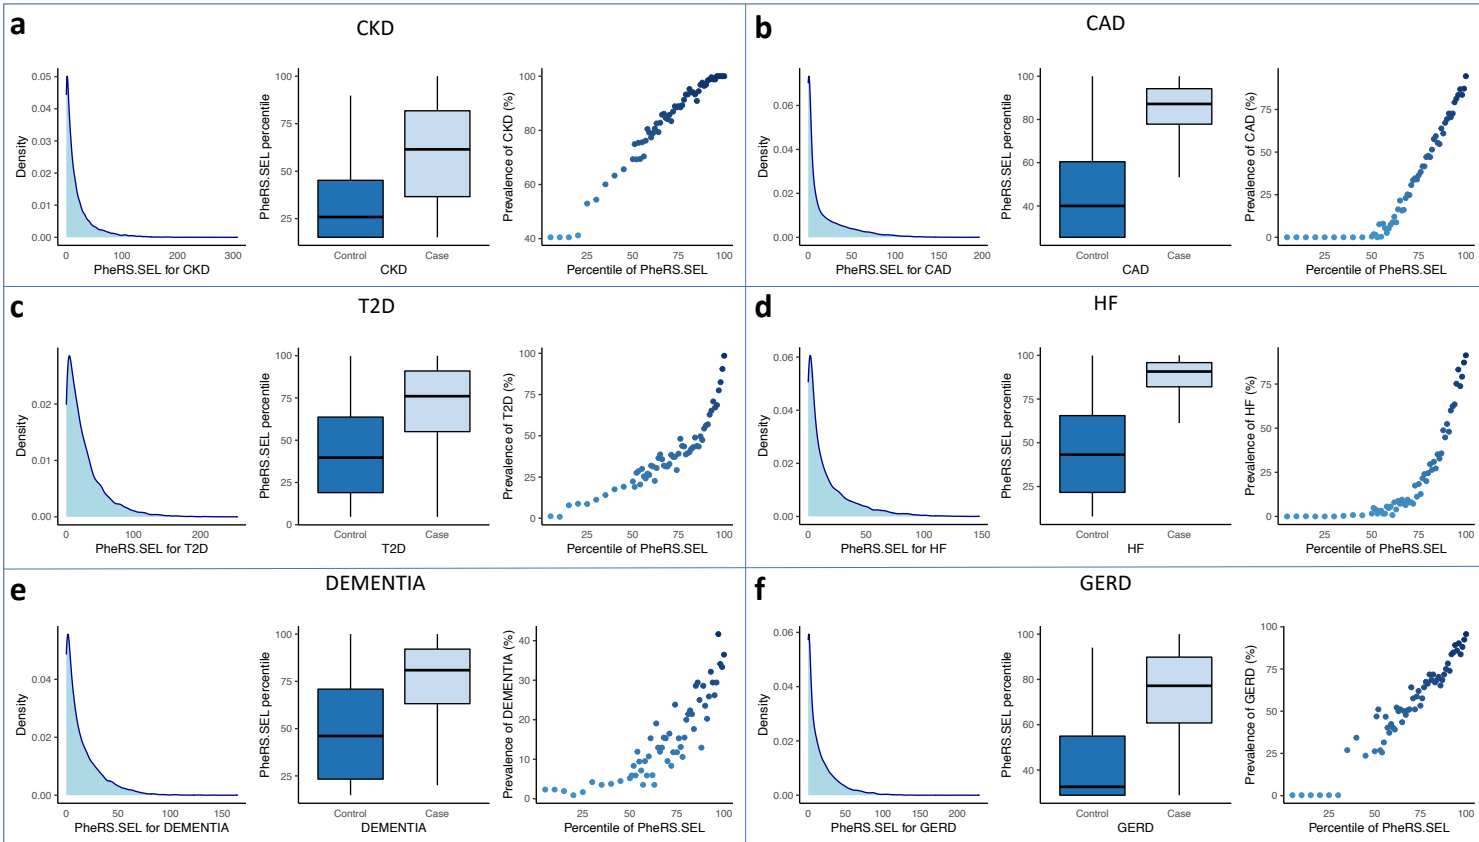

Supplementary Figure 5: **Distribution of PheRS scores for six phenotypes in the test set.** PheRS risk scores are derived based on selected phecodes. Estimated density and distribution of PheRS risk scores cases vs. controls for **a** CKD (cases including G1, G2, G3a/b, and G4 stages), **b** CAD, **c** T2D, **d** HF, **e** Dementia, and **f** GERD. For each phenotype: Left, distribution of PheRS in the test set. Middle, PheRS percentiles among cases vs. controls. Right, prevalence of phenotype in 60 bins according to the percentiles of PheRS.

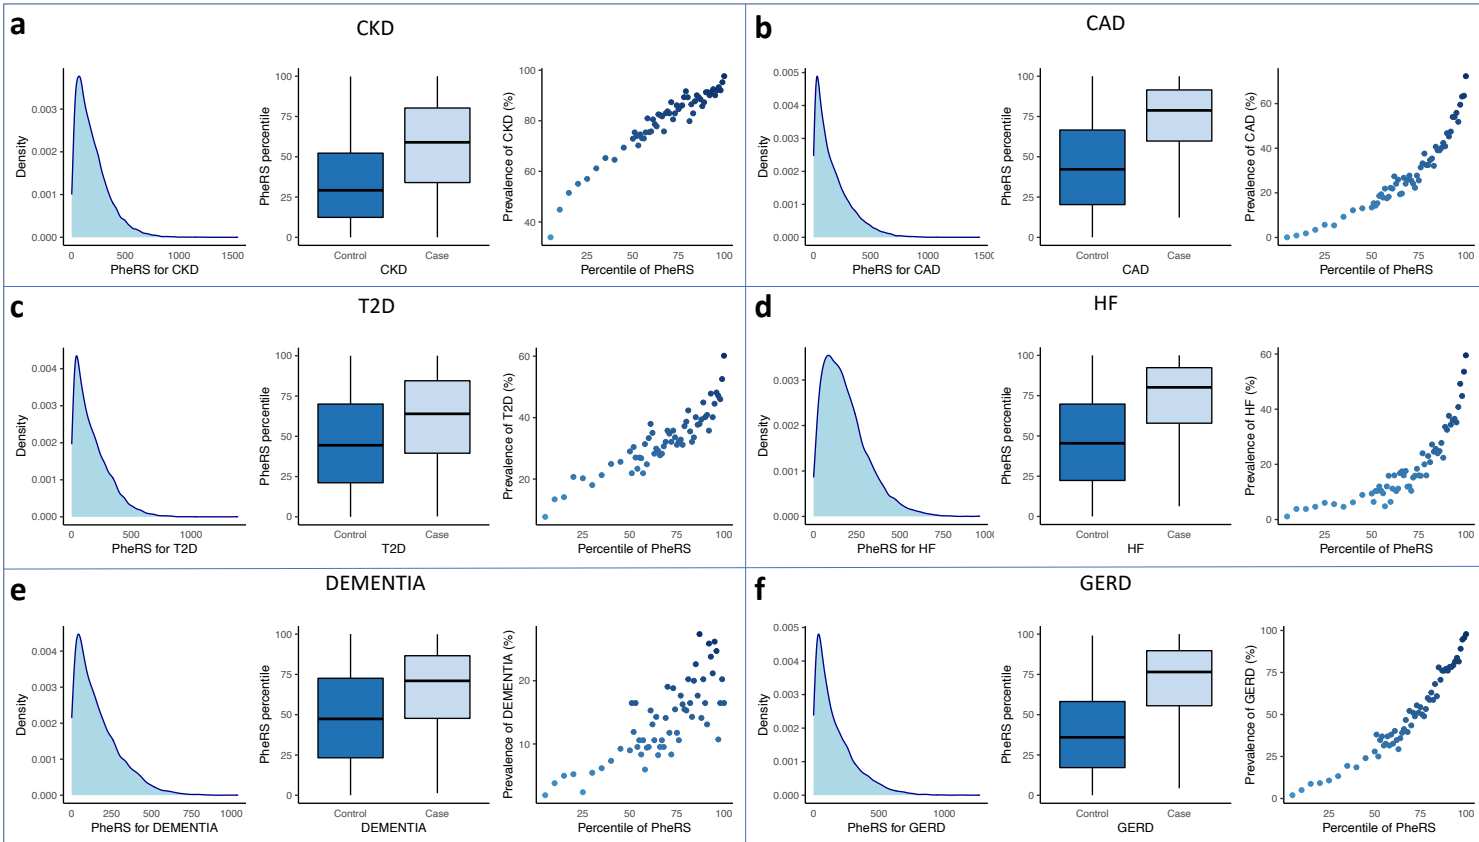

Supplementary Figure 6: **Distribution of PheRS scores for six phenotypes in the test set.** PheRS risk scores are derived based on **all** phecodes. Estimated density and distribution of PheRS risk scores cases vs. controls for **a** CKD (cases including G1, G2, G3a/b, and G4 stages), **b** CAD, **c** T2D, **d** HF, **e** Dementia, and **f** GERD. For each phenotype: Left, distribution of PheRS in the test set. Middle, PheRS percentiles among cases vs. controls. Right, prevalence of phenotype in 60 bins according to the percentiles of PheRS.

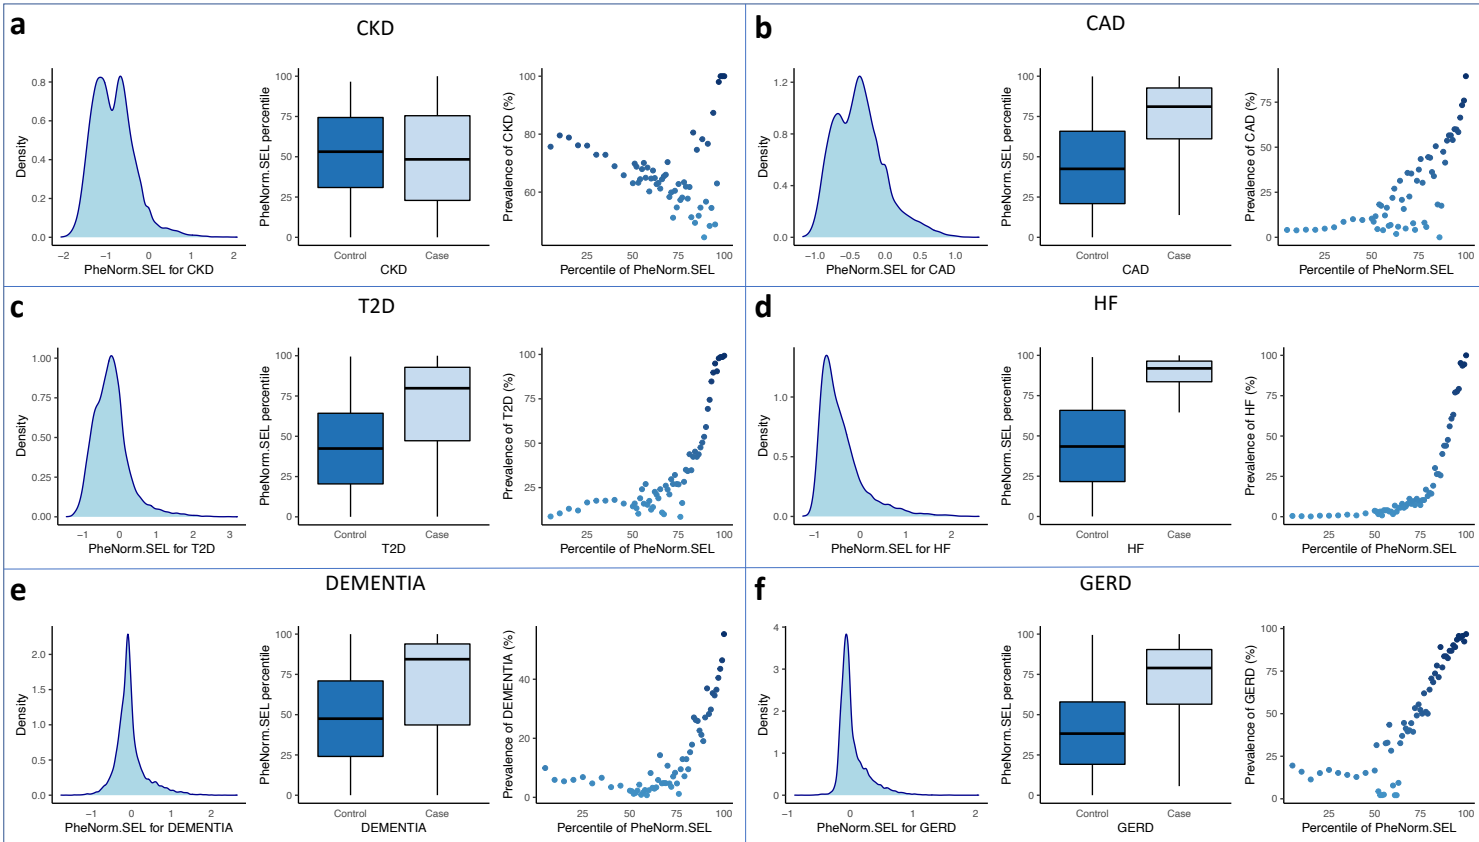

Supplementary Figure 7: **Distribution of PheNorm scores for six phenotypes in the test set.** PheNorm risk scores are derived based on selected phecodes. Estimated density and distribution of PheNorm risk scores cases vs. controls for **a** CKD (cases including G1, G2, G3a/b, and G4 stages), **b** CAD, **c** T2D, **d** HF, **e** Dementia, and **f** GERD. For each phenotype: Left, distribution of PheNorm in the test set. Middle, PheNorm percentiles among cases vs. controls. Right, prevalence of phenotype in 60 bins according to the percentiles of PheNorm.

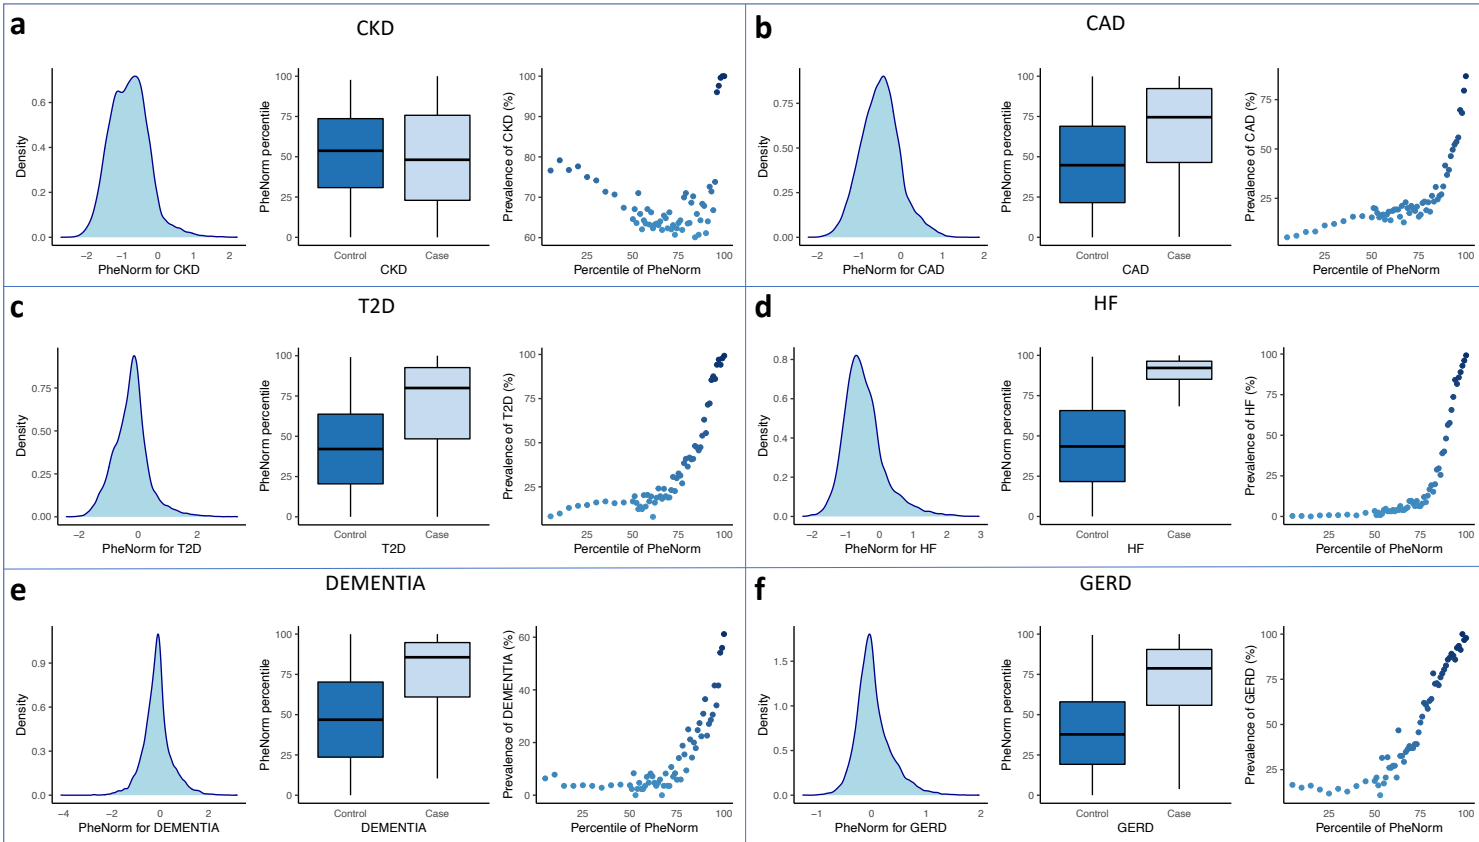

Supplementary Figure 8: **Distribution of PheNorm scores for six phenotypes in the test set.** PheNorm risk scores are derived based on **all** phecodes. Estimated density and distribution of PheNorm risk scores cases vs. controls for **a** CKD (cases including G1, G2, G3a/b, and G4 stages), **b** CAD, **c** T2D, **d** HF, **e** Dementia, and **f** GERD. For each phenotype: Left, distribution of PheNorm in the test set. Middle, PheNorm percentiles among cases vs. controls. Right, prevalence of phenotype in 60 bins according to the percentiles of PheNorm.

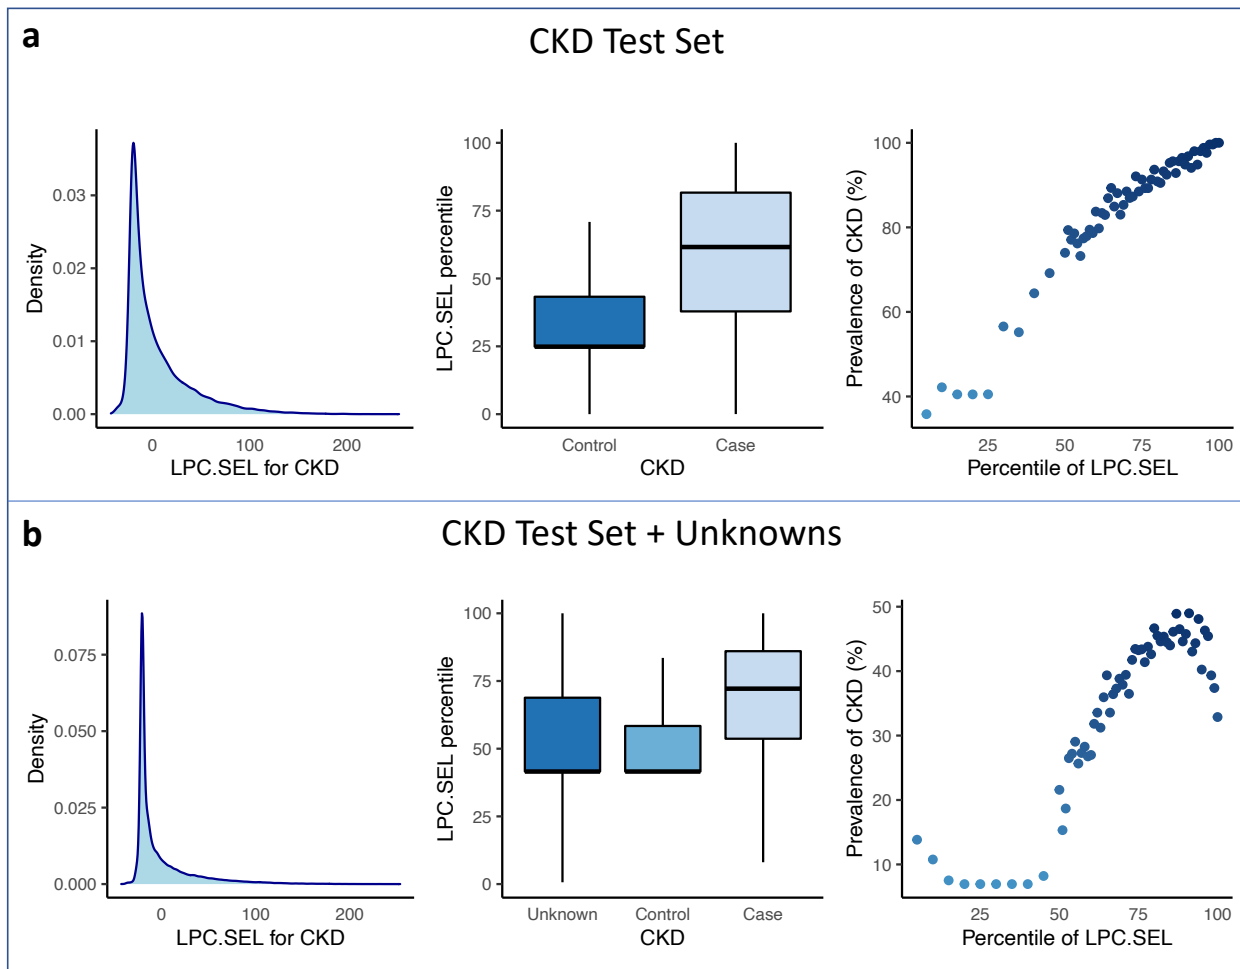

Supplementary Figure 9: **Distribution of CKD LPC risk scores in the test set vs. test set + individuals with unknown status.** Estimated density and distribution of LPC risk scores, **a** cases vs. controls in CKD test set, and **b** cases vs. controls vs. unknowns in CKD test set and individuals with unknown status. LPC risk scores are derived based on **pre-selected** phecodes. Left, distribution of LPC risk scores. Middle, LPC risk score percentiles among cases vs. controls. Right, prevalence of phenotype in 60 bins according to the percentiles of LPC risk scores.

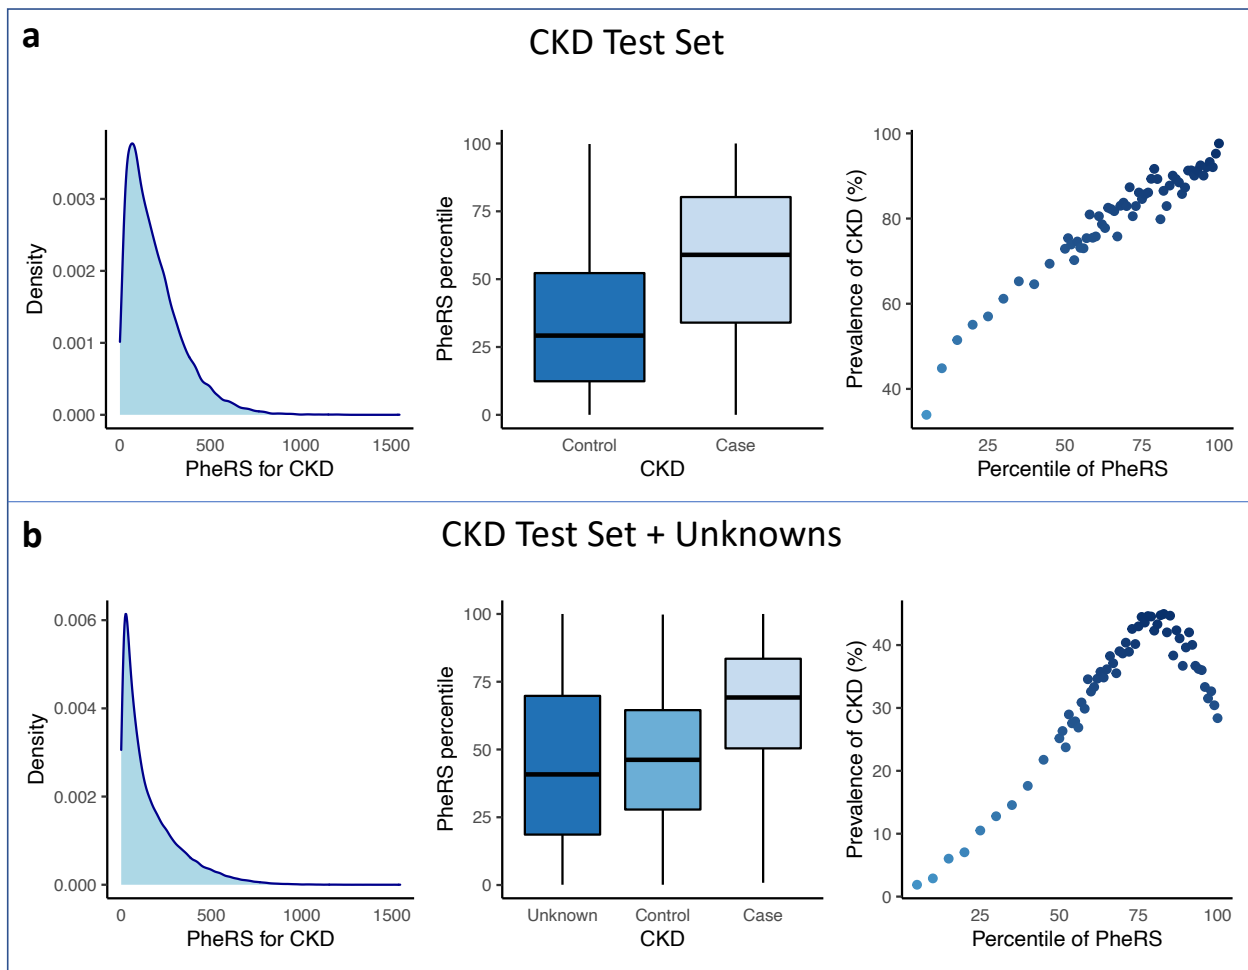

Supplementary Figure 10: **Distribution of CKD PheRS risk scores in the test set vs. test set + individuals with unknown status.** Estimated density and distribution of PheRS risk scores, **a** cases vs. controls in CKD test set, and **b** cases vs. controls vs. unknowns in CKD test set and individuals with unknown status. PheRS risk scores are derived based on **all** phecodes. Left, distribution of PheRS risk scores. Middle, PheRS risk score percentiles among cases vs. controls. Right, prevalence of phenotype in 60 bins according to the percentiles of PheRS risk scores.



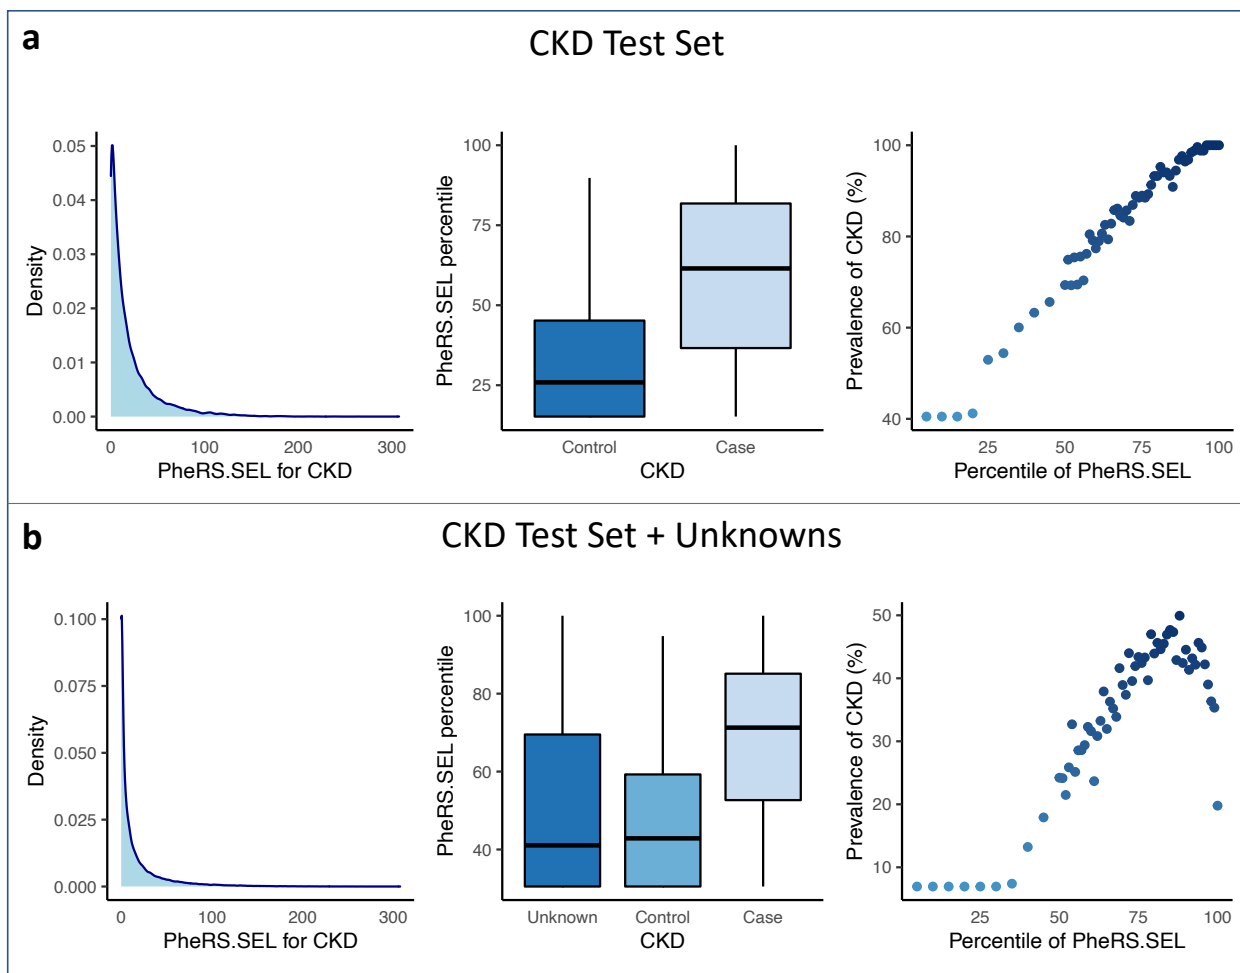

Supplementary Figure 11: **Distribution of CKD PheRS risk scores in the test set vs. test set + individuals with unknown status.** Estimated density and distribution of PheRS risk scores, **a** cases vs. controls in CKD test set, and **b** cases vs. controls vs. unknowns in CKD test set and individuals with unknown status. PheRS risk scores are derived based on **pre-selected** phecodes. Left, distribution of PheRS risk scores. Middle, PheRS risk score percentiles among cases vs. controls. Right, prevalence of phenotype in 60 bins according to the percentiles of PheRS risk scores.

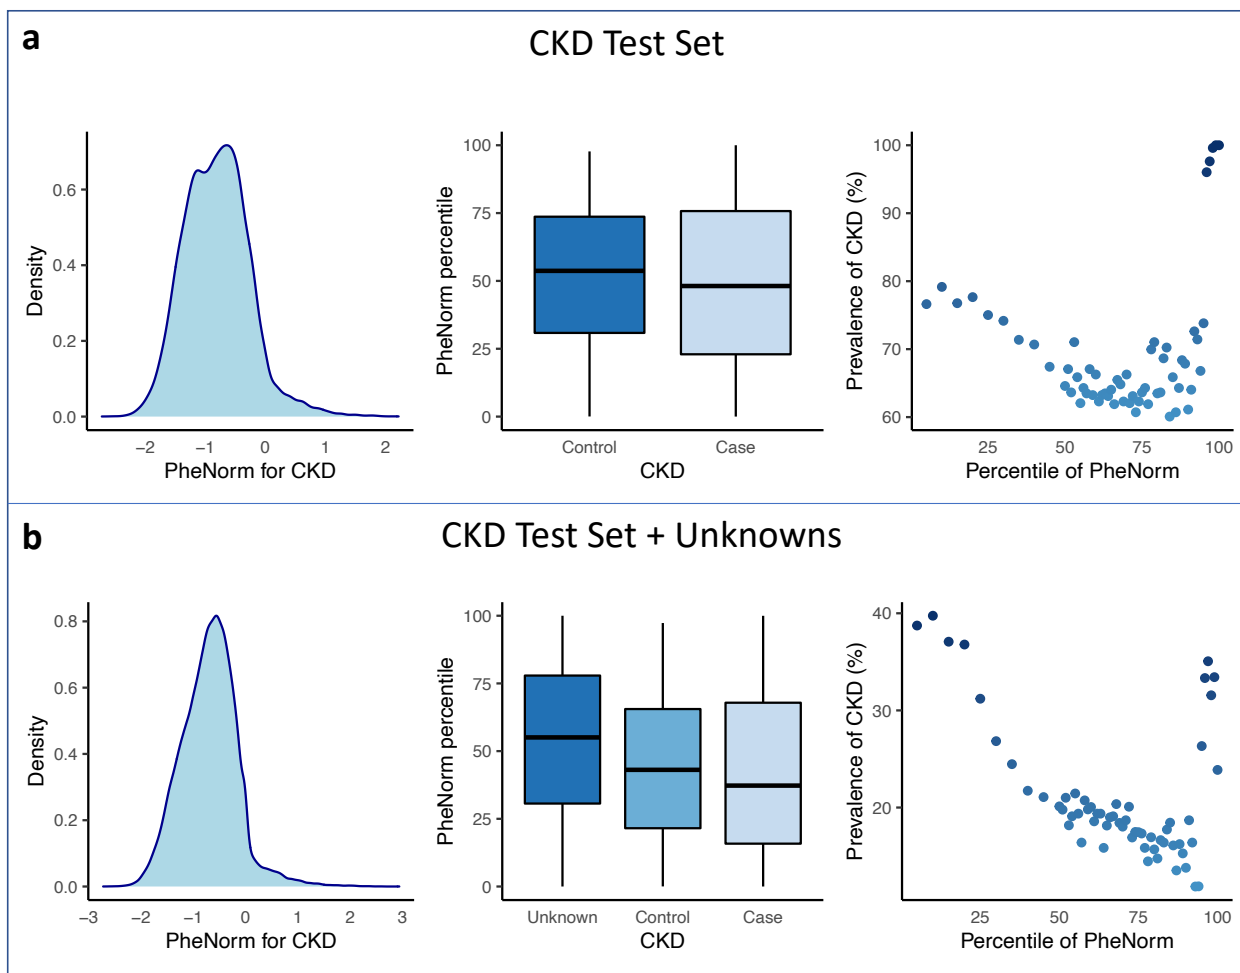

Supplementary Figure 12: **Distribution of CKD PheNorm risk scores in the test set vs. test set + individuals with unknown status.** Estimated density and distribution of PheNorm risk scores, **a** cases vs. controls in CKD test set, and **b** cases vs. controls vs. unknowns in CKD test set and individuals with unknown status. PheNorm risk scores are derived based on **all** phecodes. Left, distribution of PheNorm risk scores. Middle, PheNorm risk score percentiles among cases vs. controls. Right, prevalence of phenotype in 60 bins according to the percentiles of PheNorm risk scores.

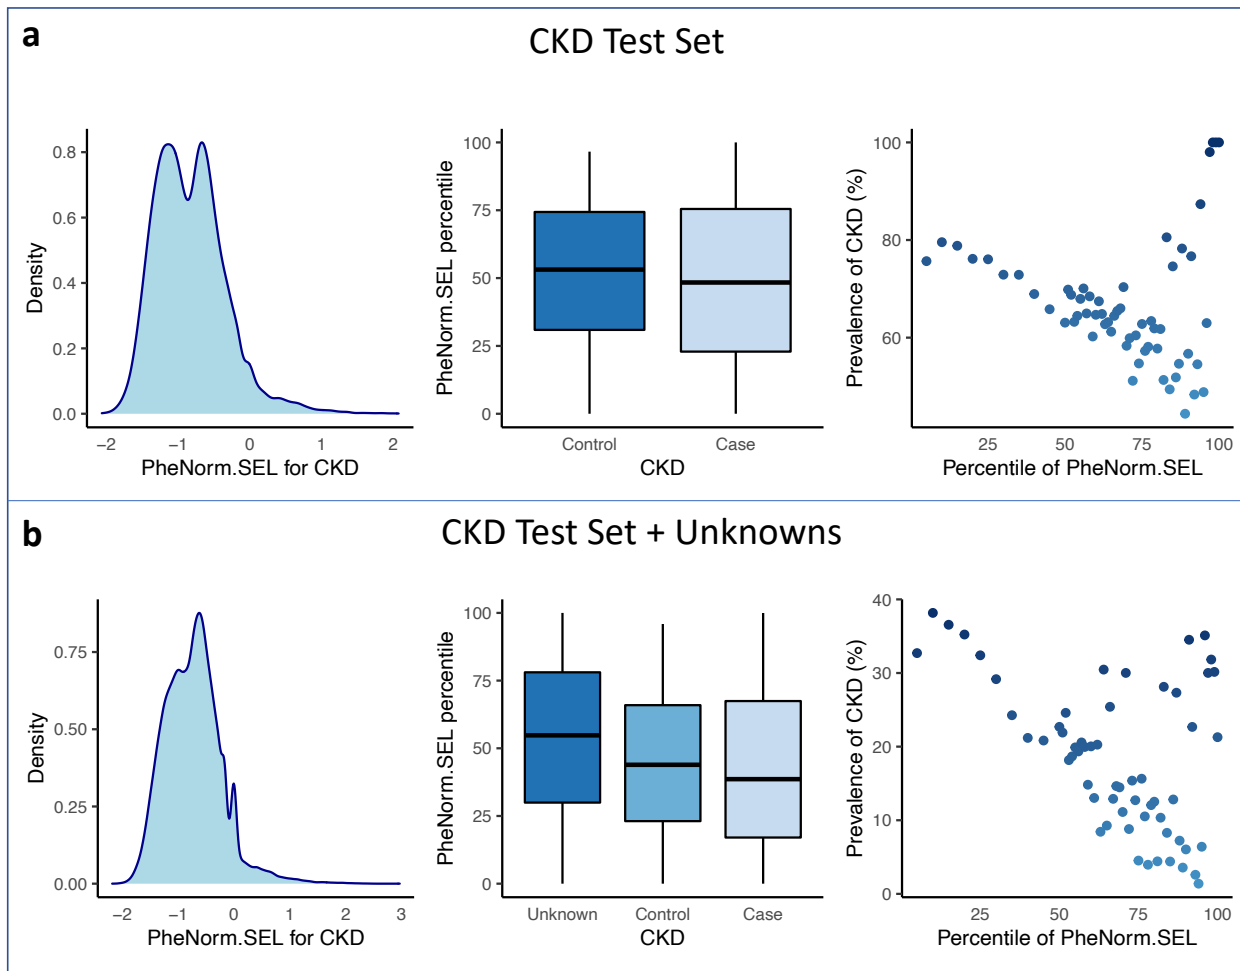

Supplementary Figure 13: **Distribution of CKD PheNorm risk scores in the test set vs. test set + individuals with unknown status.** Estimated density and distribution of PheNorm risk scores, **a** cases vs. controls in CKD test set, and **b** cases vs. controls vs. unknowns in CKD test set and individuals with unknown status. PheNorm risk scores are derived based on **pre-selected** phecodes. Left, distribution of PheNorm risk scores. Middle, PheNorm risk score percentiles among cases vs. controls. Right, prevalence of phenotype in 60 bins according to the percentiles of PheNorm risk scores.

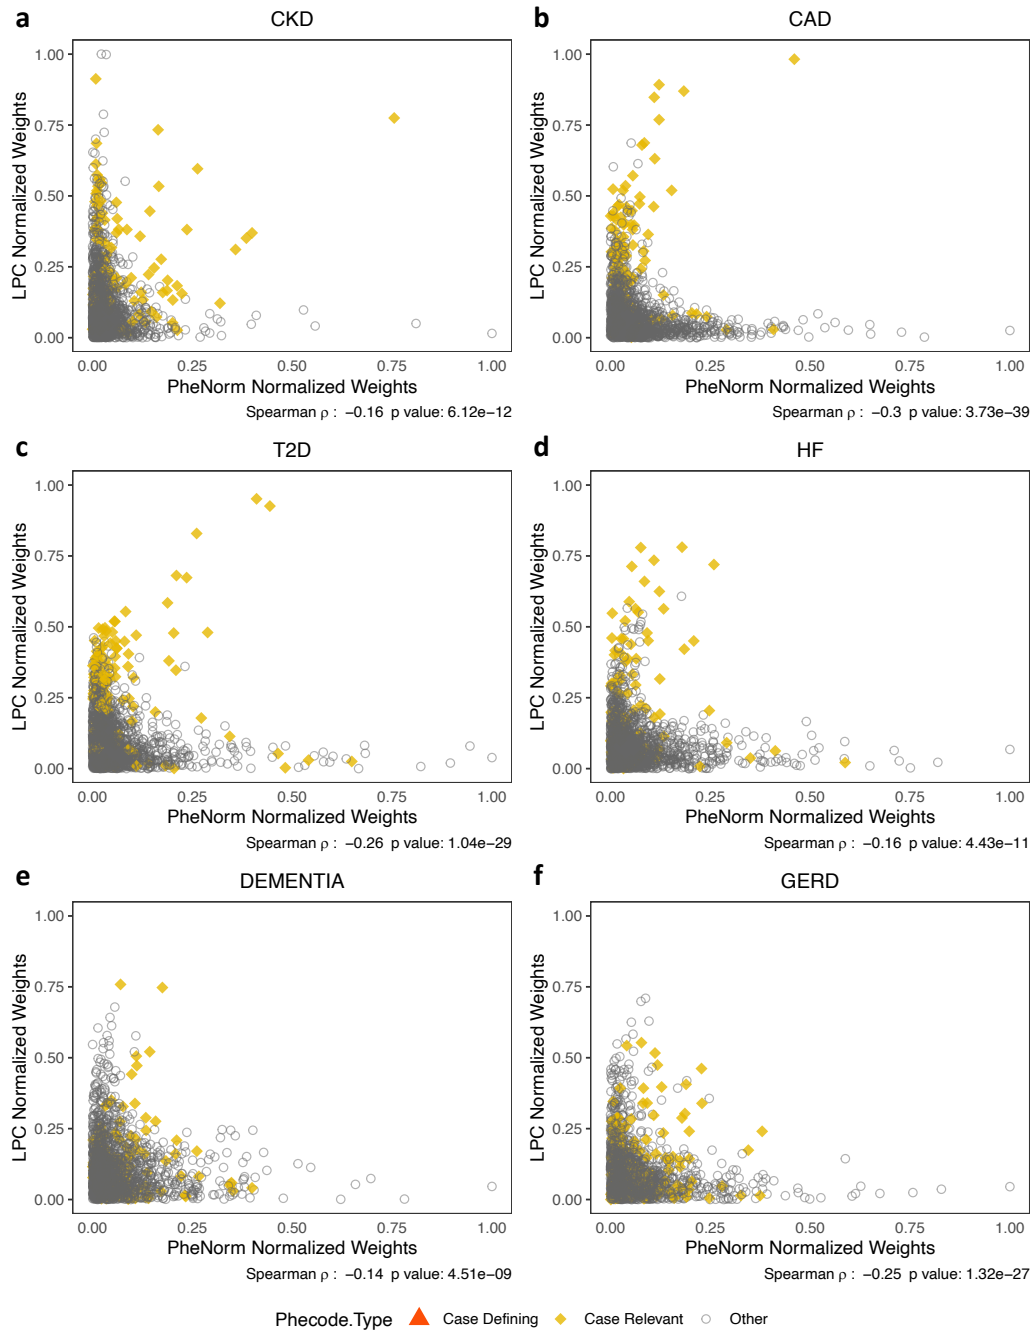

Supplementary Figure 14: **Weights for all phecodes used to build PheNorm and LPC for 6 phenotypes.** Scatter plots of weights for **a** CKD (cases including G1, G2, G3a/b, and G4 stages), **b** CAD, **c** T2D, **d** HF, **e** Dementia, and **f** GERD. The weights for the case defining and pre-selected phecodes are highlighted.

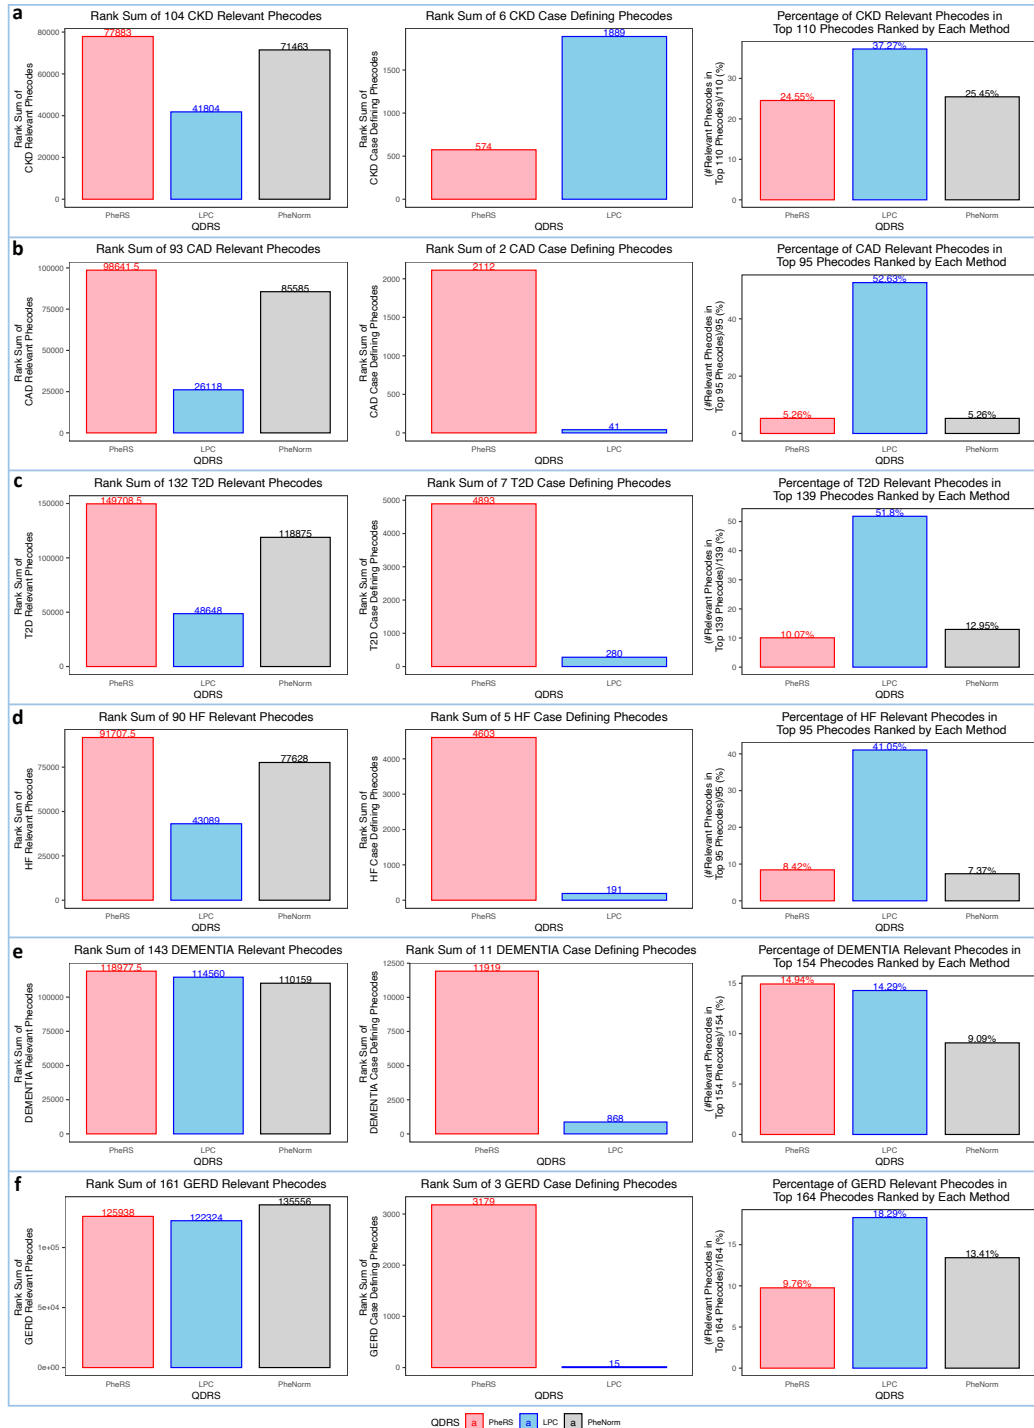

Supplementary Figure 15: Rank sum of relevant phecodes (excluding case defining phecodes), case defining phecodes and percentage of relevant phecodes among top phecodes ranked by PheRS, LPC and PheNorm. a CKD, b CAD, c T2D, d HF, e Dementia, and f GERD.

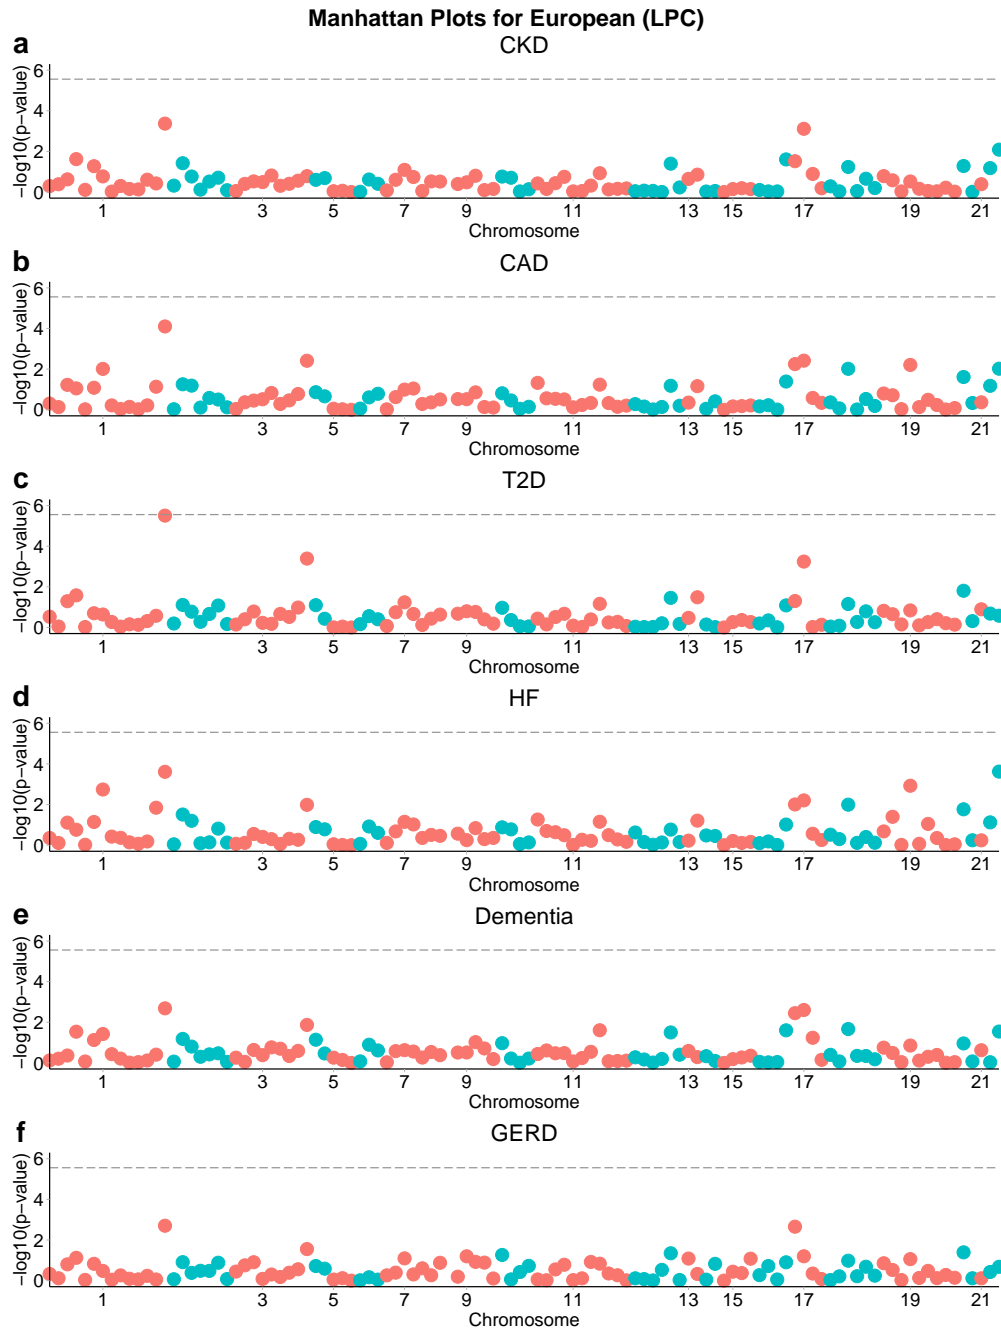

Supplementary Figure 16: **Gene-based test results for the European dataset for 107 autosomal genes on the eMERGE-seq panel using LPC with all phecodes for six diseases.** Manhattan plots for **a** CKD, **b** CAD, **c** T2D, **d** HF, **e** Dementia, and **f** GERD. The horizontal line corresponds to exome-wide significance level.

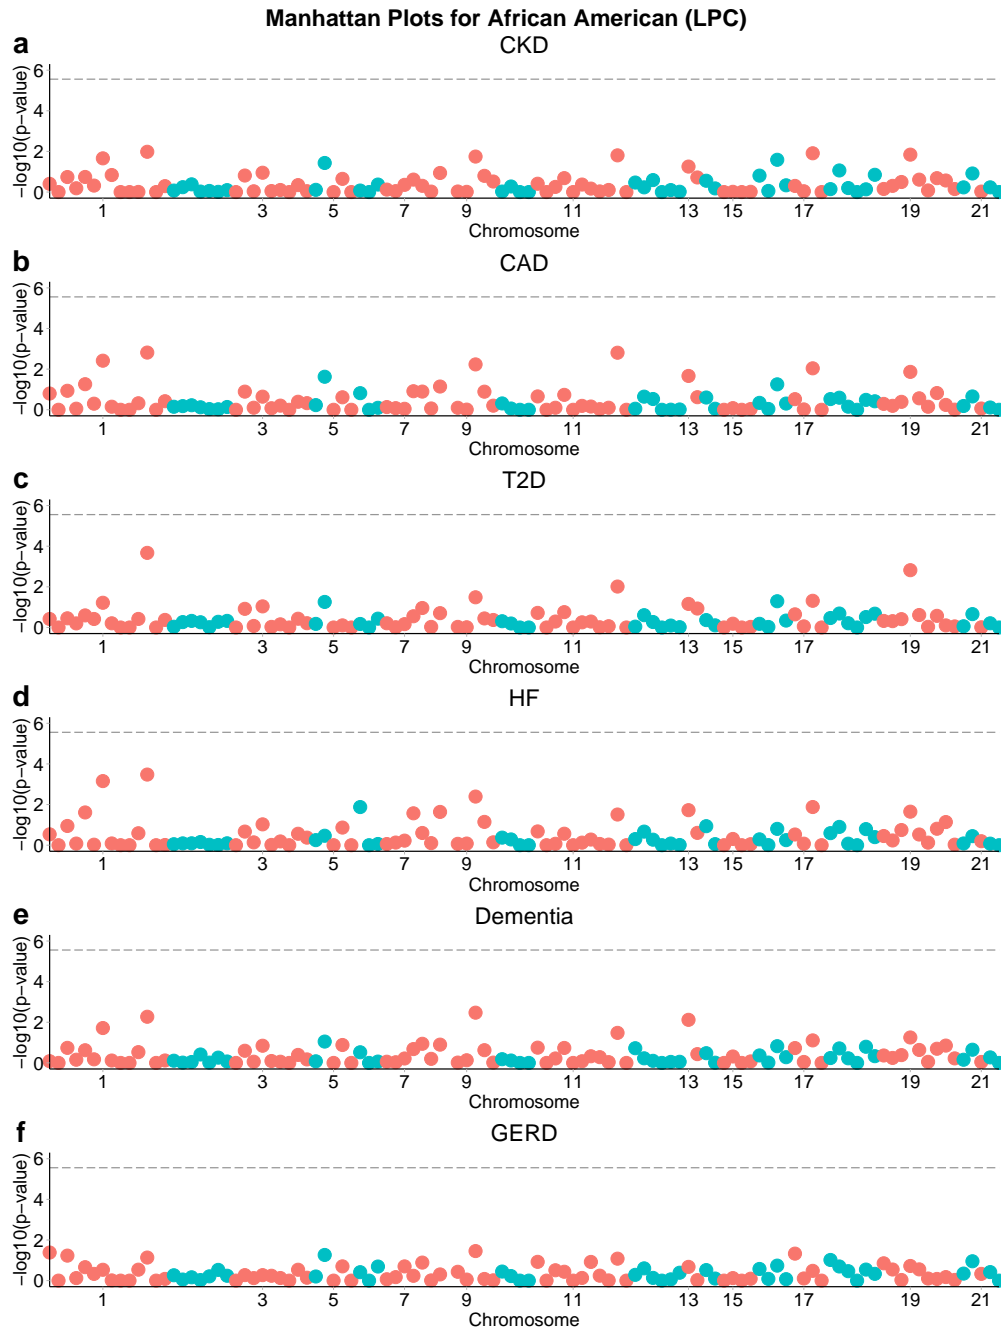

Supplementary Figure 17: **Gene-based test results for the African American dataset for 107 autosomal genes on the eMERGE-seq panel using LPC with all phecodes for six diseases.** Manhattan plots for **a** CKD, **b** CAD, **c** T2D, **d** HF, **e** Dementia, and **f** GERD. The horizontal line corresponds to exome-wide significance level.

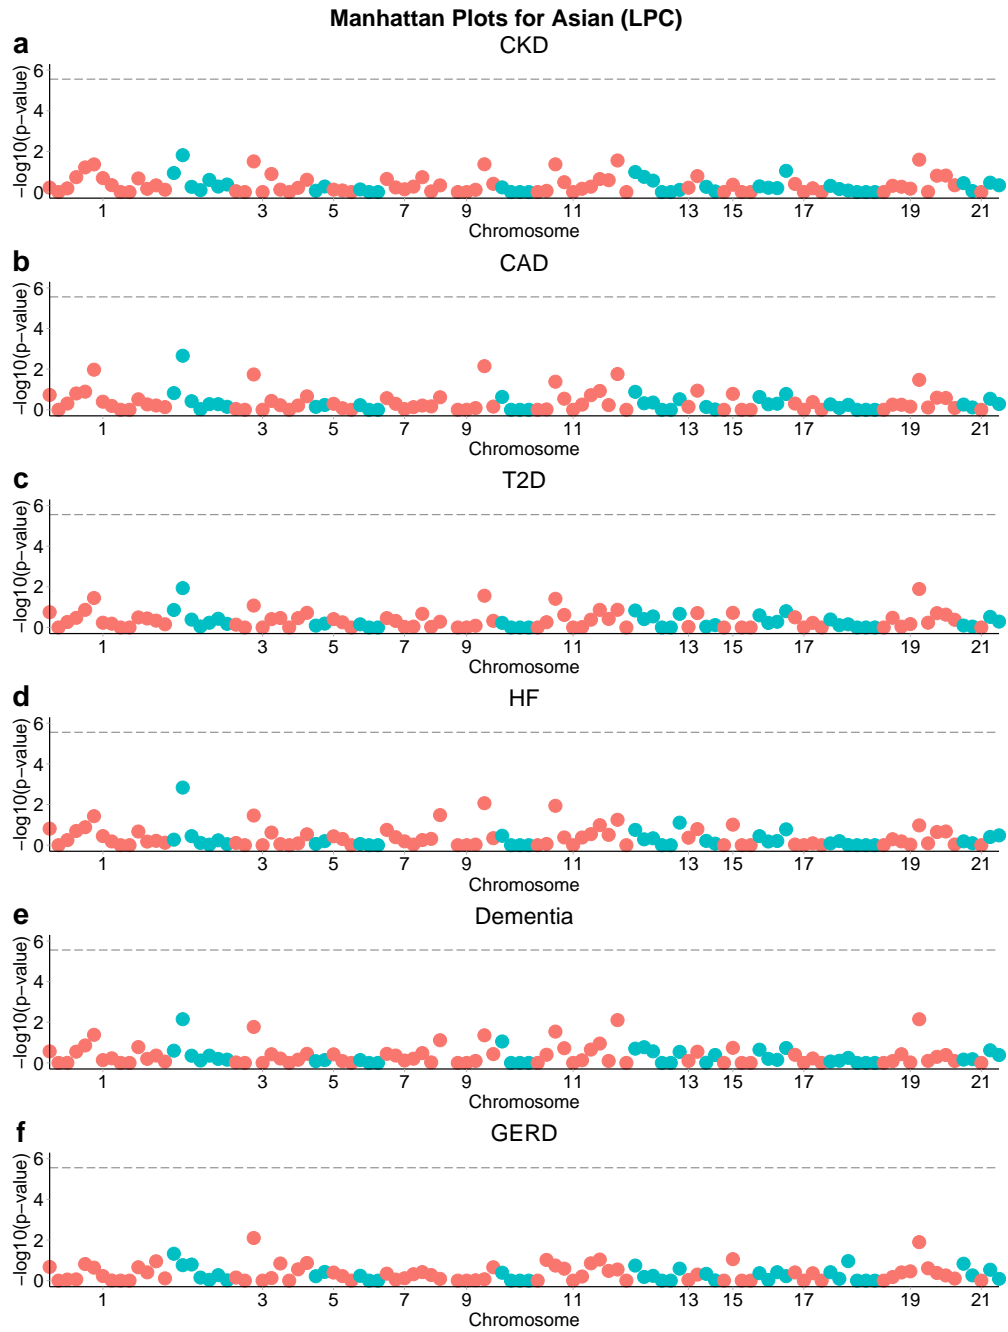

Supplementary Figure 18: **Gene-based test results for the Asian dataset for 107 autosomal genes on the eMERGE-seq panel using LPC with all phecodes for six diseases.** Manhattan plots for **a** CKD, **b** CAD, **c** T2D, **d** HF, **e** Dementia, and **f** GERD. The horizontal line corresponds to exome-wide significance level.



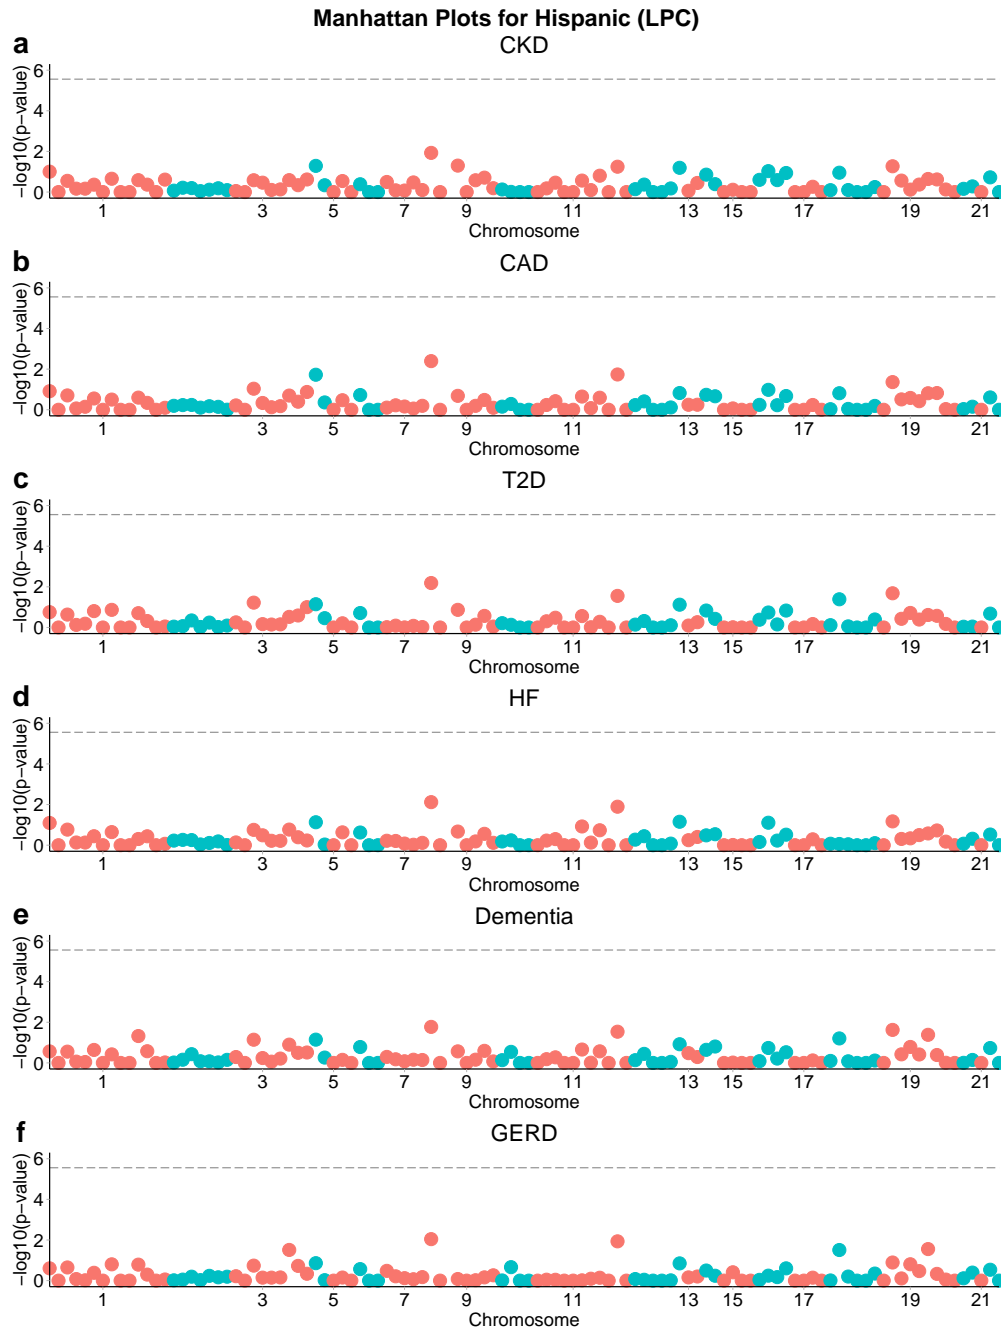

Supplementary Figure 19: **Gene-based test results for the Hispanic dataset for 107 autosomal genes on the eMERGE-seq panel using LPC with all phecodes for six diseases.** Manhattan plots for **a** CKD, **b** CAD, **c** T2D, **d** HF, **e** Dementia, and **f** GERD. The horizontal line corresponds to exome-wide significance level.

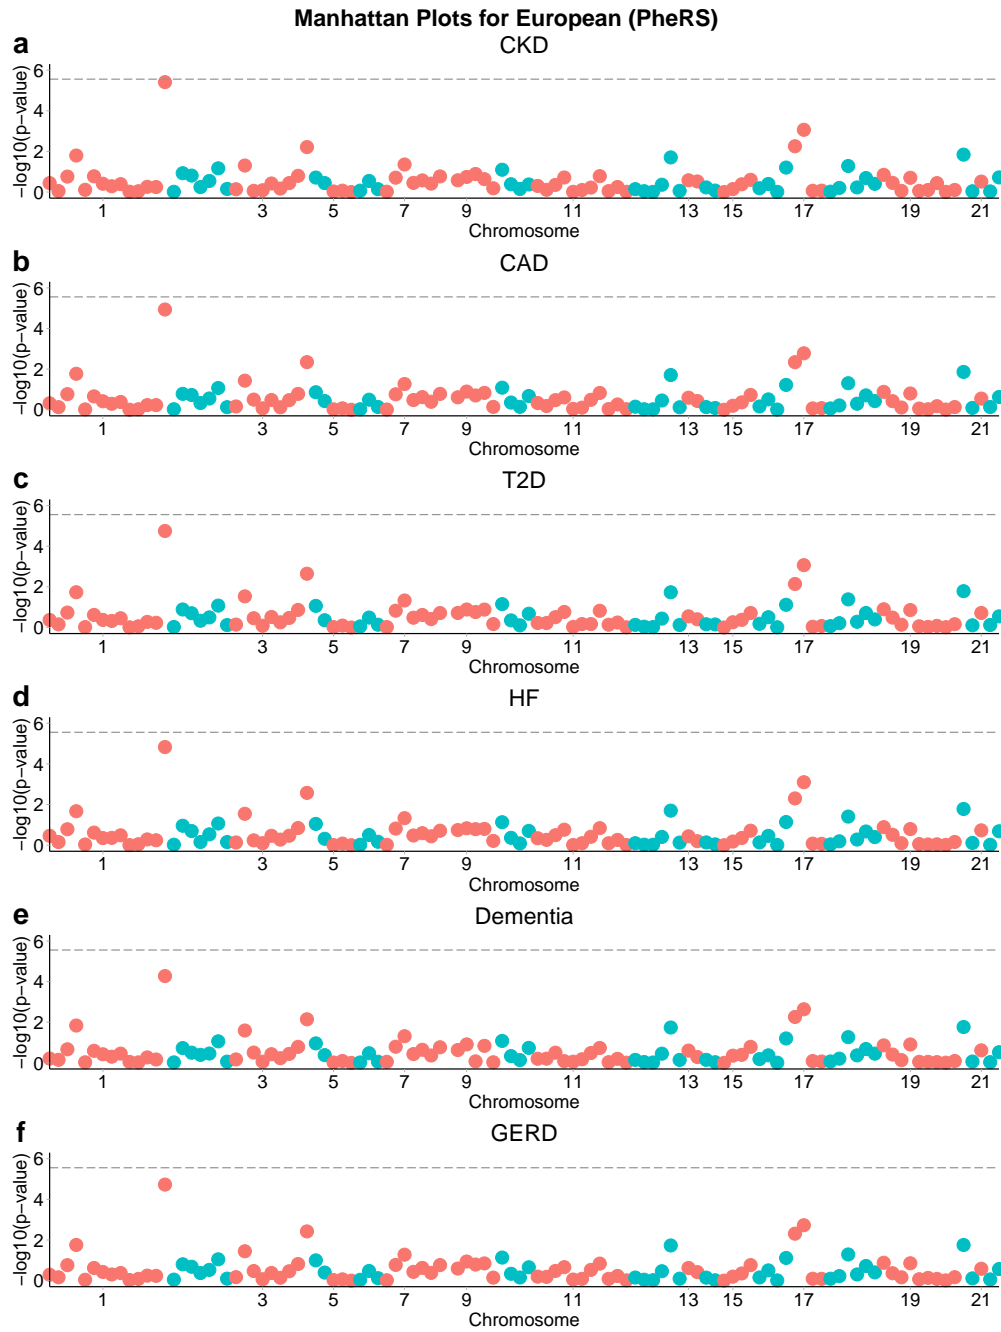

Supplementary Figure 20: **Gene-based test results for the European dataset for 107 autosomal genes on the eMERGE-seq panel using PheRS with all phecodes for six diseases.** Manhattan plots for **a** CKD, **b** CAD, **c** T2D, **d** HF, **e** Dementia, and **f** GERD. The horizontal line corresponds to exome-wide significance level.

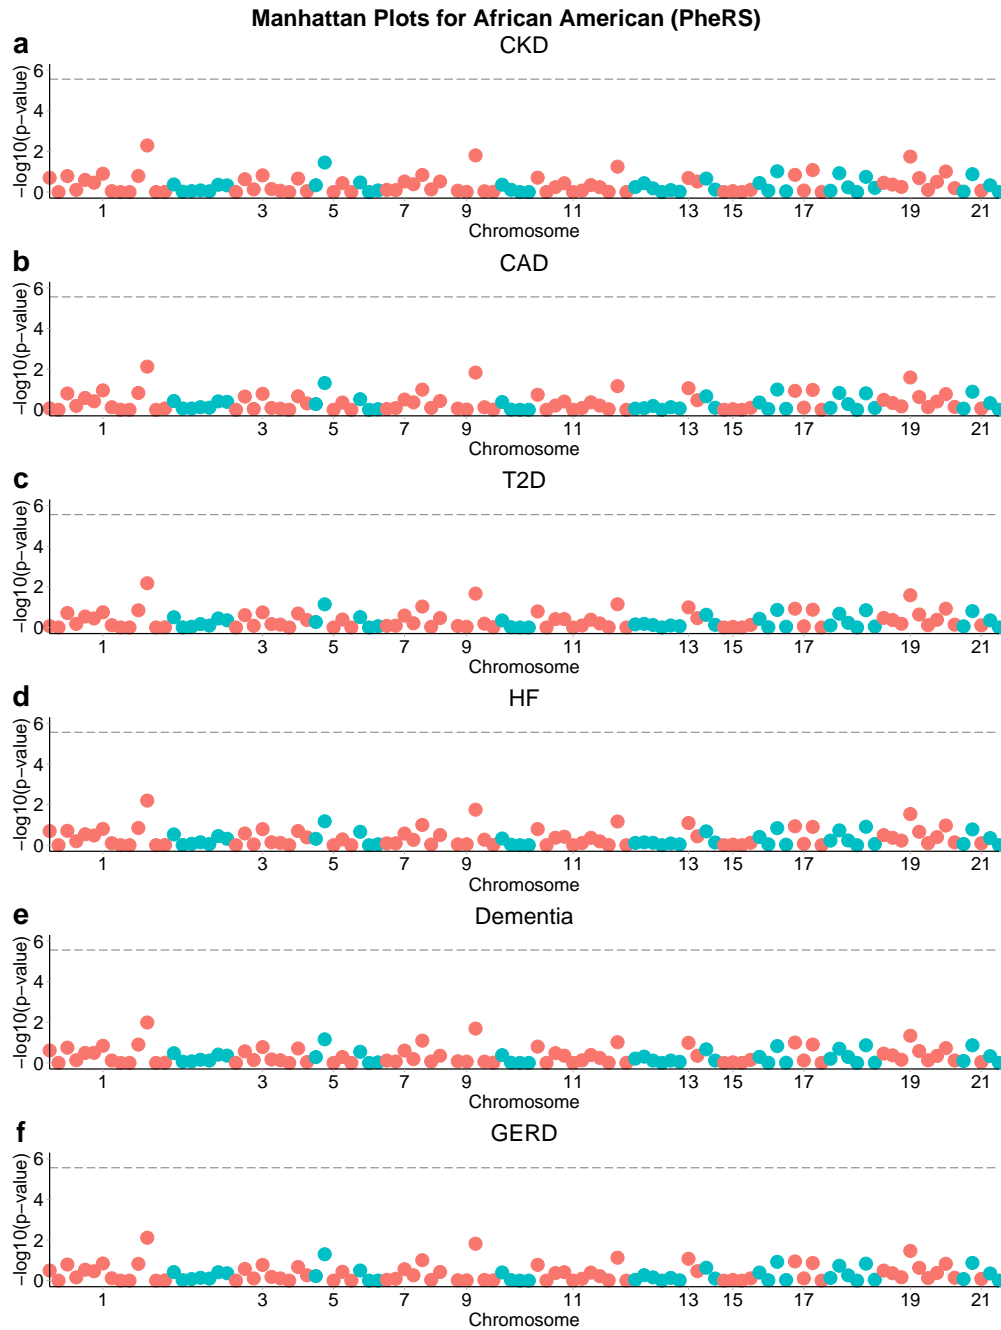

Supplementary Figure 21: **Gene-based test results for the African American dataset for 107 autosomal genes on the eMERGE-seq panel using PheRS with all phecodes for six diseases.** Manhattan plots for **a** CKD, **b** CAD, **c** T2D, **d** HF, **e** Dementia, and **f** GERD. The horizontal line corresponds to exome-wide significance level.

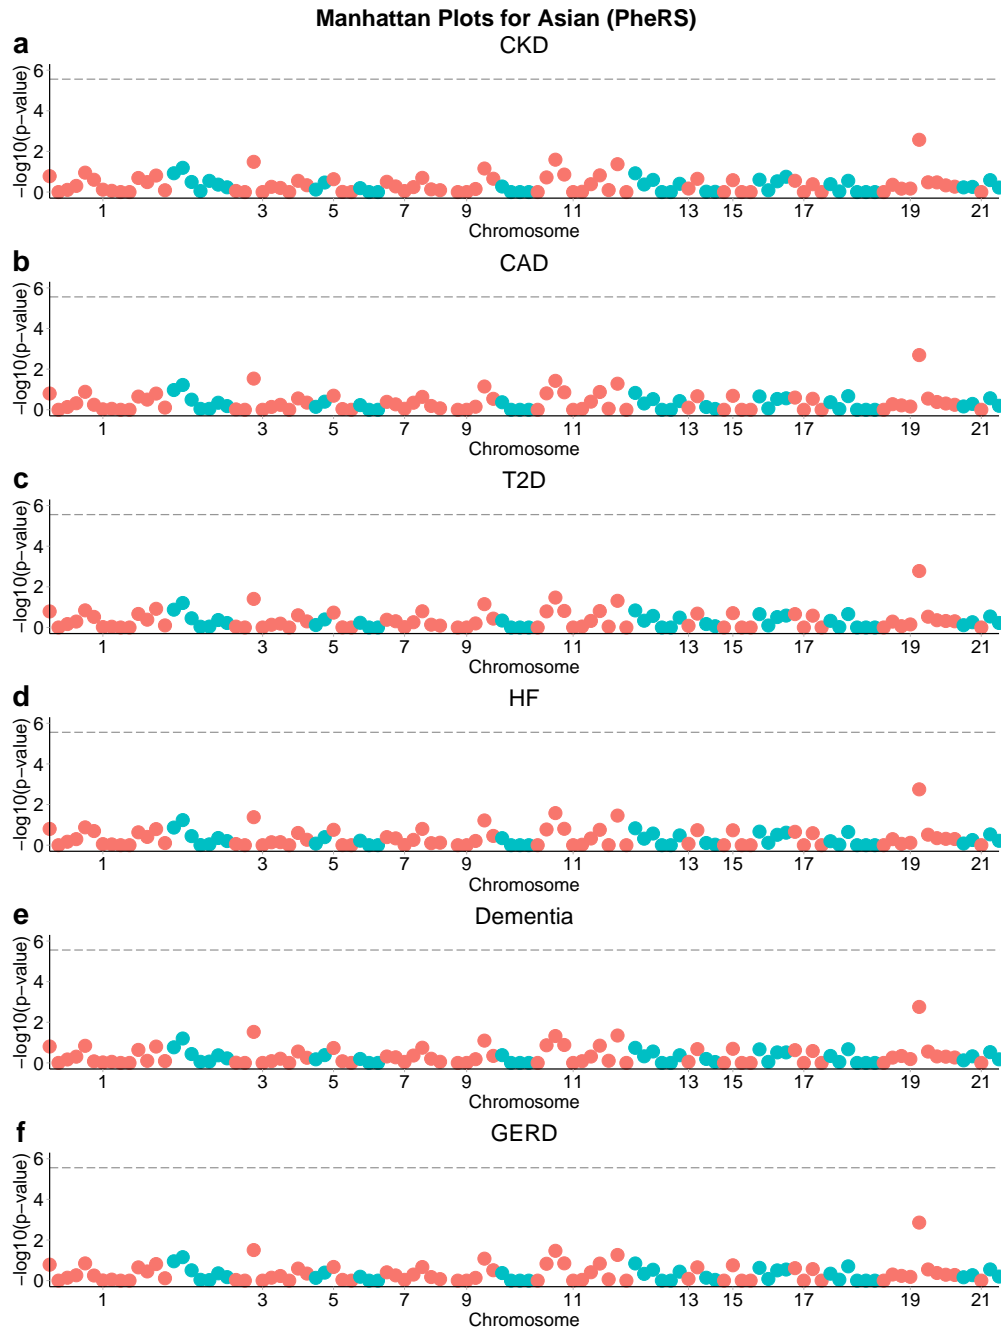

Supplementary Figure 22: **Gene-based test results for the Asian dataset for 107 autosomal genes on the eMERGE-seq panel using PheRS with all phecodes for six diseases.** Manhattan plots for **a** CKD, **b** CAD, **c** T2D, **d** HF, **e** Dementia, and **f** GERD. The horizontal line corresponds to exome-wide significance level.

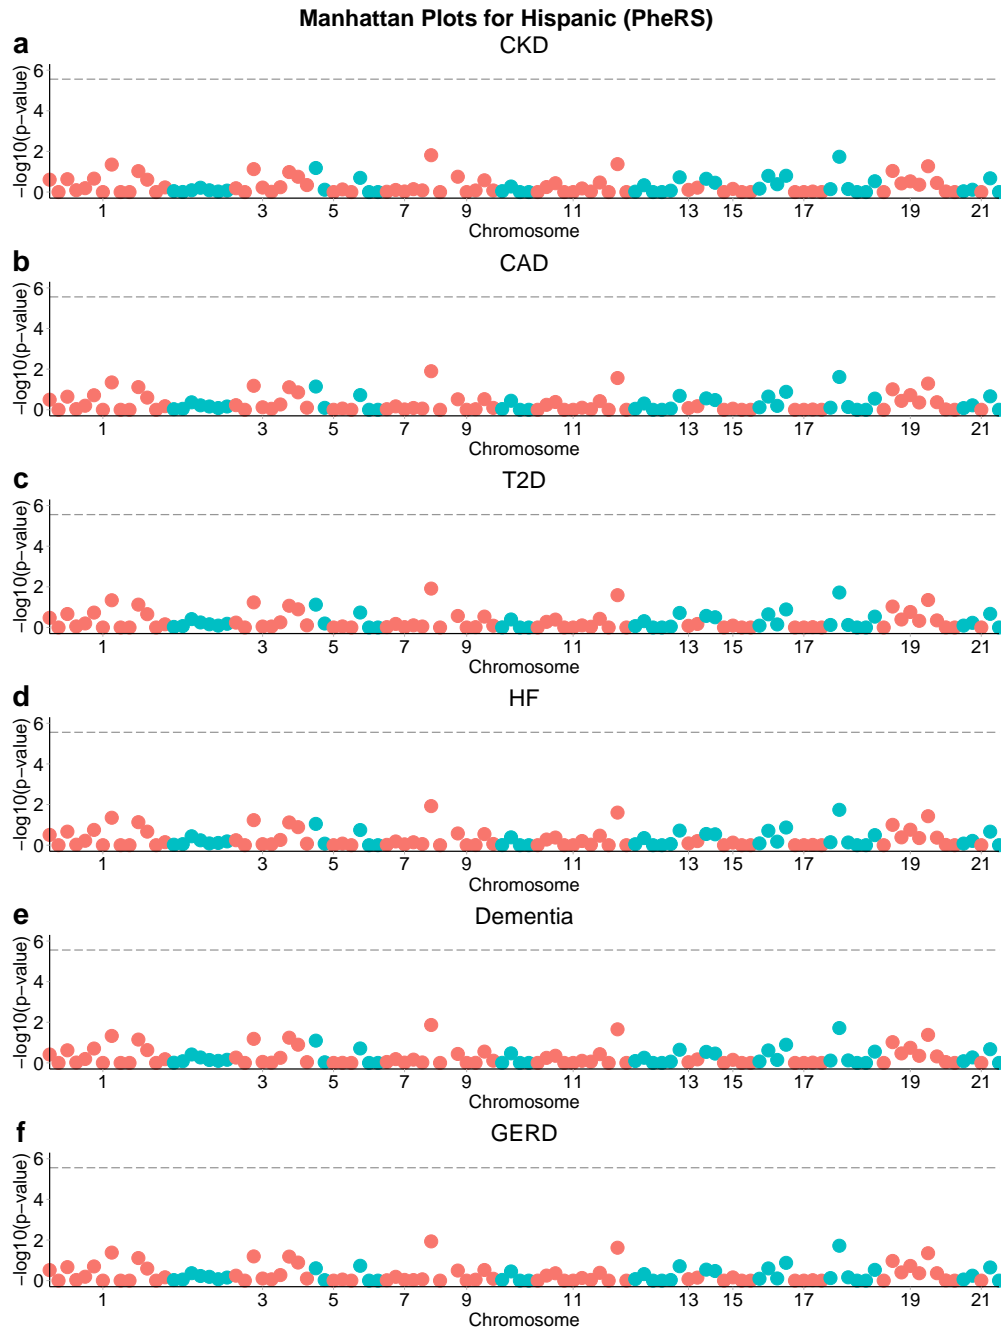

Supplementary Figure 23: **Gene-based test results for the Hispanic dataset for 107 autosomal genes on the eMERGE-seq panel using PheRS with all phecodes for six diseases.** Manhattan plots for **a** CKD, **b** CAD, **c** T2D, **d** HF, **e** Dementia, and **f** GERD. The horizontal line corresponds to exome-wide significance level.

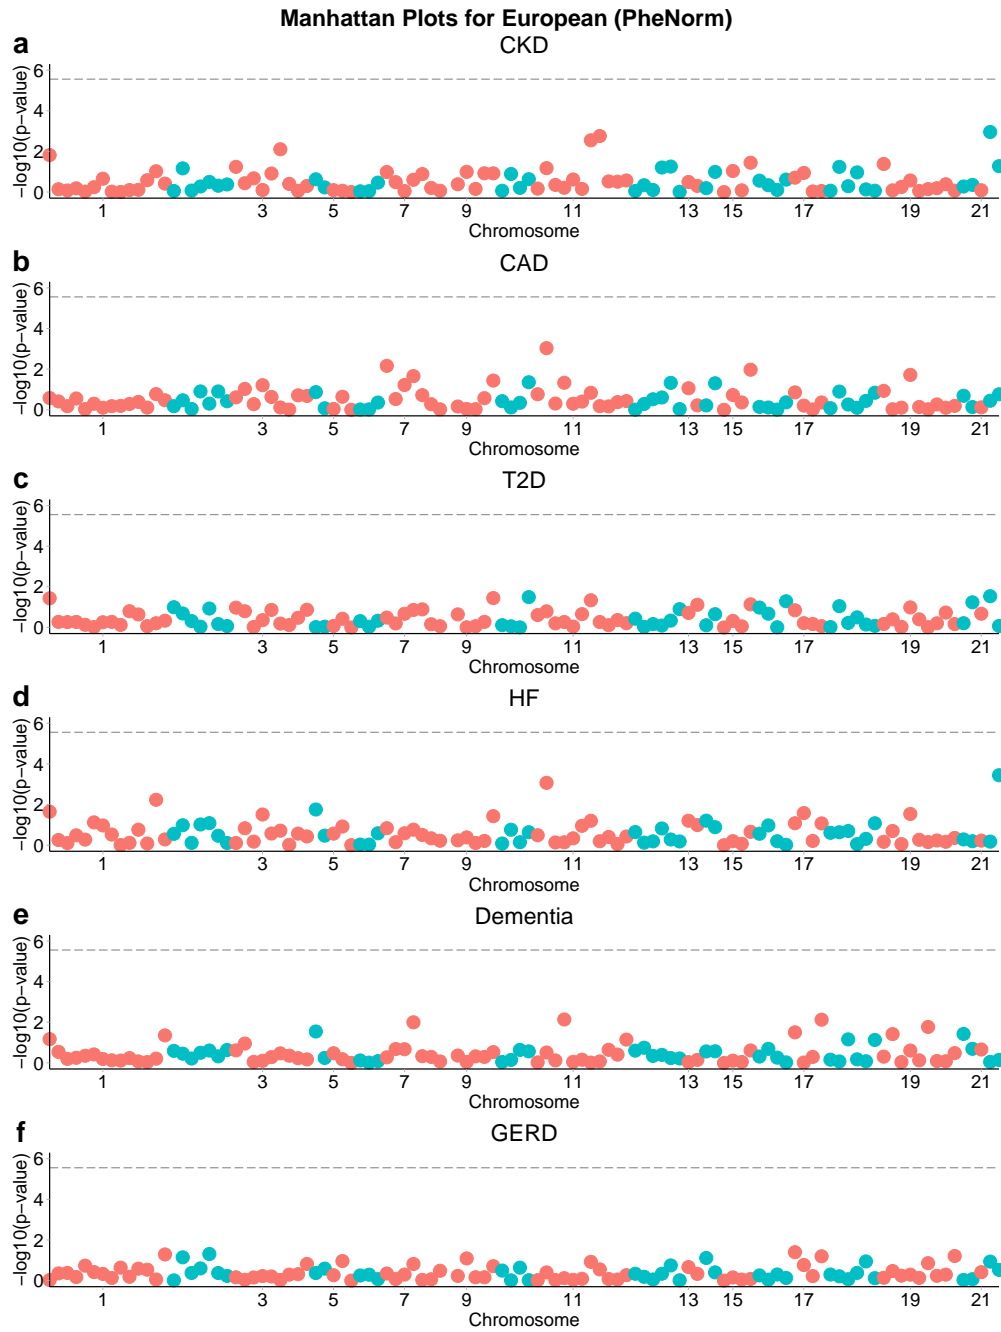

Supplementary Figure 24: **Gene-based test results for the European dataset for 107 autosomal genes on the eMERGE-seq panel using PheNorm with all phecodes for six diseases.** Manhattan plots for **a** CKD, **b** CAD, **c** T2D, **d** HF, **e** Dementia, and **f** GERD. The horizontal line corresponds to exome-wide significance level.

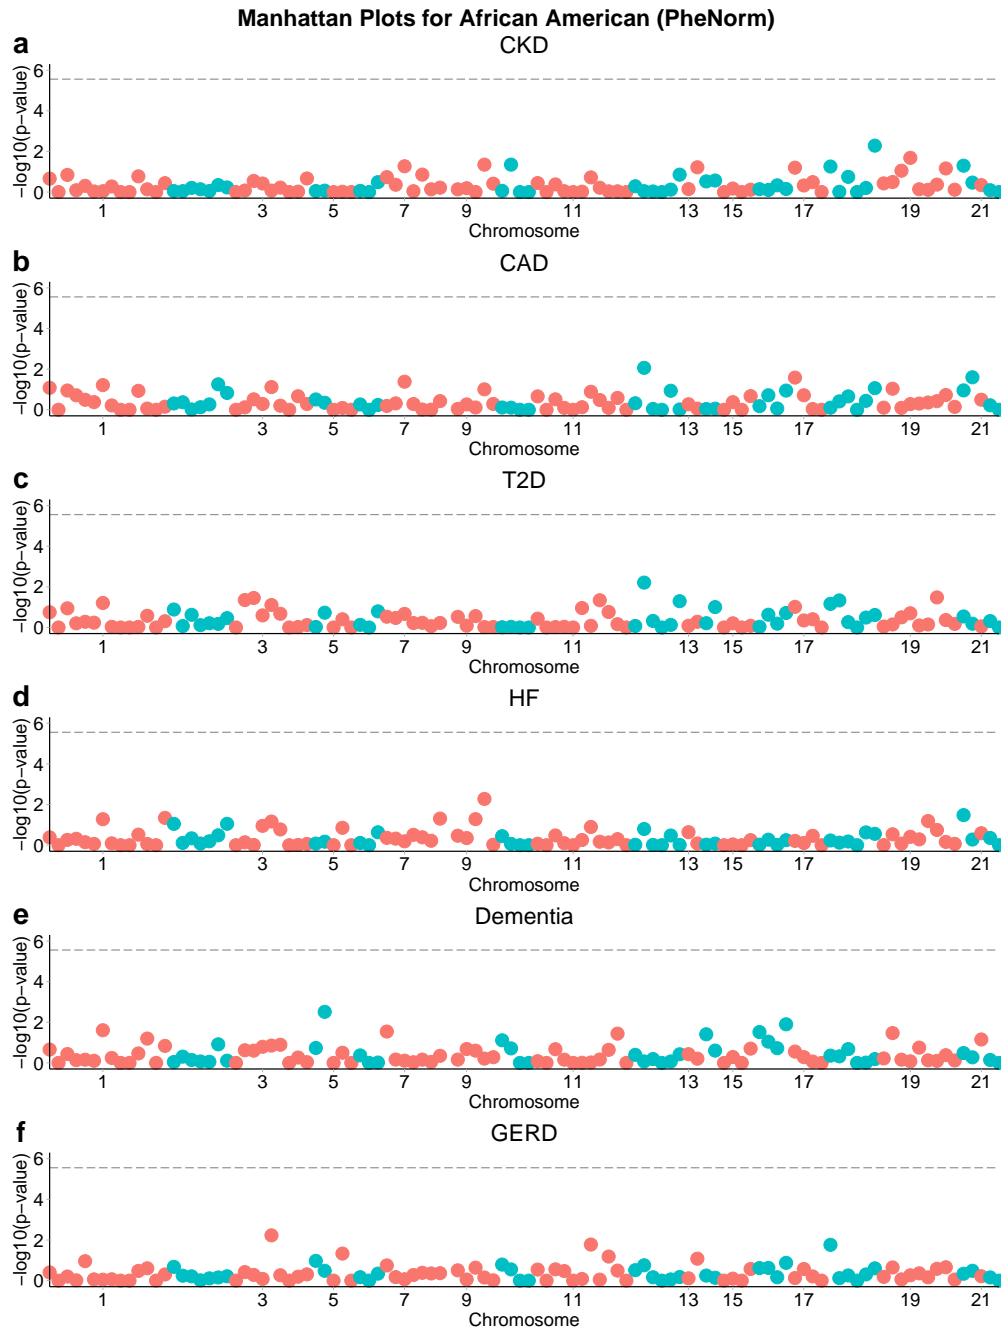

Supplementary Figure 25: **Gene-based test results for the African American for 107 autosomal genes on the eMERGE-seq panel using PheNorm with all phecodes for six diseases.** Manhattan plots for **a** CKD, **b** CAD, **c** T2D, **d** HF, **e** Dementia, and **f** GERD. The horizontal line corresponds to exome-wide significance level.

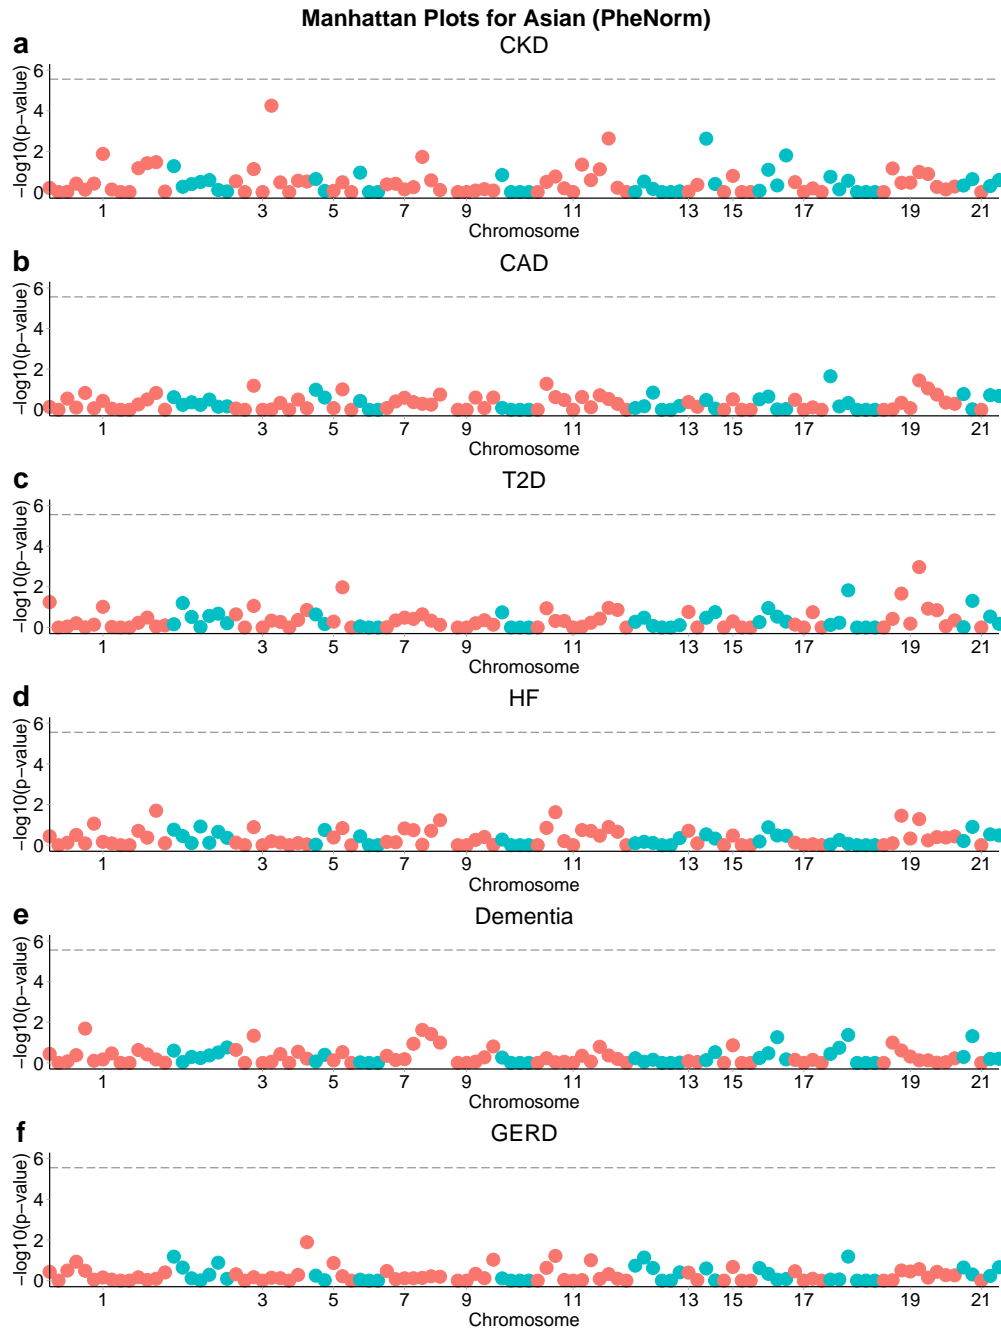

Supplementary Figure 26: **Gene-based test results for the Asian dataset for 107 autosomal genes on the eMERGE-seq panel using PheNorm with all phecodes for six diseases.** Manhattan plots for **a** CKD, **b** CAD, **c** T2D, **d** HF, **e** Dementia, and **f** GERD. The horizontal line corresponds to exome-wide significance level.



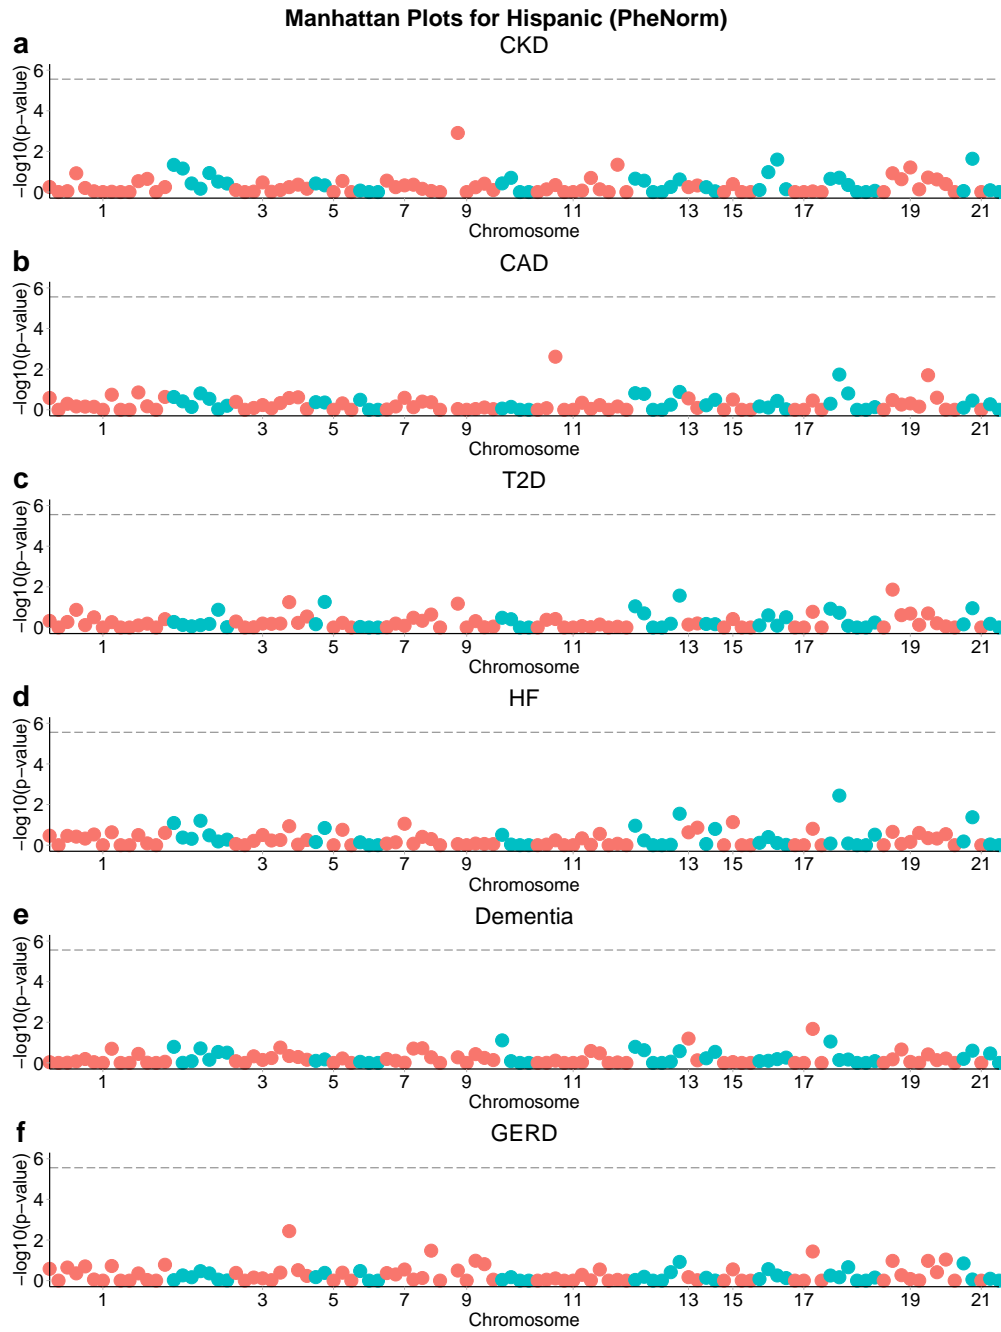

Supplementary Figure 27: **Gene-based test results for the Hispanic dataset for 107 autosomal genes on the eMERGE-seq panel using PheNorm with all phecodes for six diseases.** Manhattan plots for **a** CKD, **b** CAD, **c** T2D, **d** HF, **e** Dementia, and **f** GERD. The horizontal line corresponds to exome-wide significance level.

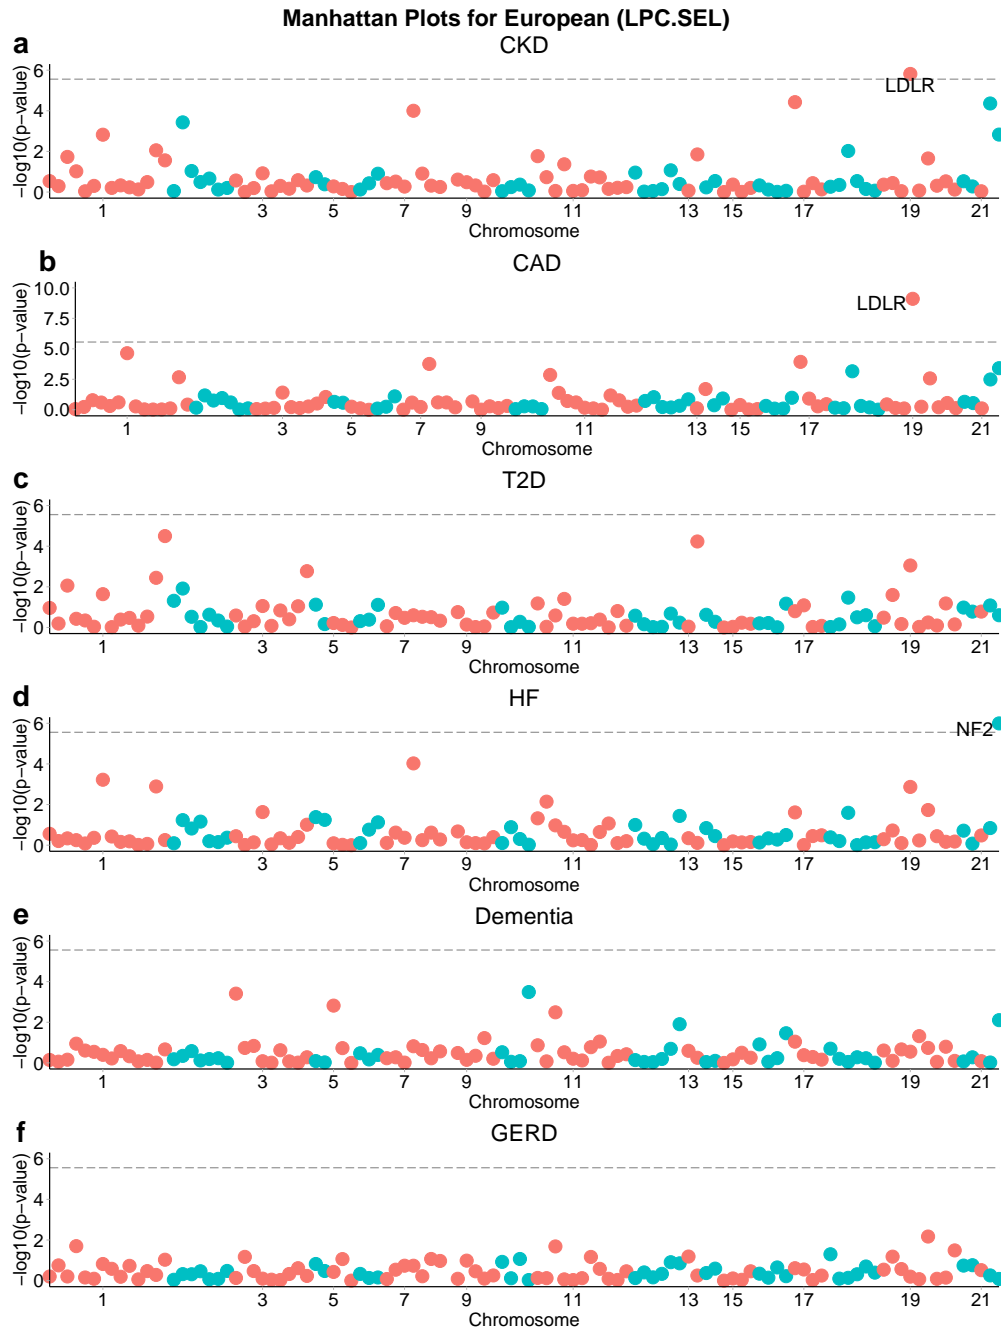

Supplementary Figure 28: **Gene-based test results for the European dataset for 107 autosomal genes on the eMERGE-seq panel using LPC with pre-selected phecodes for six diseases.** Manhattan plots for **a** CKD, **b** CAD, **c** T2D, **d** HF, **e** Dementia, and **f** GERD. The horizontal line corresponds to exome-wide significance level.

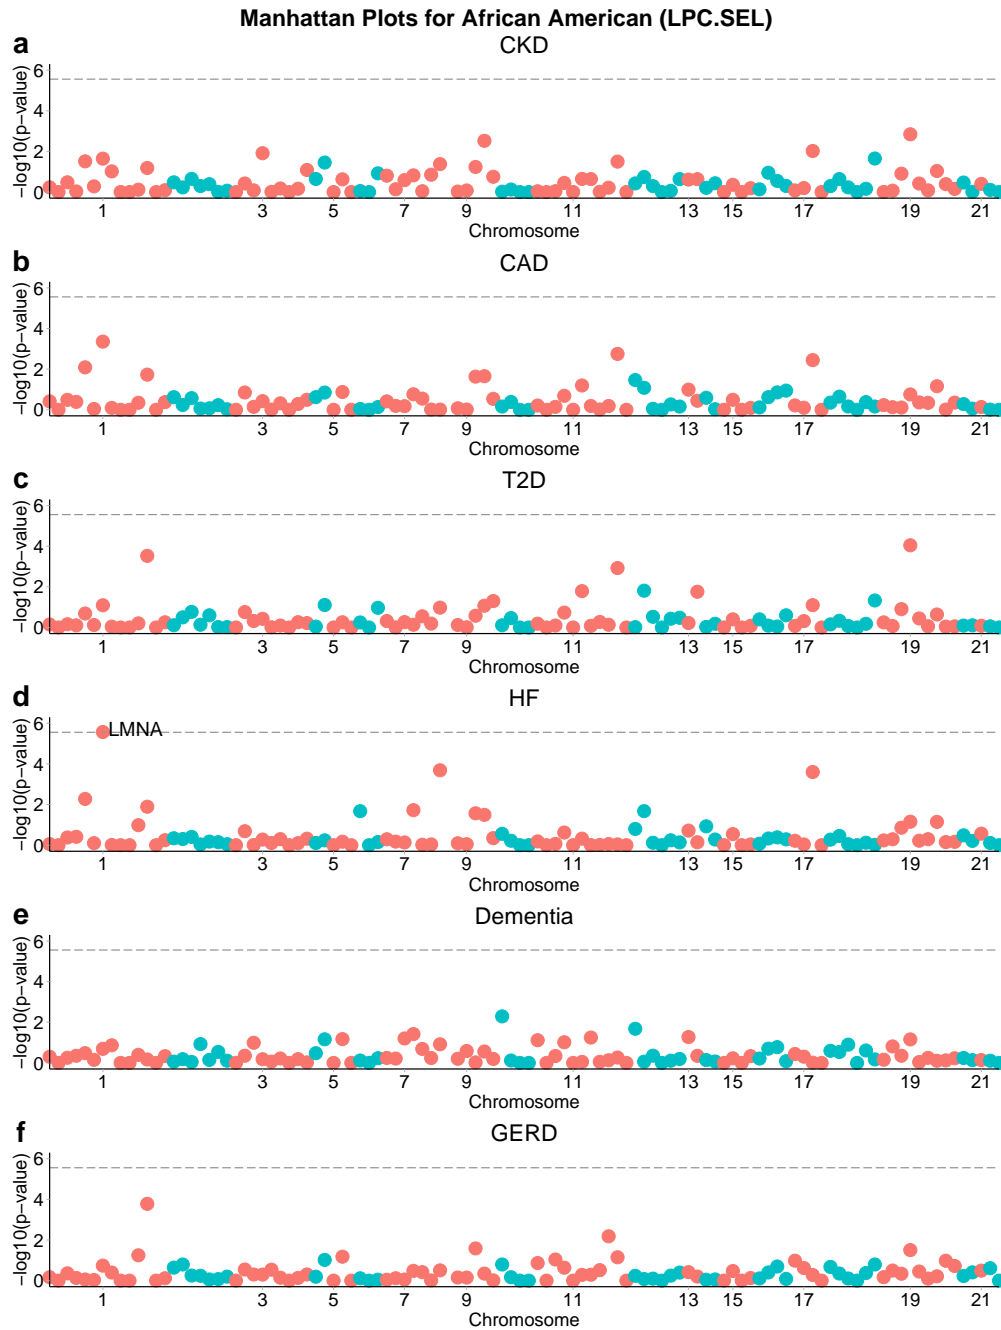

Supplementary Figure 29: **Gene-based test results for the African American dataset for 107 autosomal genes on the eMERGE-seq panel using LPC with pre-selected phecodes for six diseases.** Manhattan plots for **a** CKD, **b** CAD, **c** T2D, **d** HF, **e** Dementia, and **f** GERD. The horizontal line corresponds to exome-wide significance level.

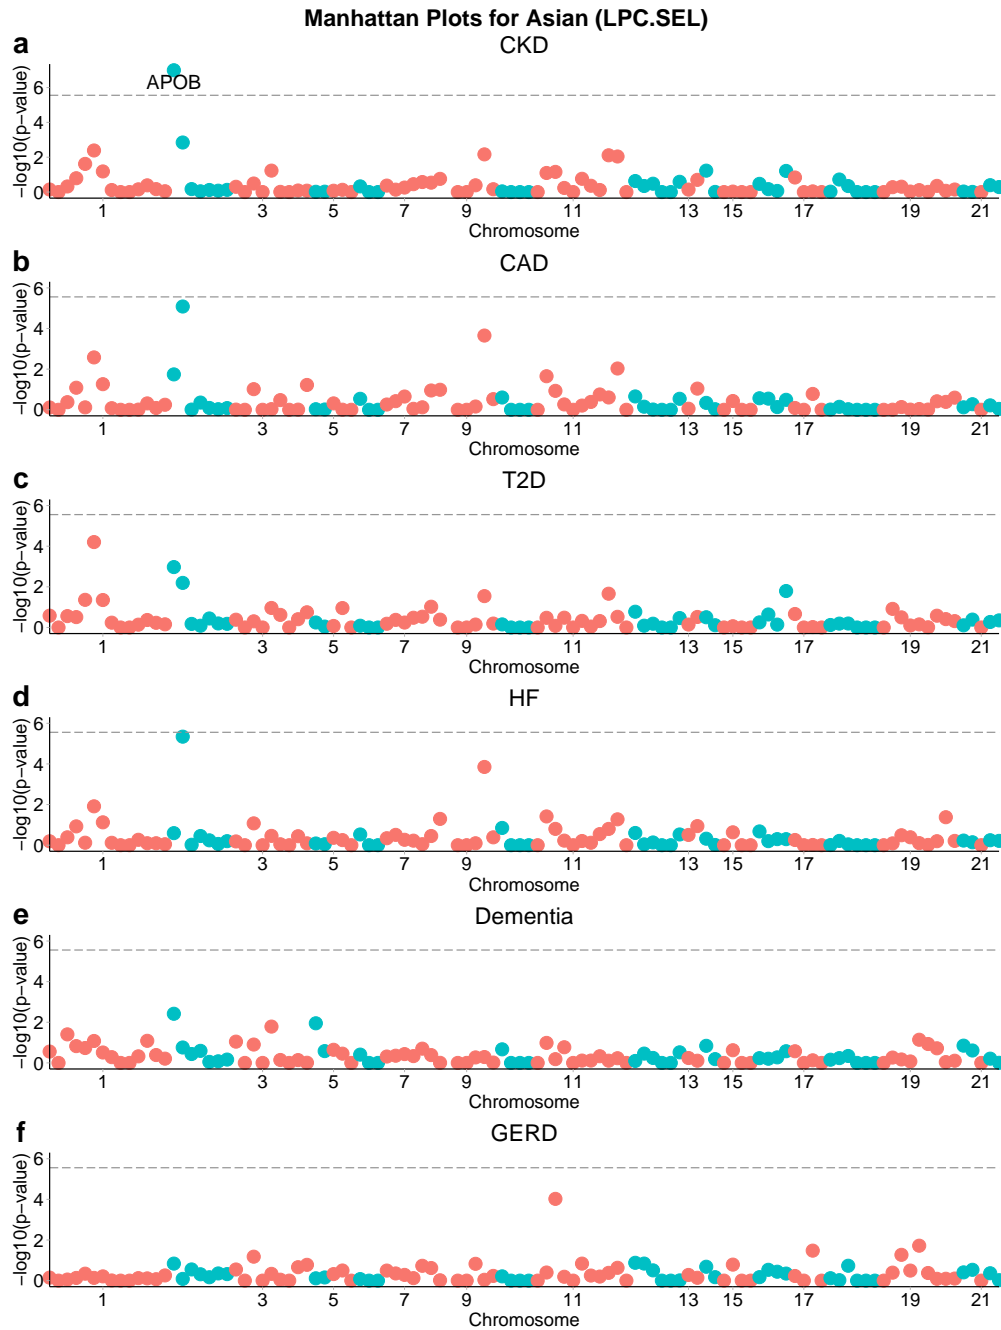

Supplementary Figure 30: **Gene-based test results for the Asian dataset for 107 autosomal genes on the eMERGE-seq panel using LPC with pre-selected phecodes for six diseases.** Manhattan plots for **a** CKD, **b** CAD, **c** T2D, **d** HF, **e** Dementia, and **f** GERD. The horizontal line corresponds to exome-wide significance level.

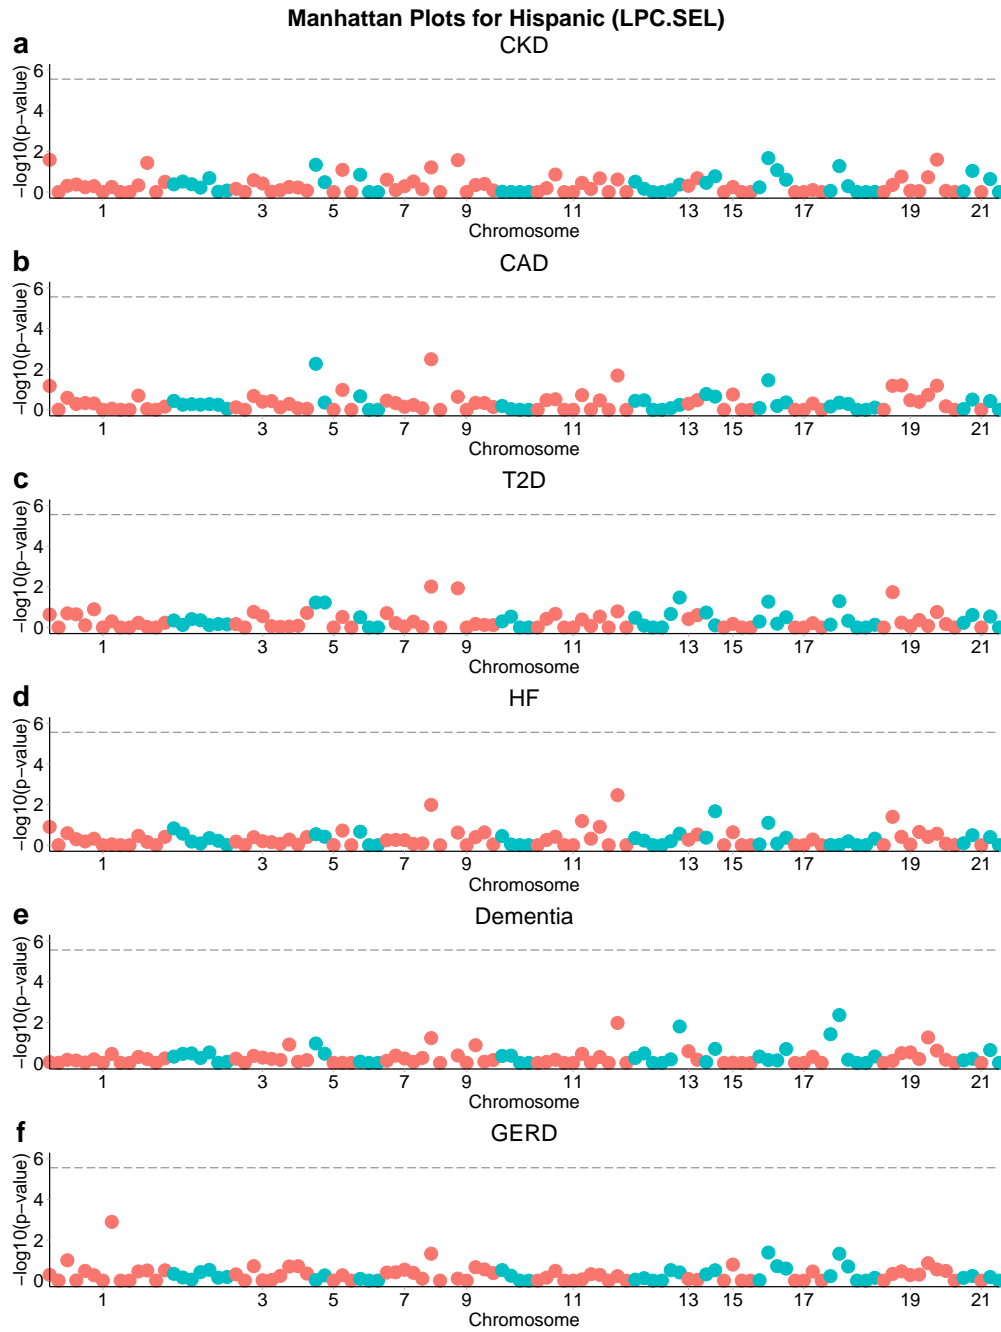

Supplementary Figure 31: **Gene-based test results for the Hispanic dataset for 107 autosomal genes on the eMERGE-seq panel using LPC with pre-selected phecodes for six diseases.** Manhattan plots for **a** CKD, **b** CAD, **c** T2D, **d** HF, **e** Dementia, and **f** GERD. The horizontal line corresponds to exome-wide significance level.

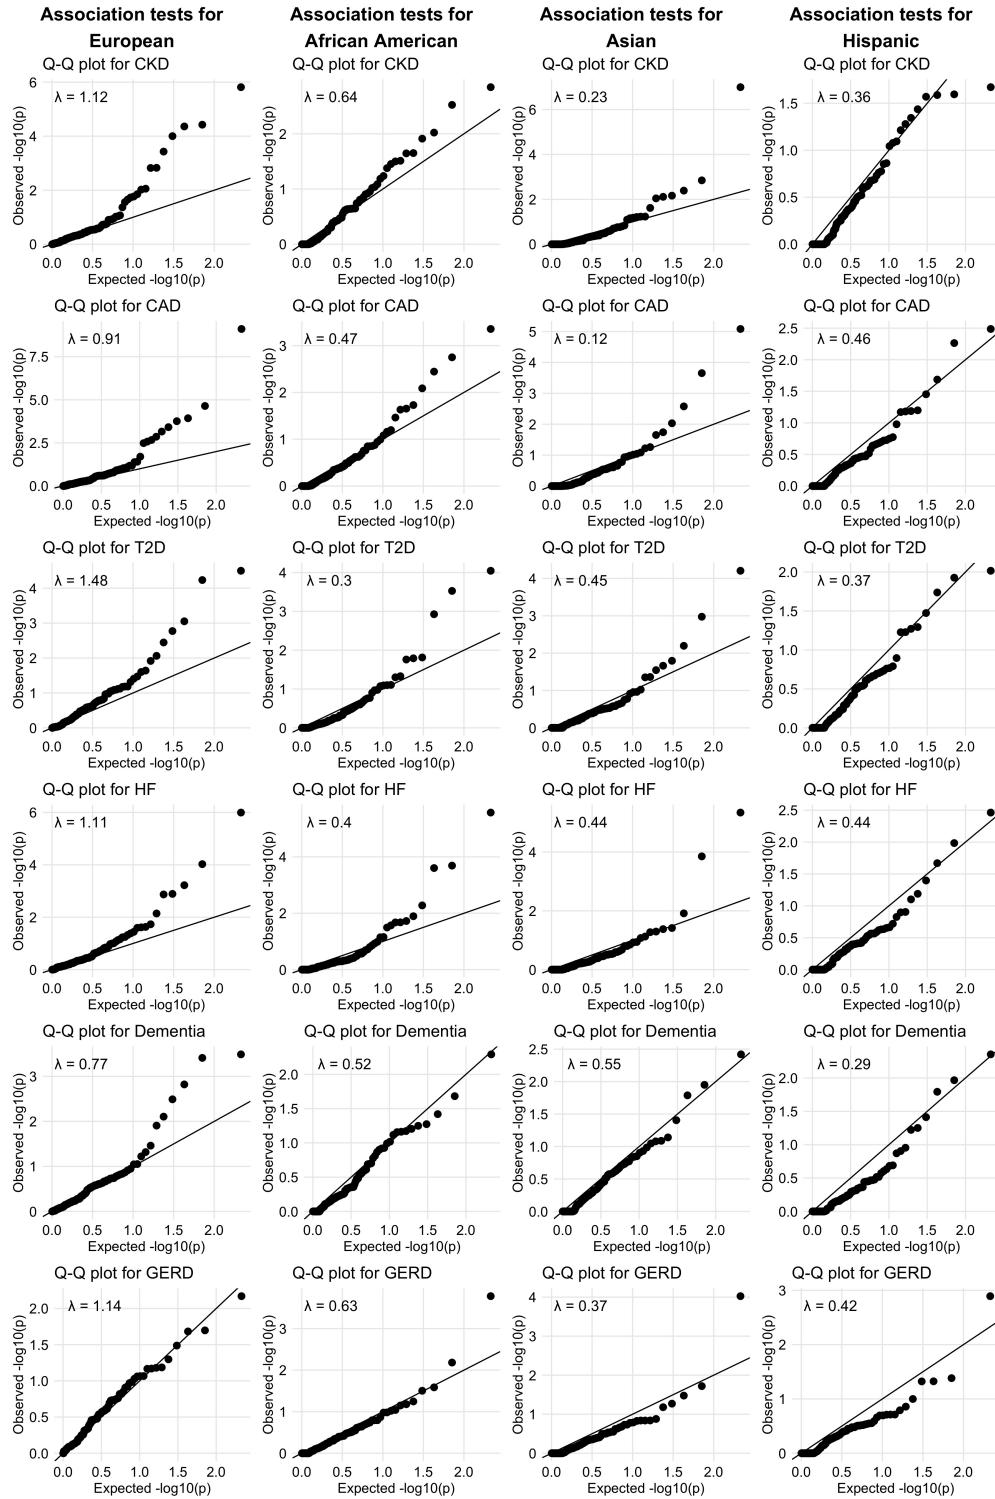

Supplementary Figure 32: QQ plots for gene-based tests for 107 autosomal genes on the eMERGE-seq panel using LPC with pre-selected phecodes for six diseases. Results for four ethnic groups are shown.

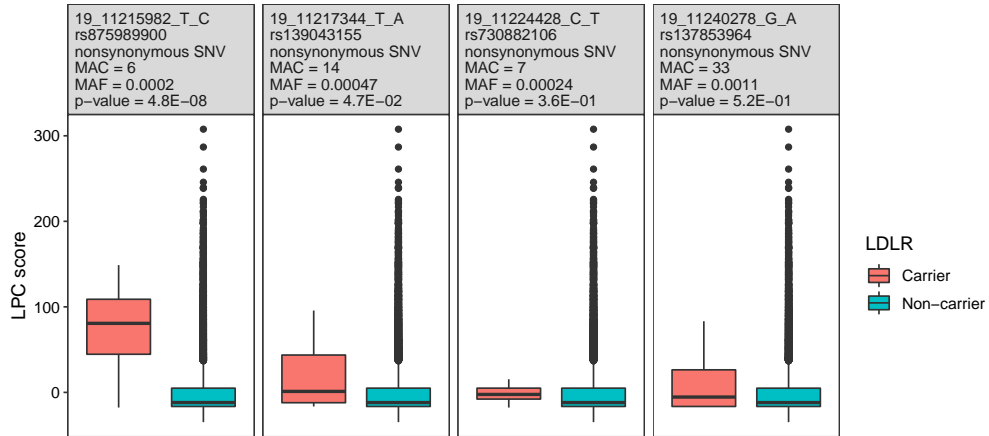

Supplementary Figure 33: **Boxplot of CKD LPC scores for carriers vs. non-carriers of rare variants in *LDLR* (Europeans).**

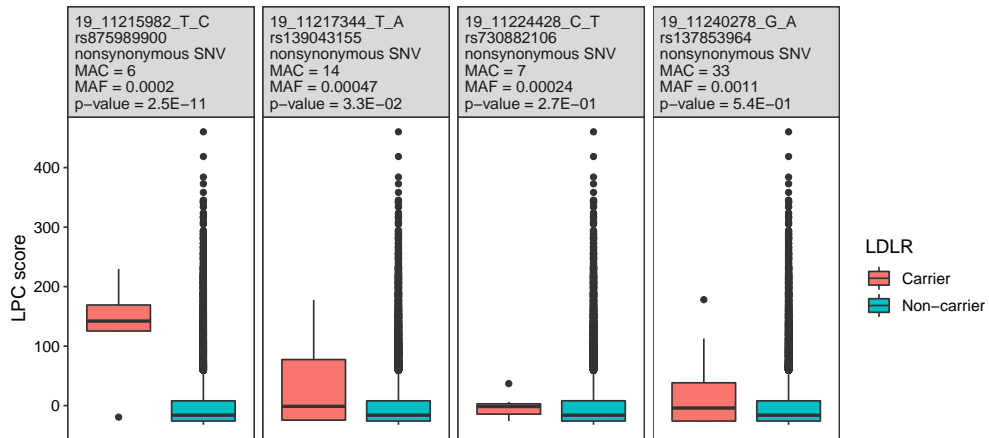

Supplementary Figure 34: **Boxplot of CAD LPC scores for carriers vs. non-carriers of rare variants in *LDLR* (Europeans).**

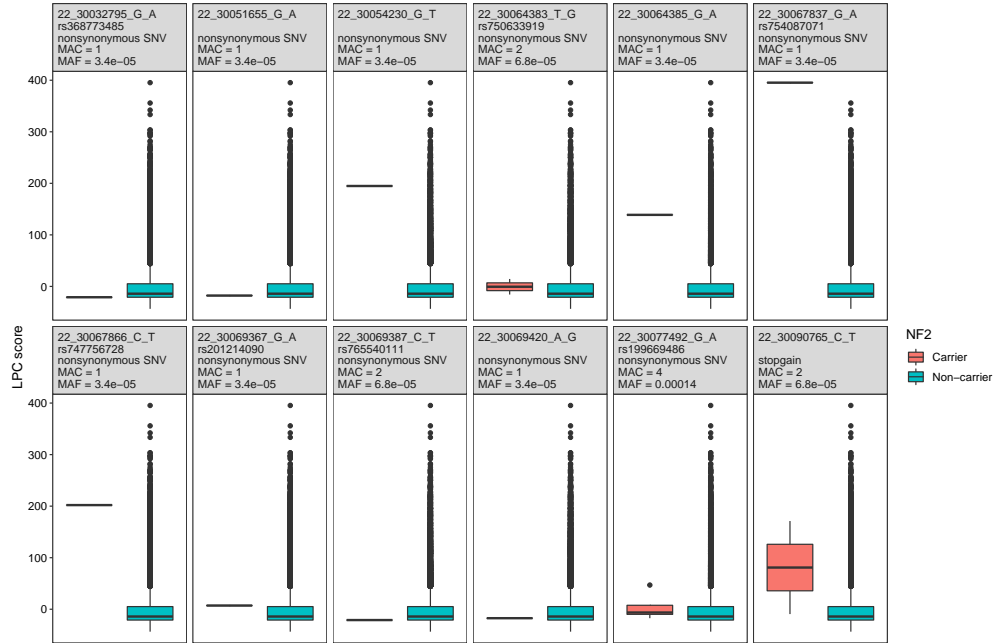

Supplementary Figure 35: Boxplot of HF LPC scores for carriers vs. non-carriers of ultra-rare variants in *NF2* (Europeans).

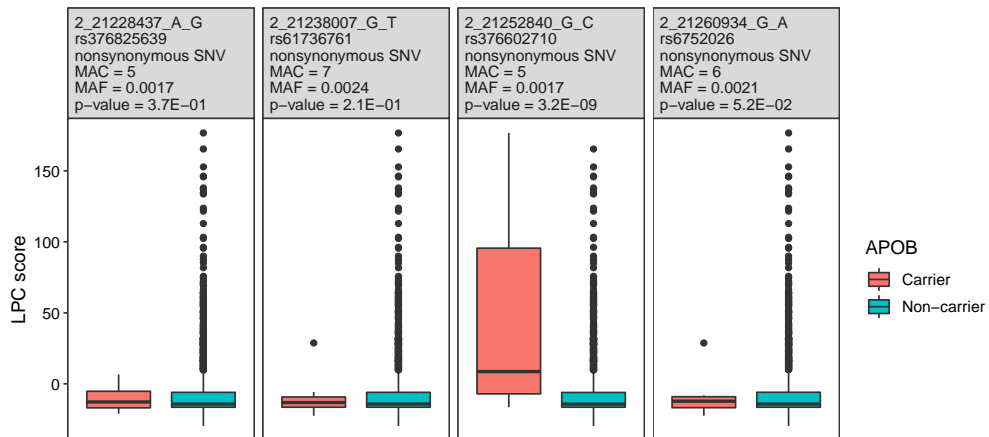

Supplementary Figure 36: Boxplot of CKD LPC scores for carriers vs. non-carriers of rare variants in *APOB* (Asians).



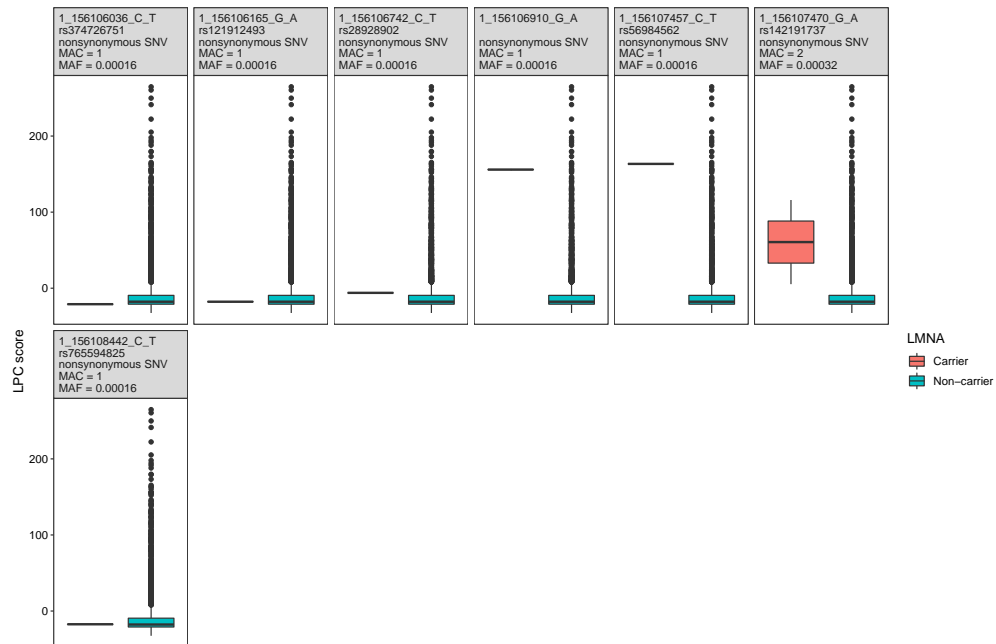

Supplementary Figure 37: **Boxplot of HF LPC scores for carriers vs. non-carriers of ultra-rare variants in *LMNA* (African American).**

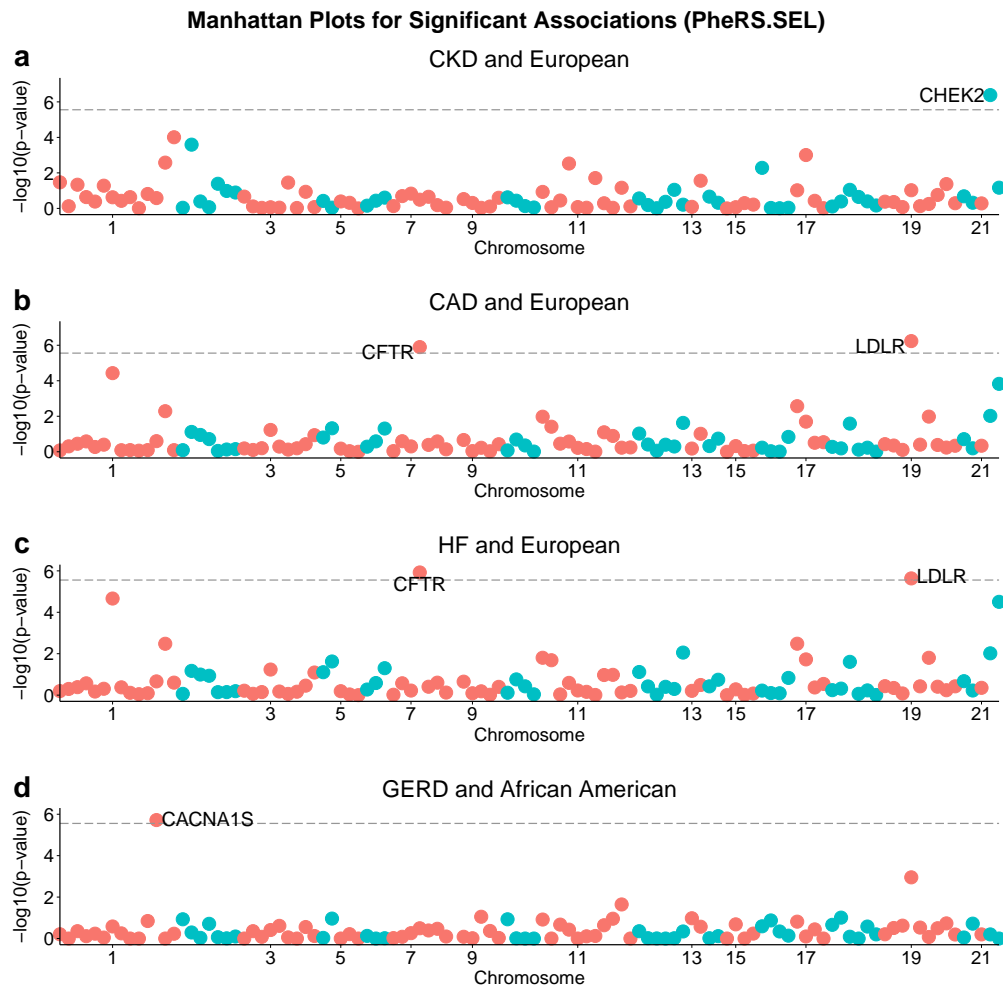

Supplementary Figure 38: **Exome-wide significant gene-based test results for 107 autosomal genes on the eMERGE-seq panel using PheRS with pre-selected phecodes for six diseases.** Results are shown for those phenotypes and ethnic groups with at least one exome-wide significant result. Manhattan plots for **a** CKD, **b** CAD, **c** T2D, **d** HF, **e** Dementia, and **f** GERD. The horizontal line corresponds to exome-wide significance level.

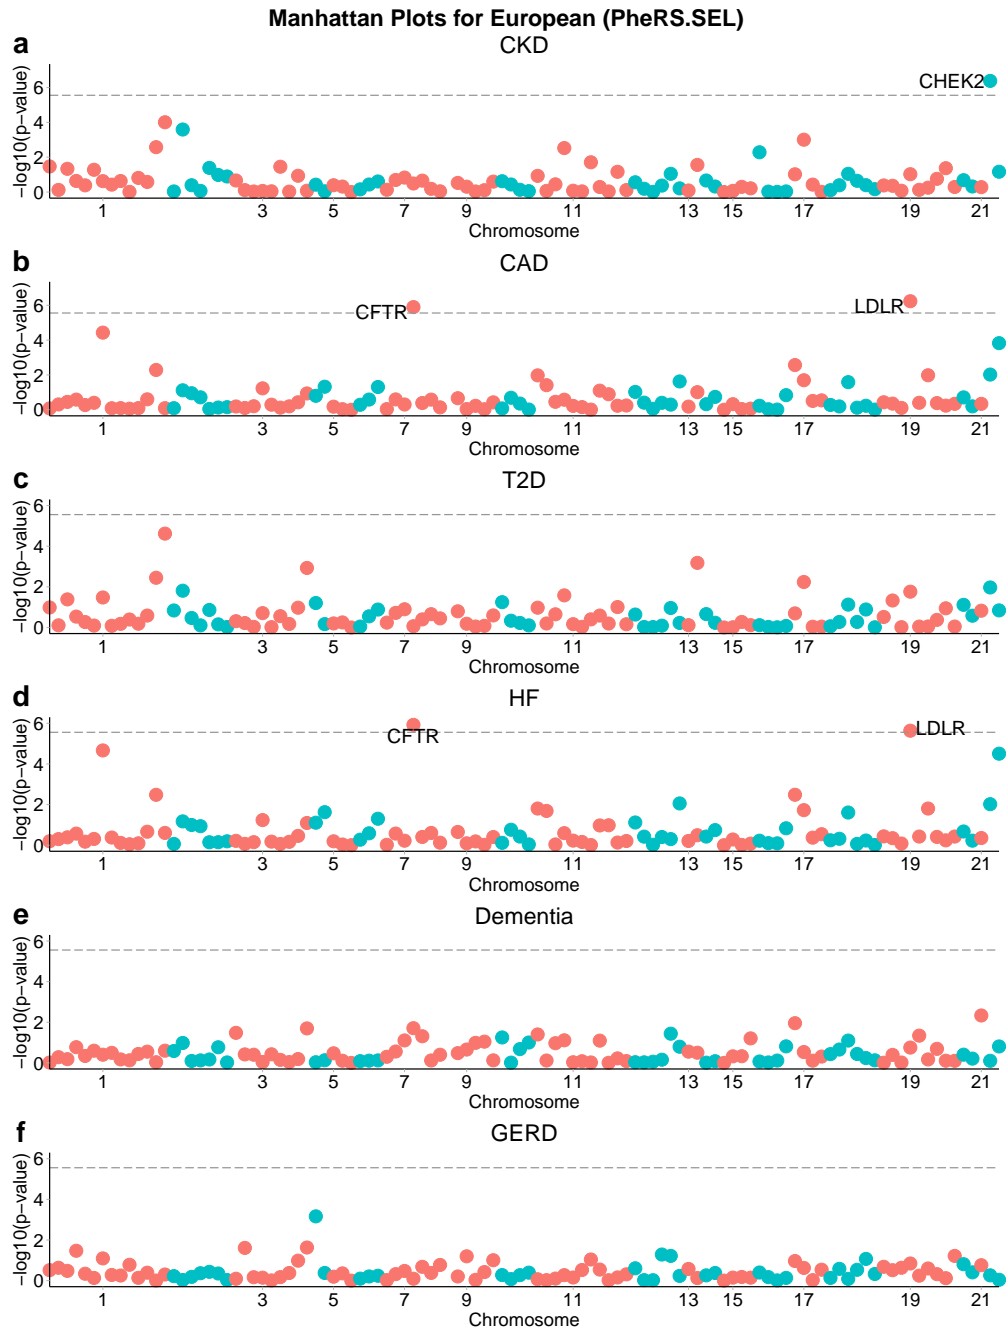

Supplementary Figure 39: **Gene-based test results for the European dataset for 107 autosomal genes on the eMERGE-seq panel using PheRS with pre-selected phecodes for six diseases.** Manhattan plots for **a** CKD, **b** CAD, **c** T2D, **d** HF, **e** Dementia, and **f** GERD. The horizontal line corresponds to exome-wide significance level.

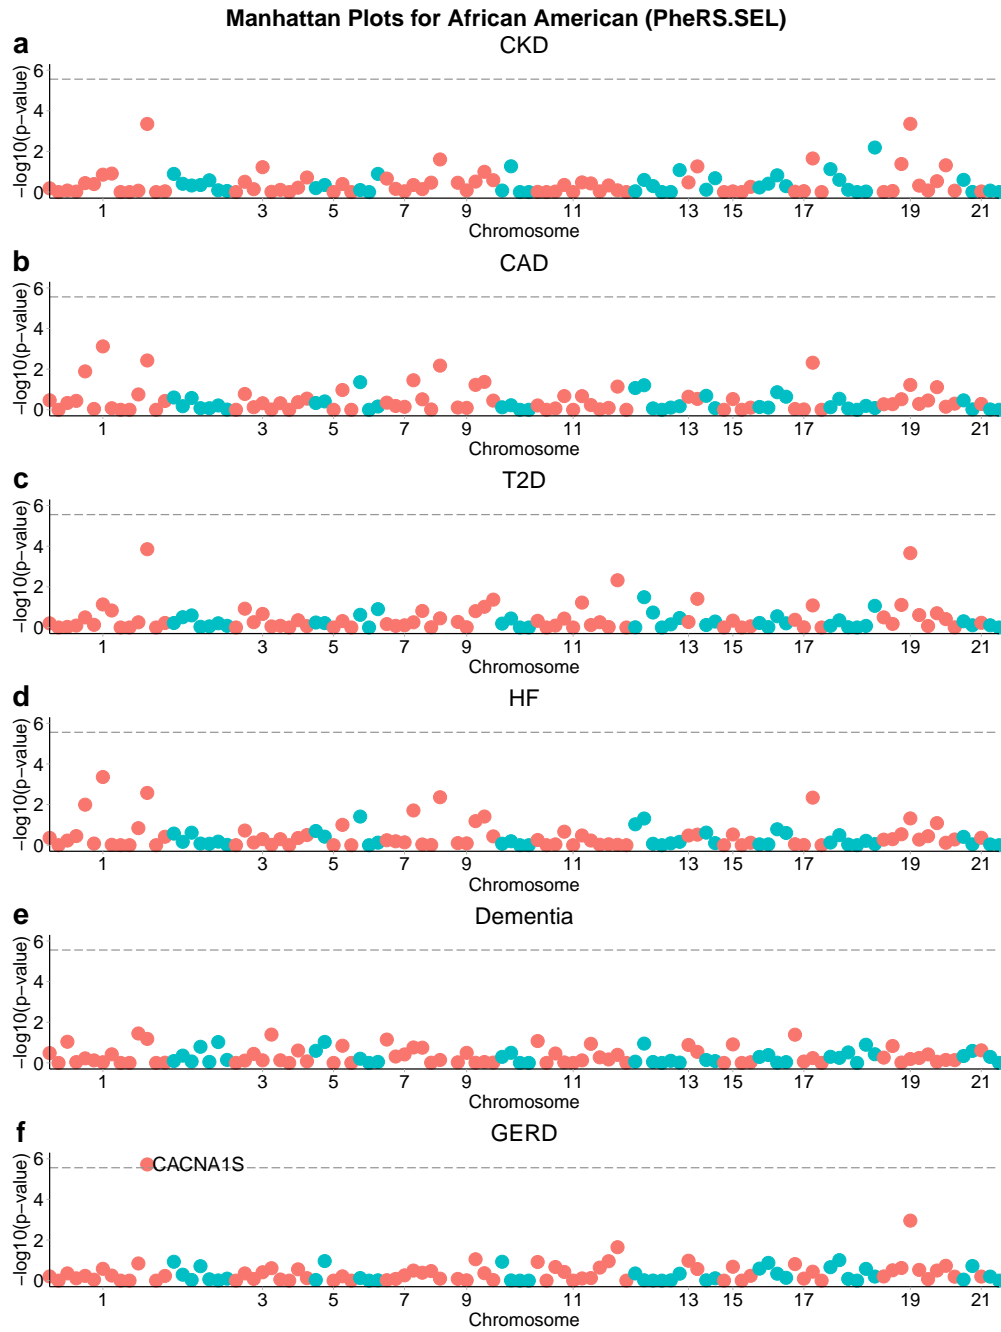

Supplementary Figure 40: **Gene-based test results for the African American dataset for 107 autosomal genes on the eMERGE-seq panel using PheRS with pre-selected phe-codes for six diseases.** Manhattan plots for **a** CKD, **b** CAD, **c** T2D, **d** HF, **e** Dementia, and **f** GERD. The horizontal line corresponds to exome-wide significance level.

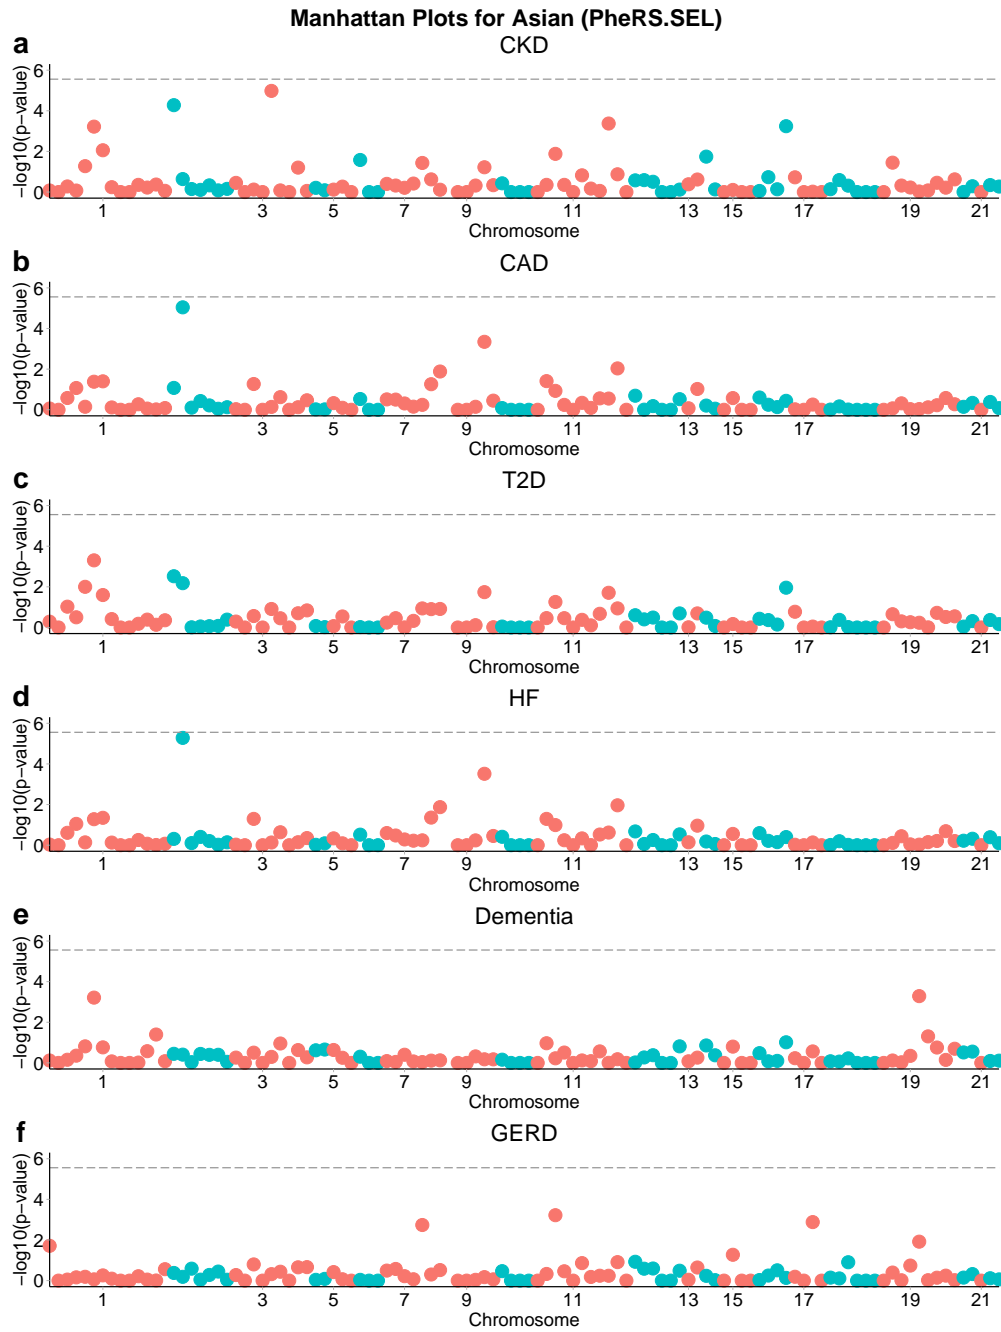

Supplementary Figure 41: **Gene-based test results for the Asian dataset for 107 autosomal genes on the eMERGE-seq panel using PheRS with pre-selected phecodes for six diseases.** Manhattan plots for **a** CKD, **b** CAD, **c** T2D, **d** HF, **e** Dementia, and **f** GERD. The horizontal line corresponds to exome-wide significance level.

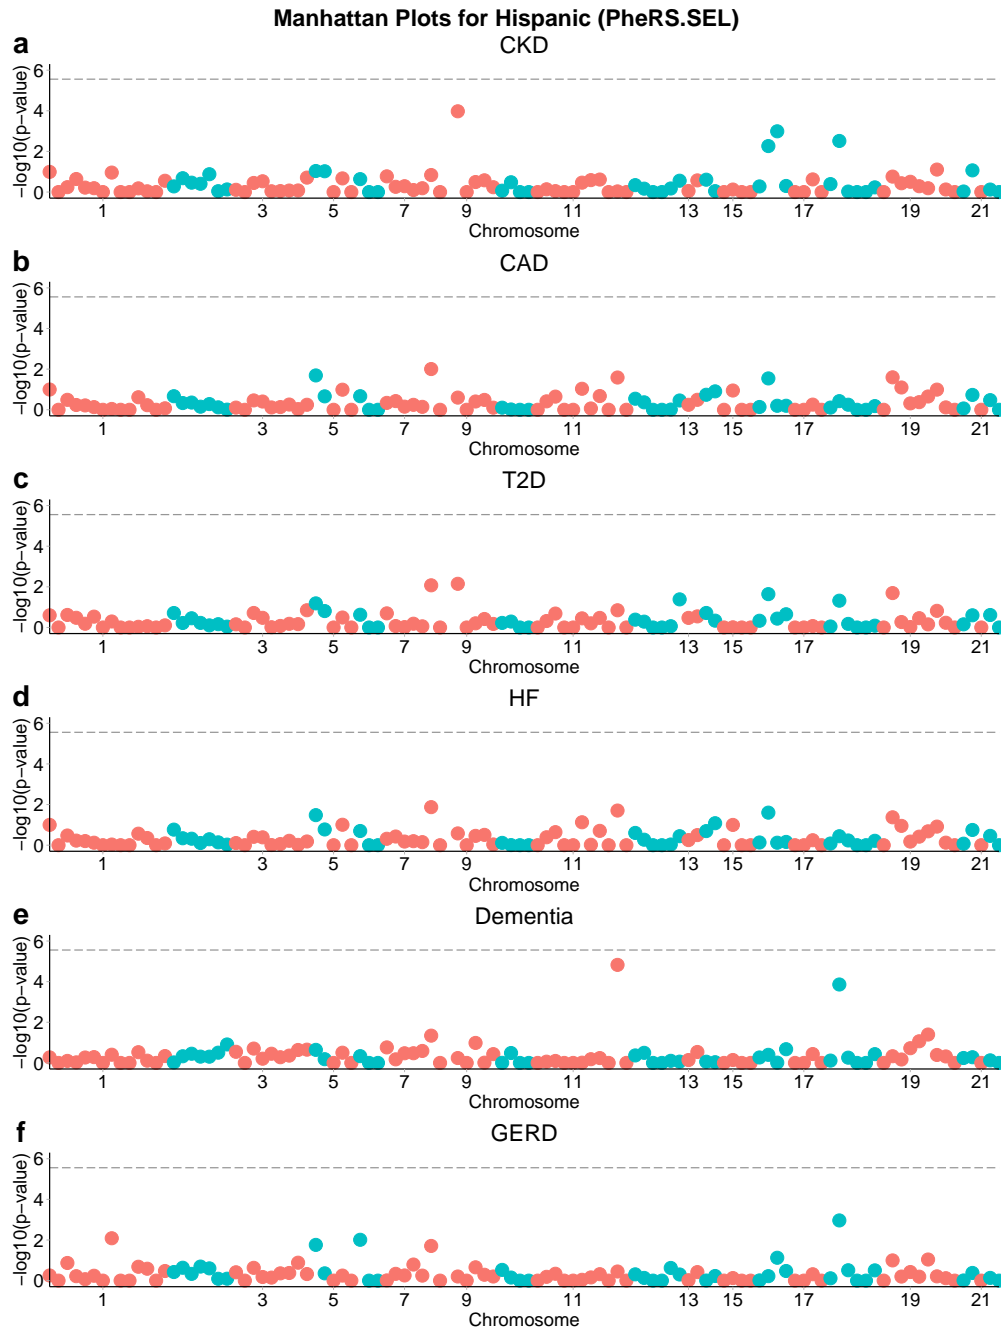

Supplementary Figure 42: **Gene-based test results for the Hispanic dataset for 107 autosomal genes on the eMERGE-seq panel using PheRS with pre-selected phecodes for six diseases.** Manhattan plots for **a** CKD, **b** CAD, **c** T2D, **d** HF, **e** Dementia, and **f** GERD. The horizontal line corresponds to exome-wide significance level.

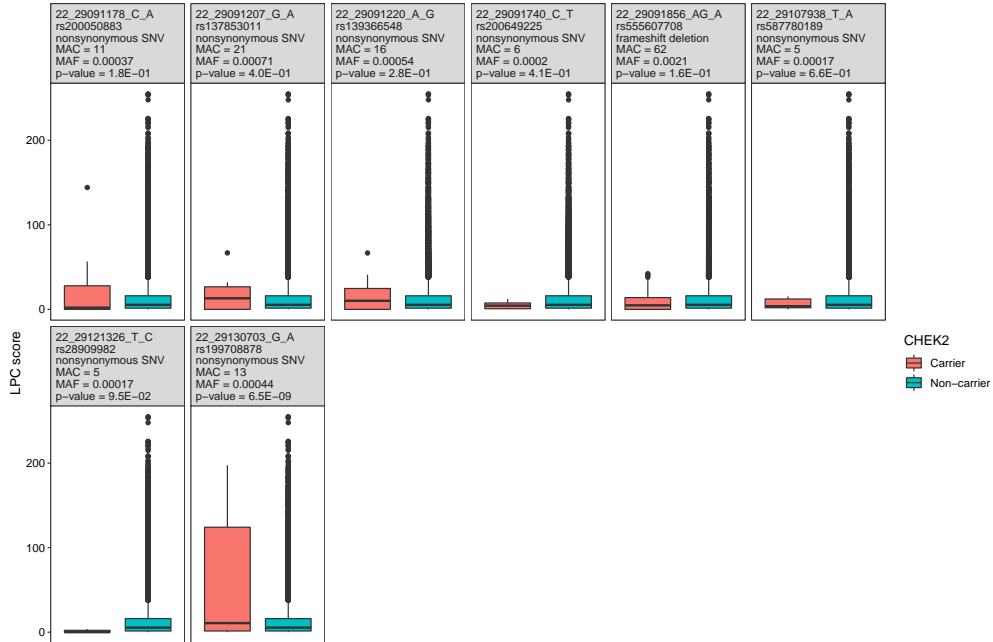

Supplementary Figure 43: Boxplot of CKD LPC scores for carriers vs. non-carriers of rare variants in *CHEK2* (Europeans).

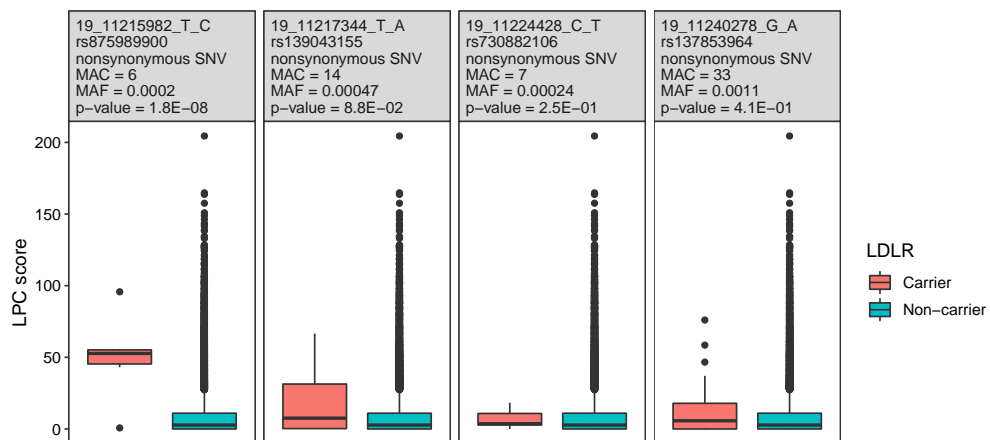

Supplementary Figure 44: Boxplot of CAD LPC scores for carriers vs. non-carriers of rare variants in *LDLR* (Europeans).

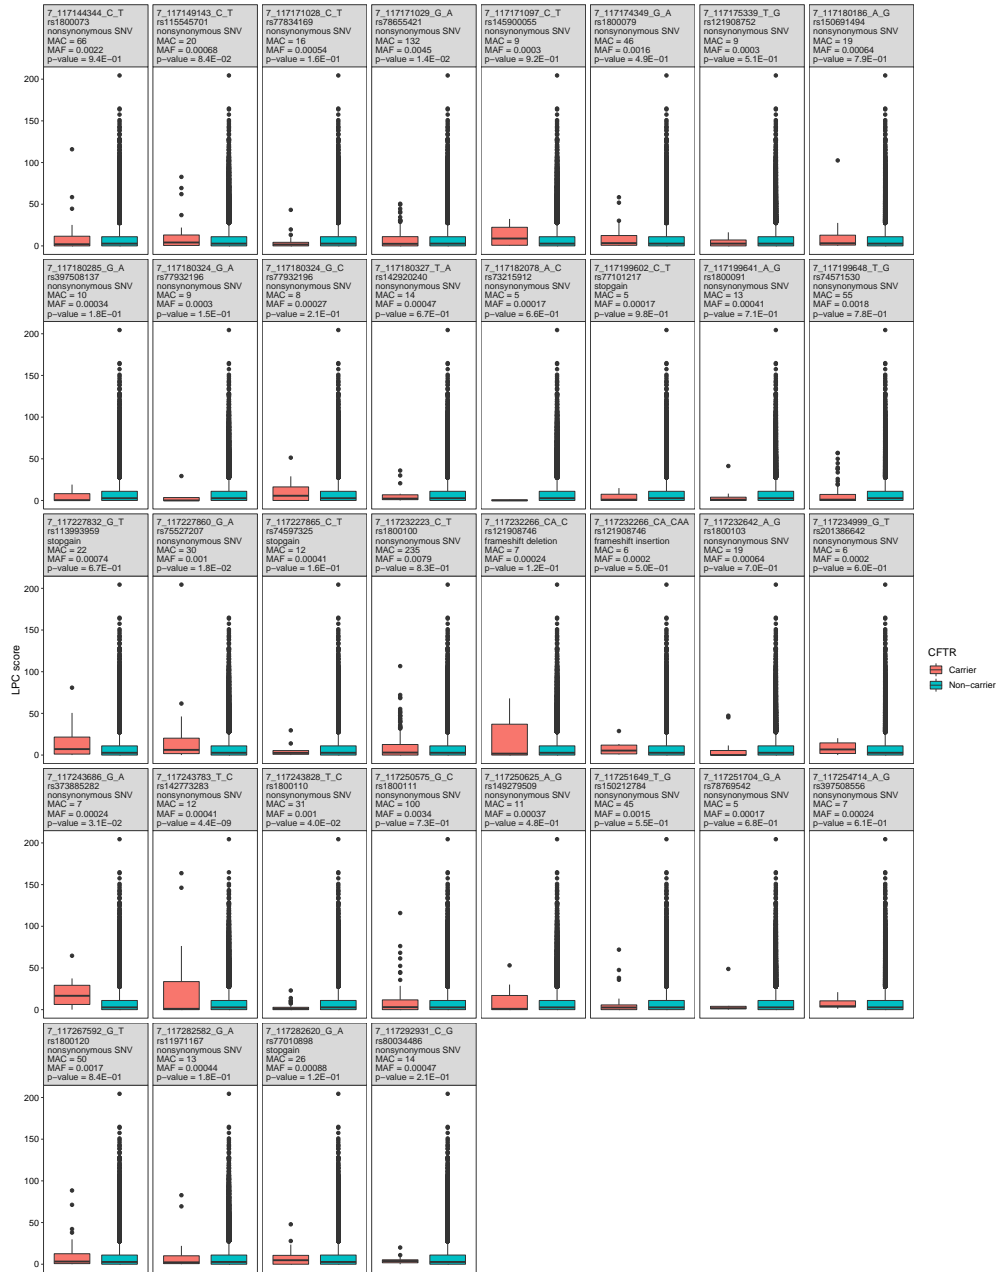

Supplementary Figure 45: Boxplot of CAD LPC scores for carriers vs. non-carriers of rare variants in *CFTR* (Europeans).



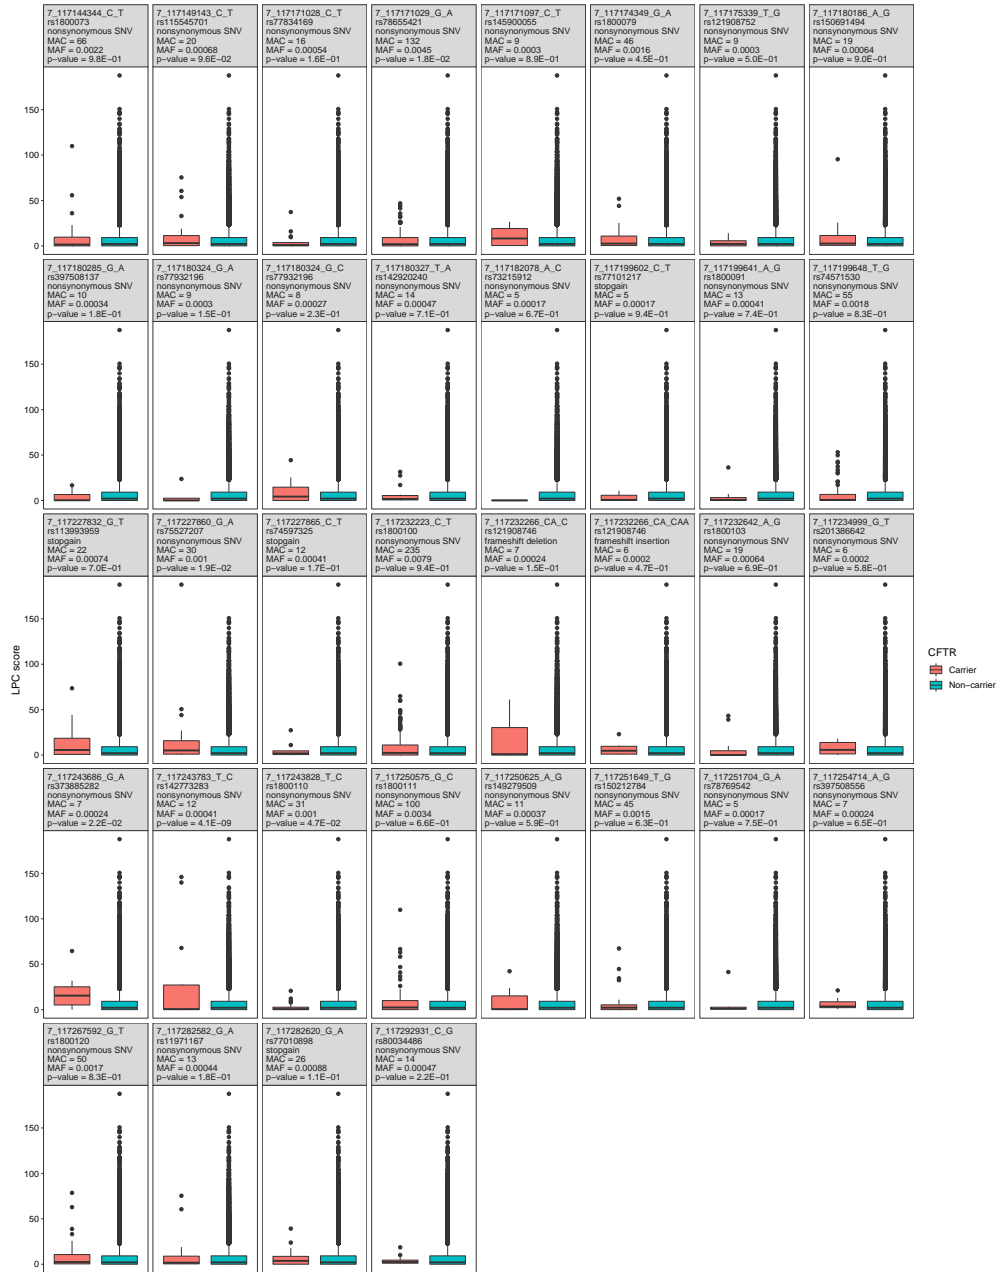

Supplementary Figure 46: Boxplot of HF LPC scores for carriers vs. non-carriers of rare variants in *CFTR* (Europeans).

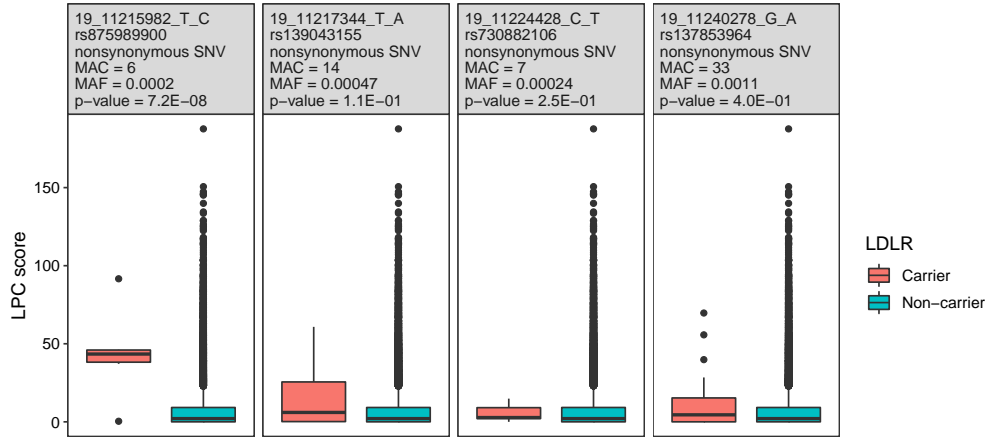

Supplementary Figure 47: **Boxplot of HF LPC scores for carriers vs. non-carriers of rare variants in *LDLR* (Europeans).**

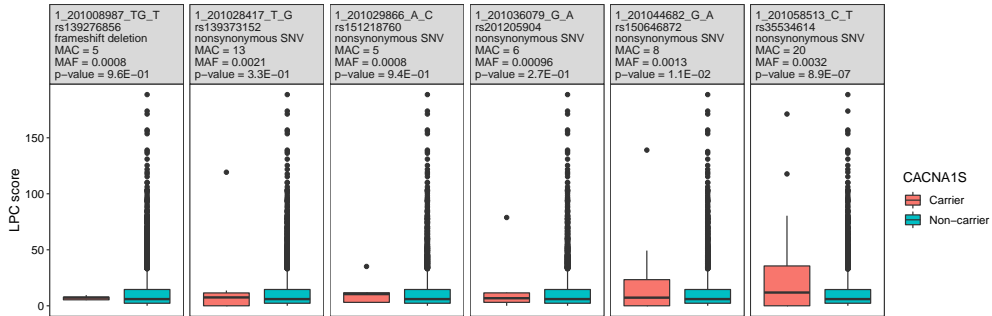

Supplementary Figure 48: **Boxplot of GERD LPC scores for carriers vs. non-carriers of ultra-rare variants in *CACNA1S* (African American).**

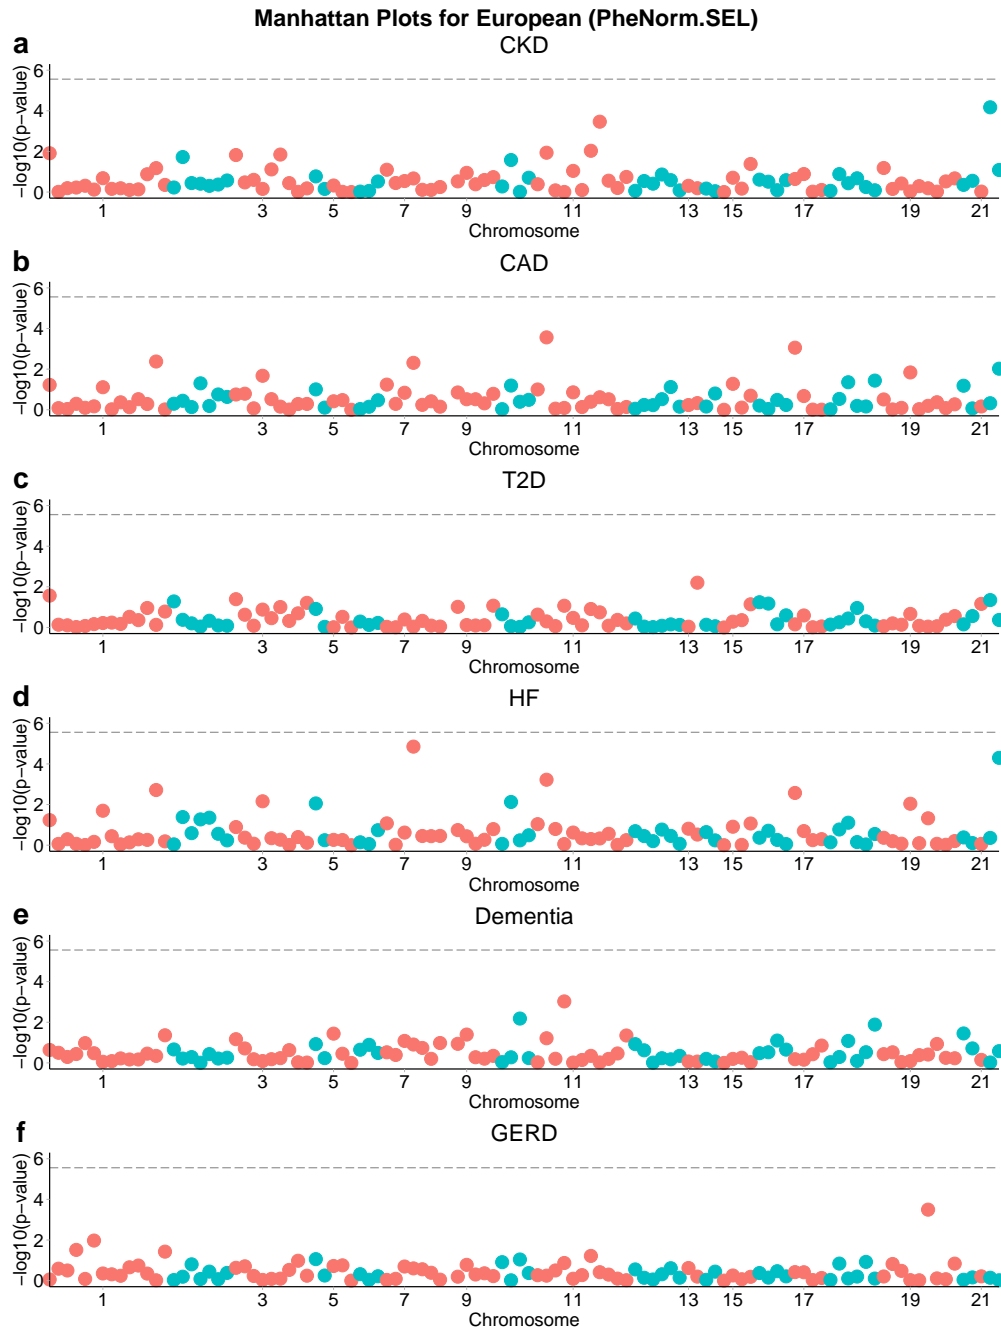

Supplementary Figure 49: **Gene-based test results for the European dataset for 107 autosomal genes on the eMERGE-seq panel using PheNorm with pre-selected phecodes for six diseases.** Manhattan plots for **a** CKD, **b** CAD, **c** T2D, **d** HF, **e** Dementia, and **f** GERD. The horizontal line corresponds to exome-wide significance level.

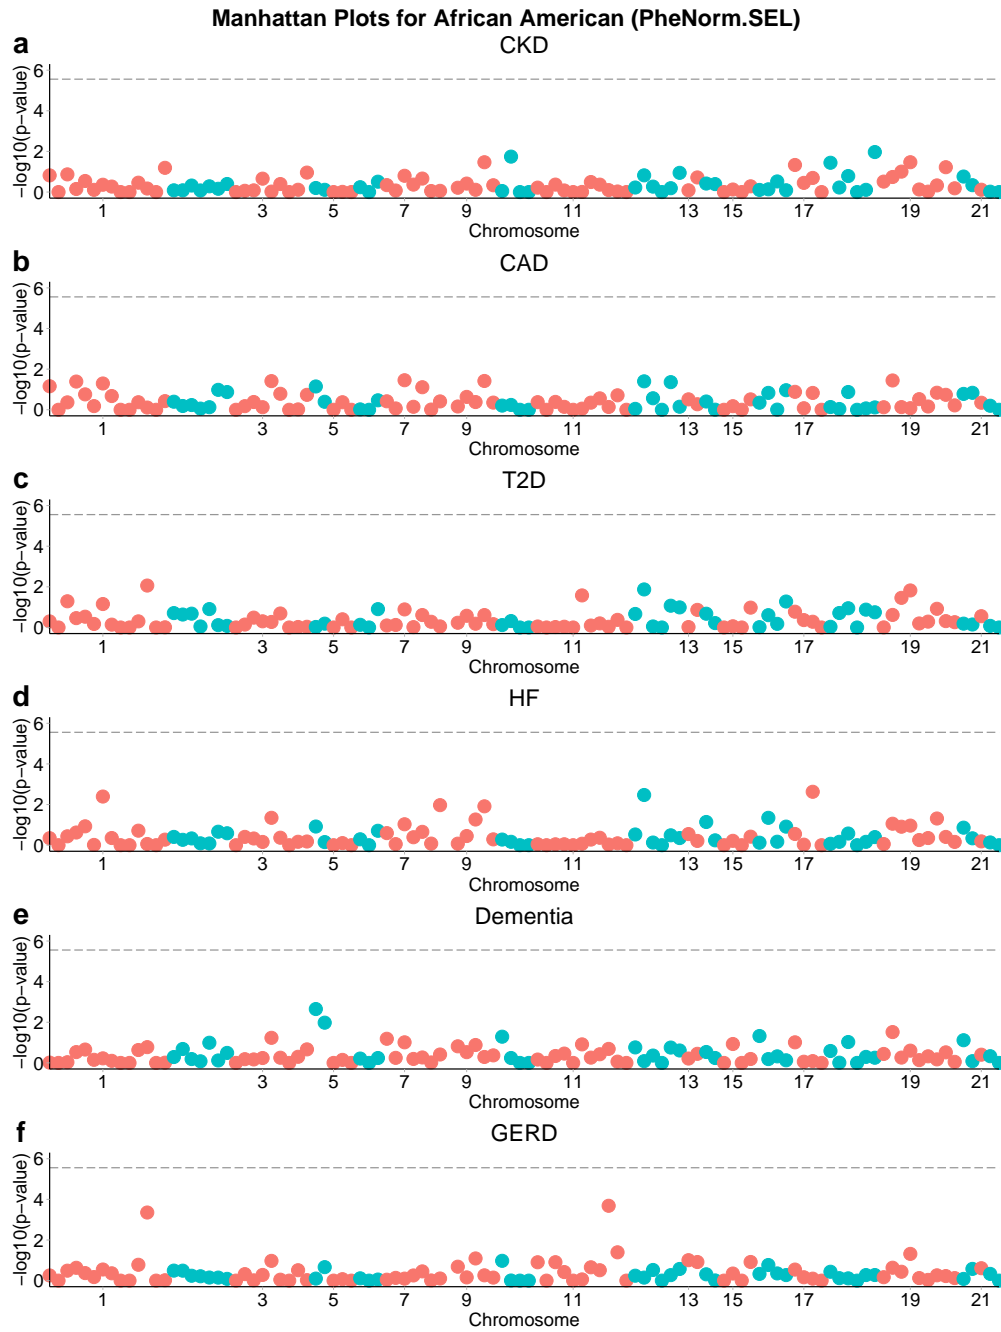

Supplementary Figure 50: **Gene-based test results for the African American for 107 autosomal genes on the eMERGE-seq panel using PheNorm with pre-selected phecodes for six diseases.** Manhattan plots for **a** CKD, **b** CAD, **c** T2D, **d** HF, **e** Dementia, and **f** GERD. The horizontal line corresponds to exome-wide significance level.

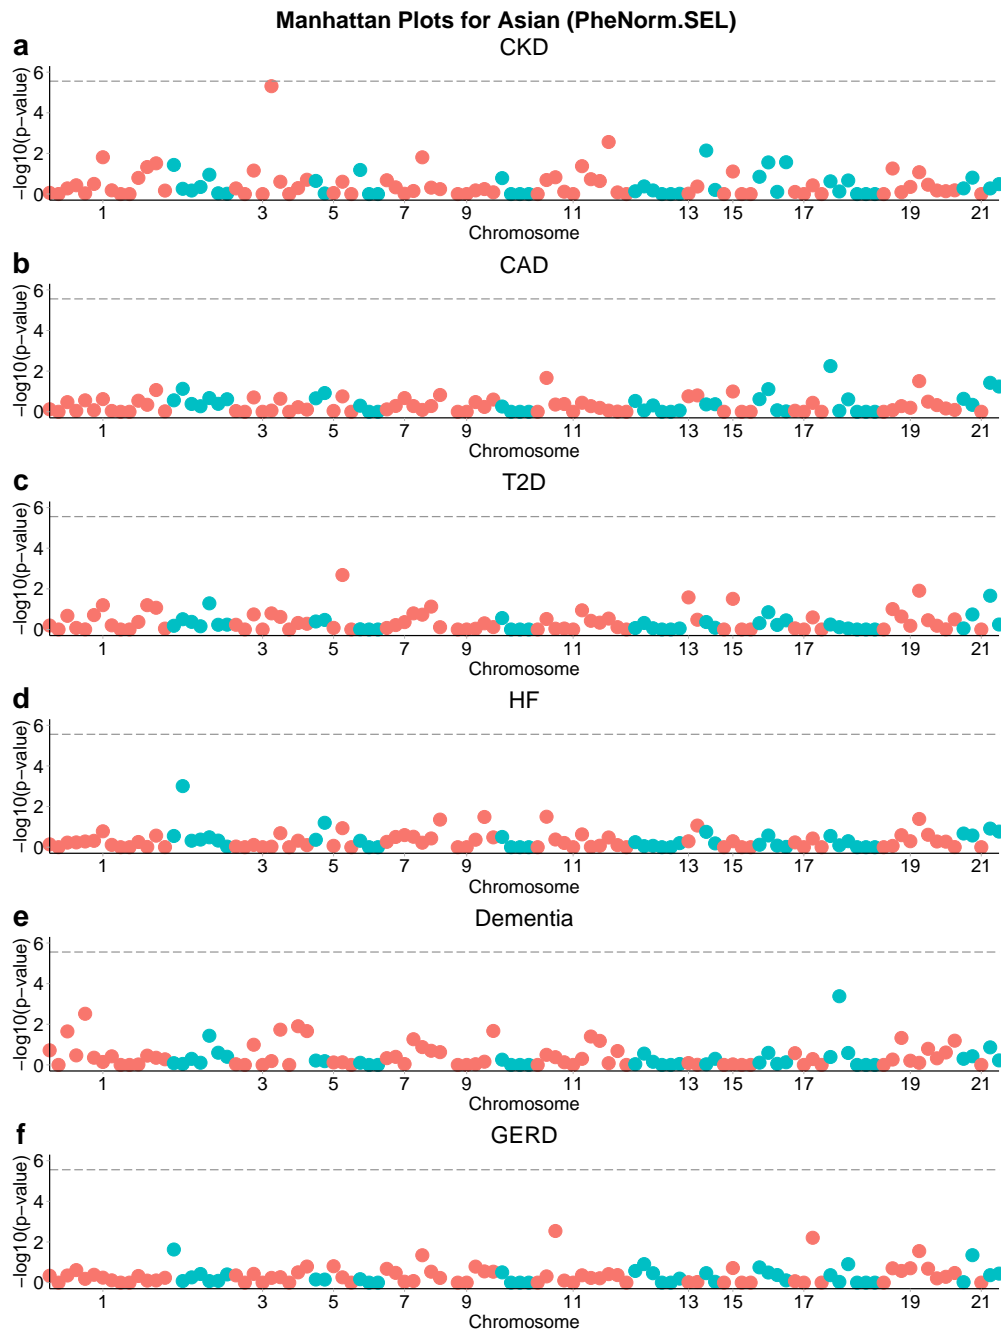

Supplementary Figure 51: **Gene-based test results for the Asian dataset for 107 autosomal genes on the eMERGE-seq panel using PheNorm with pre-selected phecodes for six diseases.** Manhattan plots for **a** CKD, **b** CAD, **c** T2D, **d** HF, **e** Dementia, and **f** GERD. The horizontal line corresponds to exome-wide significance level.

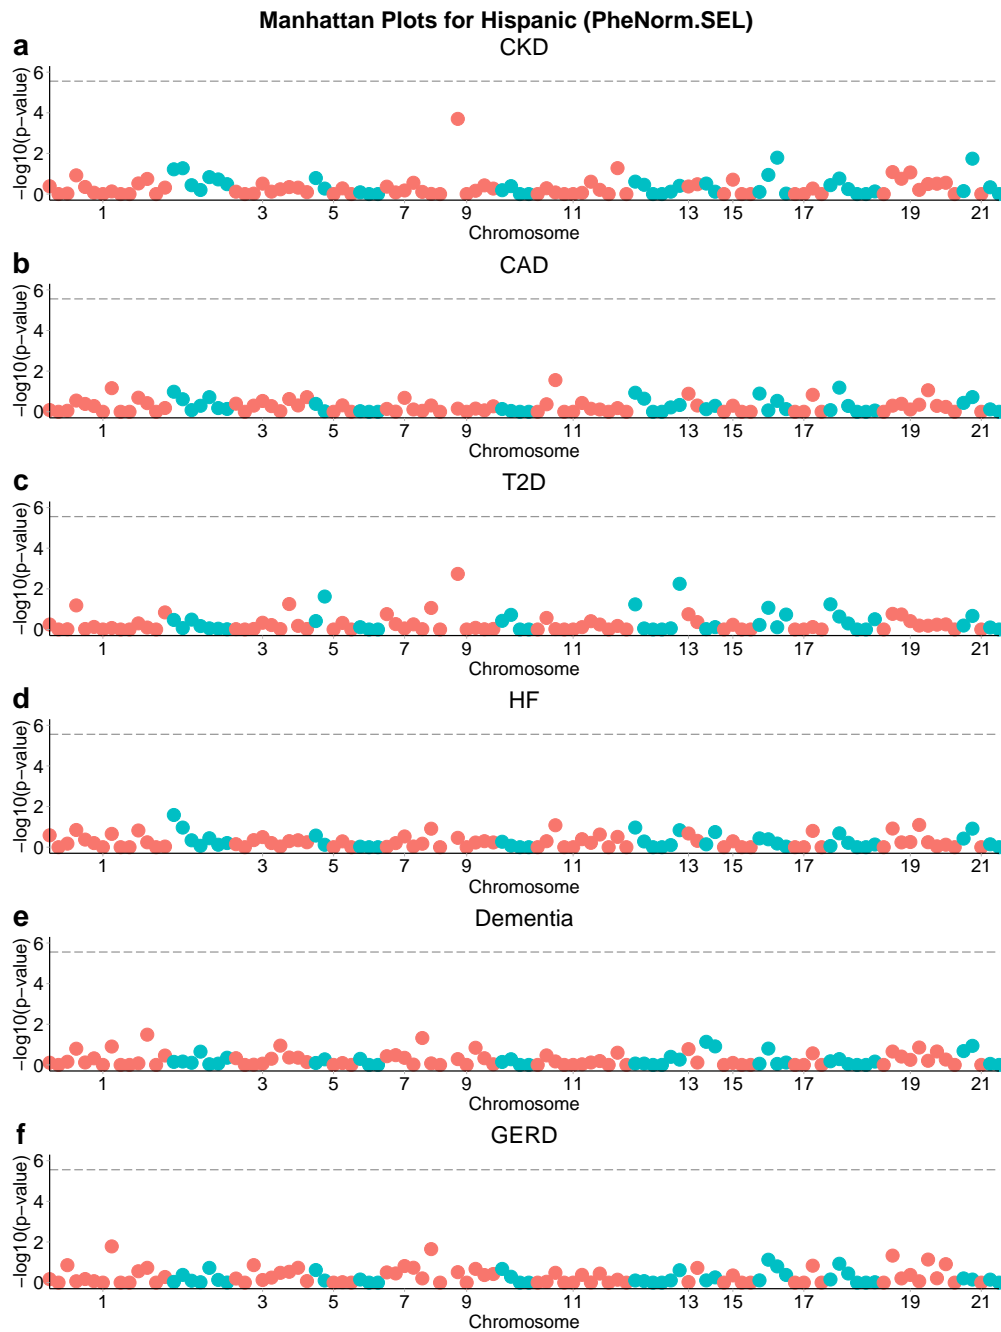

Supplementary Figure 52: **Gene-based test results for the Hispanic dataset for 107 autosomal genes on the eMERGE-seq panel using PheNorm with pre-selected phecodes for six diseases.** Manhattan plots for **a** CKD, **b** CAD, **c** T2D, **d** HF, **e** Dementia, and **f** GERD. The horizontal line corresponds to exome-wide significance level.

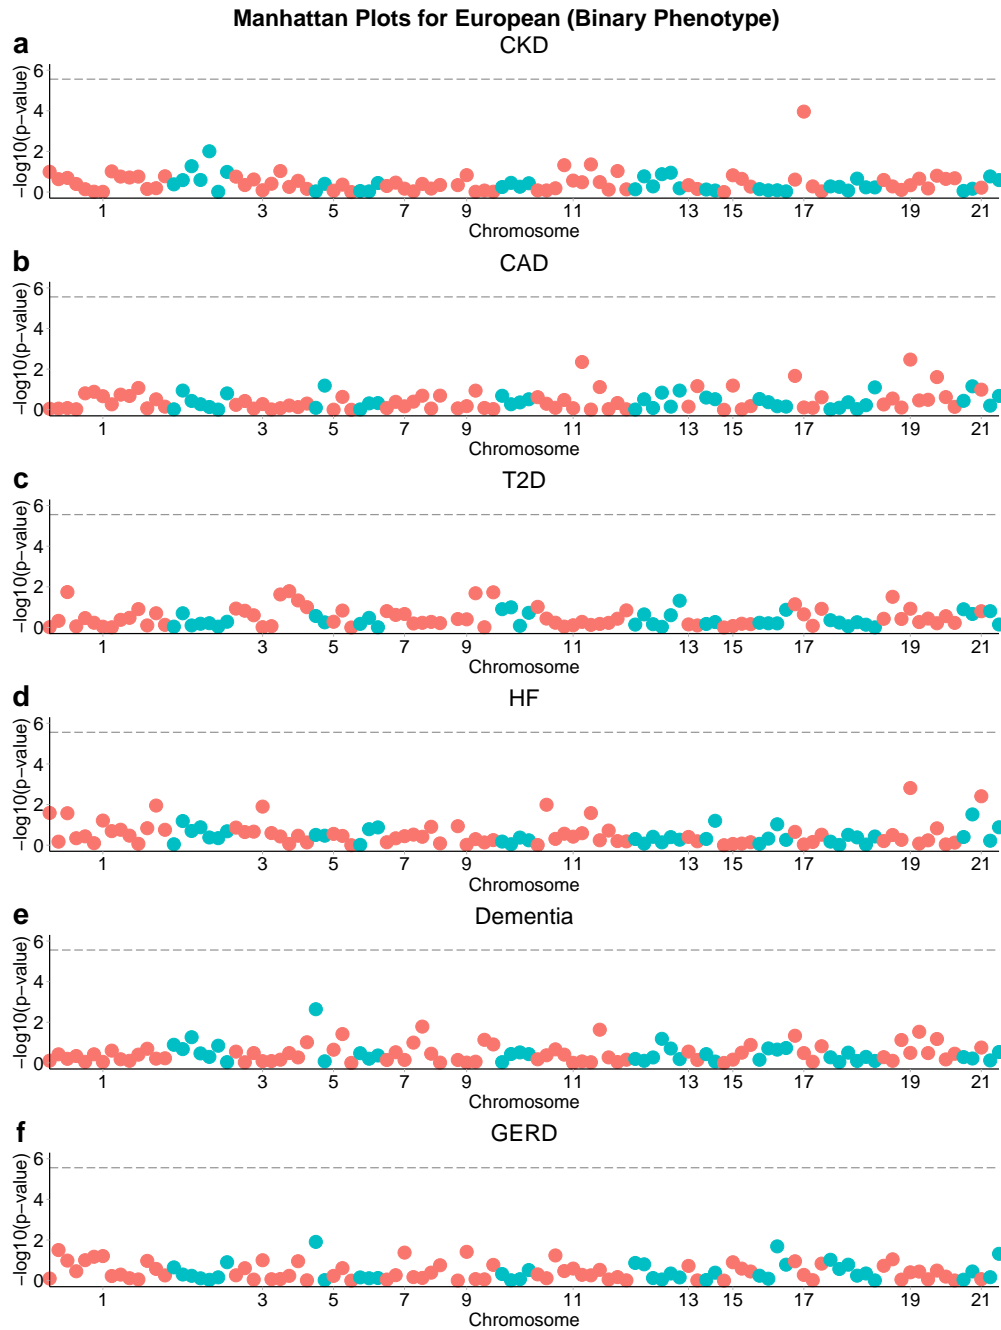

Supplementary Figure 53: **Gene-based test results for the European dataset for 107 autosomal genes on the eMERGE-seq panel using a binary trait defined by phecodes for six diseases.** Manhattan plots for **a** CKD, **b** CAD, **c** T2D, **d** HF, **e** Dementia, and **f** GERD. The horizontal line corresponds to exome-wide significance level.

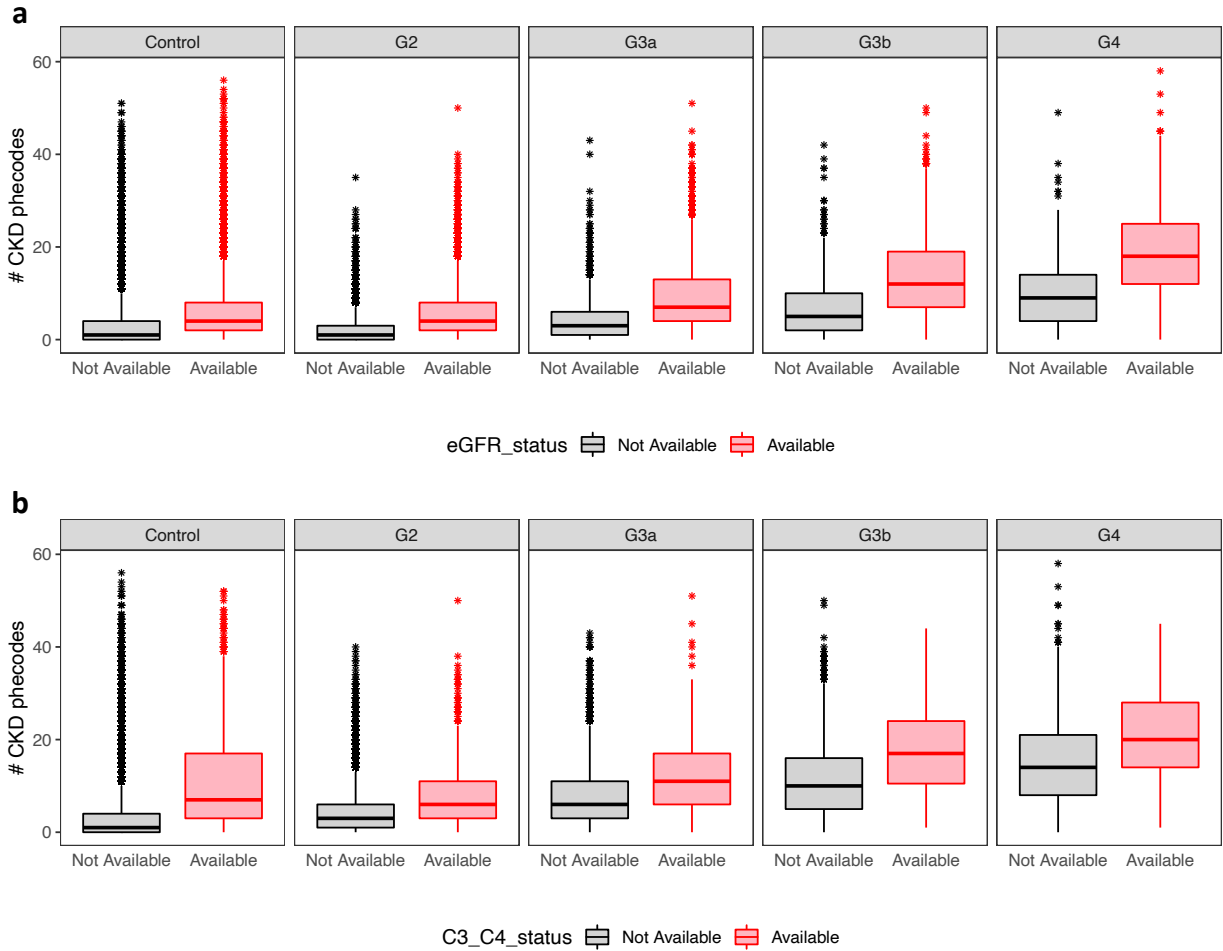

Supplementary Figure 54: **CKD related phecodes and presence of laboratory values.** a Burden of CKD related phecodes in individuals with eGFR slope available vs. not available; bf b Burden of CKD related phecodes in individuals with C3/C4 available vs. not available.



## Supplementary Tables

Supplementary Table 1: **The number of phecodes with non-zero prevalence in the eMERGE dataset for each category.**

| Category                | # phecodes |
|-------------------------|------------|
| Genitourinary           | 175        |
| Circulatory system      | 172        |
| Endocrine/metabolic     | 169        |
| Digestive               | 166        |
| Neoplasms               | 141        |
| Musculoskeletal         | 132        |
| Sense organs            | 128        |
| Injuries & poisonings   | 126        |
| Dermatologic            | 96         |
| Respiratory             | 85         |
| Neurological            | 84         |
| Mental disorders        | 76         |
| Hematopoietic           | 62         |
| Pregnancy complications | 58         |
| Congenital anomalies    | 56         |
| Symptoms                | 50         |
| Infectious diseases     | 23         |
| NULL                    | 18         |

Supplementary Table 2: **Phecodes that are used to define cases for phenotypes (at least one occurrence) in eMERGE dataset.** These phecodes are excluded from the derivation of the LPC scores, when evaluating the predictive performance on test data.

| Phenotype | Phecode | Description                                                              |
|-----------|---------|--------------------------------------------------------------------------|
| CKD       | 585.3   | Chronic renal failure [CKD]                                              |
|           | 585.31  | Renal dialysis                                                           |
|           | 585.32  | End stage renal disease                                                  |
|           | 585.33  | Chronic Kidney Disease, Stage III                                        |
|           | 585.34  | Chronic Kidney Disease, Stage IV                                         |
|           | 585.4   | Chronic kidney disease, Stage I or II                                    |
| CAD       | 411.2   | Myocardial infarction                                                    |
|           | 414     | Other forms of chronic heart disease                                     |
| T2D       | 250     | Diabetes mellitus                                                        |
|           | 250.2   | Type 2 diabetes                                                          |
|           | 250.21  | Type 2 diabetes with ketoacidosis                                        |
|           | 250.22  | Type 2 diabetes with renal manifestations                                |
|           | 250.23  | Type 2 diabetes with ophthalmic manifestations                           |
|           | 250.24  | Type 2 diabetes with neurological manifestations                         |
|           | 250.25  | Diabetes type 2 with peripheral circulatory disorders                    |
| HF        | 428     | Congestive heart failure; nonhypertensive                                |
|           | 428.1   | Congestive heart failure (CHF) NOS                                       |
|           | 428.2   | Heart failure NOS                                                        |
|           | 428.3   | Heart failure with reduced EF [Systolic or combined heart failure]       |
|           | 428.4   | Heart failure with preserved EF [Diastolic heart failure]                |
| Dementia  | 290     | Delirium dementia and amnestic and other cognitive disorders             |
|           | 290.1   | Dementias                                                                |
|           | 290.11  | Alzheimer's disease                                                      |
|           | 290.12  | Dementia with cerebral degenerations                                     |
|           | 290.13  | Senile dementia                                                          |
|           | 290.16  | Vascular dementia                                                        |
|           | 290.2   | Delirium due to conditions classified elsewhere                          |
|           | 317.1   | Alcoholism                                                               |
|           | 292.2   | Mild cognitive impairment                                                |
|           | 317     | Alcohol-related disorders                                                |
|           | 290.3   | Other persistent mental disorders due to conditions classified elsewhere |
| GERD      | 530.1   | Esophagitis, GERD and related diseases                                   |
|           | 530.11  | GERD                                                                     |
|           | 530.14  | Reflux esophagitis                                                       |

Supplementary Table 3: **The choice of ‘relevant’ phecodes.** AUROC and AUPRC for different sets of T2D feature phecodes that include (1) 152 phecodes with p-value  $< 10^{-5}$  in logistic regression on PRS, (2) 140 phecodes that are manually selected by experts, (3) 132 phecodes are in the intersection of the previous two sets. The case defining phecodes are excluded.

| # phecodes  | AUROC  |        |        | AUPRC  |        |        |
|-------------|--------|--------|--------|--------|--------|--------|
|             | 152    | 140    | 132    | 152    | 140    | 132    |
| PheRS.SEL   | 0.7377 | 0.7473 | 0.7492 | 0.5397 | 0.5533 | 0.5563 |
| LPC.SEL     | 0.7765 | 0.7658 | 0.7644 | 0.5974 | 0.5863 | 0.5904 |
| PheNorm.SEL | 0.7470 | 0.7592 | 0.7599 | 0.6512 | 0.6653 | 0.6650 |

Supplementary Table 4: **P-values for the replication of discovered variants in different populations.** The nominally significant p-values from replication cohorts are highlighted in bold.

| Ethnicity                        | Phenotype | Gene    | European         | African American | Asian     | Hispanic   |
|----------------------------------|-----------|---------|------------------|------------------|-----------|------------|
| LPC with pre-selected phecodes   |           |         |                  |                  |           |            |
| European                         | CKD       | LDLR    | 1.530E-06        | <b>1.431E-03</b> | 9.341E-01 | 8.565E-01  |
| European                         | CAD       | LDLR    | 7.852E-10        | 1.760E-01        | 9.822E-01 | 3.386E-01  |
| European                         | HF        | NF2     | 1.009E-06        | NA               | 6.118E-01 | NA         |
| African American                 | HF        | LMNA    | <b>5.987E-04</b> | 2.680E-06        | 7.488E-02 | NA         |
| Asian                            | CKD       | APOB    | 8.904E-01        | 3.329E-01        | 1.006E-07 | 4.180E-01  |
| PheRS with pre-selected phecodes |           |         |                  |                  |           |            |
| Ethnicity                        | Phenotype | Gene    | p.European       | p.African        | p.Asian   | p.Hispanic |
| European                         | CKD       | CHEK2   | 4.13E-07         | 8.49E-01         | 4.53E-01  | 7.52E-01   |
| European                         | CAD       | CFTR    | 1.27E-06         | <b>3.53E-02</b>  | 7.03E-01  | 5.71E-01   |
| European                         | CAD       | LDLR    | 5.82E-07         | 5.98E-02         | 9.31E-01  | 4.85E-01   |
| European                         | HF        | CFTR    | 1.19E-06         | <b>1.95E-02</b>  | 6.00E-01  | 6.34E-01   |
| European                         | HF        | LDLR    | 2.31E-06         | <b>4.81E-02</b>  | 9.10E-01  | 6.65E-01   |
| African American                 | GERD      | CACNA1S | 4.07E-01         | 1.91E-06         | 8.89E-01  | 2.60E-01   |

Supplementary Table 5: **Number of individuals (cases vs. controls) for four ethnic groups in the eMERGE-seq dataset.** Cases/Controls are defined based on presence/absence of specific phecodes as explained in the text.

| Population       | Phenotype | Total  | Case  | Control | Control/Case Imbalance |
|------------------|-----------|--------|-------|---------|------------------------|
| European         | CKD       | 14,813 | 1,806 | 13,007  | 7.2                    |
|                  | CAD       | 14,813 | 1,565 | 13,248  | 8.5                    |
|                  | T2D       | 14,813 | 2,567 | 12,246  | 4.8                    |
|                  | HF        | 14,813 | 1,328 | 13,485  | 10.2                   |
|                  | Dementia  | 14,813 | 1,442 | 13,371  | 9.3                    |
|                  | GERD      | 14,813 | 5,487 | 9,326   | 1.7                    |
| African American | CKD       | 3,110  | 356   | 2,754   | 7.7                    |
|                  | CAD       | 3,110  | 164   | 2,946   | 18                     |
|                  | T2D       | 3,110  | 427   | 2,683   | 6.3                    |
|                  | HF        | 3,110  | 189   | 2,921   | 15.5                   |
|                  | Dementia  | 3,110  | 194   | 2,916   | 15                     |
|                  | GERD      | 3,110  | 850   | 2,260   | 2.7                    |
| Asian            | CKD       | 1,437  | 145   | 1,292   | 8.9                    |
|                  | CAD       | 1,437  | 65    | 1,372   | 21.1                   |
|                  | T2D       | 1,437  | 210   | 1,227   | 5.8                    |
|                  | HF        | 1,437  | 47    | 1,390   | 29.6                   |
|                  | Dementia  | 1,437  | 41    | 1,396   | 34                     |
|                  | GERD      | 1,437  | 371   | 1,066   | 2.9                    |
| Hispanic         | CKD       | 1,301  | 284   | 1,017   | 3.6                    |
|                  | CAD       | 1,301  | 128   | 1,173   | 9.2                    |
|                  | T2D       | 1,301  | 340   | 961     | 2.8                    |
|                  | HF        | 1,301  | 143   | 1,158   | 8.1                    |
|                  | Dementia  | 1,301  | 122   | 1,179   | 9.7                    |
|                  | GERD      | 1,301  | 468   | 833     | 1.8                    |

Supplementary Table 6: **Genes showing significant association with at least one disease using LPC and PheRS with pre-selected phecodes.** The p values from the combined test (p.all), the tests including only common variants (p.common), and tests including only rare variants (p.rare), as well as individual tests in the overall combined test are also reported, where the smallest individual test p value for each gene is in bold. No exome-wide significant results were identified for PheNorm.

| Ethnicity                        | Disease | Gene    | p.all     | p.common  | p.rare    | p.burden         |                             |                             |                                 |                   | p.dispersion |                             |                             |                                 |                   | p.singleCauchy       |            |
|----------------------------------|---------|---------|-----------|-----------|-----------|------------------|-----------------------------|-----------------------------|---------------------------------|-------------------|--------------|-----------------------------|-----------------------------|---------------------------------|-------------------|----------------------|------------|
|                                  |         |         |           |           |           | MAC < 5          | MAF < 0.01 & MAC ≥ 5 & Beta | MAF < 0.01 & MAC ≥ 5 & CADD | MAF < 0.01 & MAC ≥ 5 & Polyphen | MAF ≥ 0.01 & Beta | MAC < 5      | MAF < 0.01 & MAC ≥ 5 & Beta | MAF < 0.01 & MAC ≥ 5 & CADD | MAF < 0.01 & MAC ≥ 5 & Polyphen | MAF ≥ 0.01 & Beta | MAF < 0.01 & MAC ≥ 5 | MAF ≥ 0.01 |
| LPC with pre-selected phecodes   |         |         |           |           |           |                  |                             |                             |                                 |                   |              |                             |                             |                                 |                   |                      |            |
| European                         | CKD     | LDLR    | 1.530E-06 | NA        | 1.530E-06 | 1.108E-02        | 5.219E-02                   | NA                          | 8.189E-02                       | 5.604E-02         | NA           | 2.097E-02                   | NA                          | 2.551E-02                       | 2.228E-02         | <b>1.912E-07</b>     | NA         |
| European                         | CAD     | LDLR    | 7.852E-10 | NA        | 7.852E-10 | 1.620E-04        | 1.856E-02                   | NA                          | 3.238E-02                       | 2.042E-02         | NA           | 1.440E-03                   | NA                          | 3.078E-03                       | 1.783E-03         | <b>9.815E-11</b>     | NA         |
| European                         | HF      | NF2     | 1.009E-06 | NA        | 1.009E-06 | <b>1.009E-06</b> | NA                          | NA                          | NA                              | NA                | NA           | NA                          | NA                          | NA                              | NA                | NA                   | NA         |
| African American                 | HF      | LMNA    | 2.680E-06 | NA        | 2.680E-06 | <b>3.351E-07</b> | 2.582E-01                   | NA                          | 2.361E-01                       | 2.576E-01         | NA           | 1.377E-01                   | NA                          | 9.463E-02                       | 1.364E-01         | 4.369E-01            | NA         |
| Asian                            | CKD     | APOB    | 1.006E-07 | 6.146E-01 | 7.317E-08 | 3.807E-01        | 3.581E-01                   | 6.071E-01                   | 2.646E-01                       | 3.721E-01         | NA           | 3.576E-07                   | 6.291E-01                   | 3.877E-08                       | 4.843E-07         | <b>1.271E-08</b>     | 6.071E-01  |
| PheRS with pre-selected phecodes |         |         |           |           |           |                  |                             |                             |                                 |                   |              |                             |                             |                                 |                   |                      |            |
| European                         | CKD     | CHEK2   | 4.128E-07 | NA        | 4.128E-07 | 2.352E-01        | 9.822E-01                   | NA                          | 7.871E-01                       | 9.446E-01         | NA           | 2.288E-03                   | NA                          | 2.044E-02                       | 1.122E-02         | <b>5.160E-08</b>     | NA         |
| European                         | CAD     | LDLR    | 5.816E-07 | NA        | 5.816E-07 | 2.605E-03        | 1.003E-01                   | NA                          | 1.458E-01                       | 1.068E-01         | NA           | 2.143E-02                   | NA                          | 2.430E-02                       | 2.265E-02         | <b>7.271E-08</b>     | NA         |
| European                         | CAD     | CFTR    | 1.266E-06 | NA        | 1.266E-06 | 8.737E-01        | 7.333E-01                   | NA                          | 5.974E-01                       | 7.019E-01         | NA           | 3.906E-02                   | NA                          | 8.787E-02                       | 6.020E-02         | <b>1.582E-07</b>     | NA         |
| European                         | HF      | CFTR    | 1.189E-06 | NA        | 1.189E-06 | 8.866E-01        | 7.233E-01                   | NA                          | 5.785E-01                       | 6.883E-01         | NA           | 5.001E-02                   | NA                          | 1.056E-01                       | 7.486E-02         | <b>1.487E-07</b>     | NA         |
| European                         | HF      | LDLR    | 2.306E-06 | NA        | 2.306E-06 | 2.360E-03        | 1.379E-01                   | NA                          | 1.925E-01                       | 1.459E-01         | NA           | 2.577E-02                   | NA                          | 2.800E-02                       | 2.696E-02         | <b>2.883E-07</b>     | NA         |
| African American                 | GERD    | CACNA1S | 1.907E-06 | 2.455E-01 | 1.387E-06 | 5.239E-02        | 4.571E-06                   | 3.367E-01                   | 9.937E-06                       | 3.334E-06         | NA           | 6.032E-07                   | 2.849E-01                   | 6.623E-07                       | <b>5.580E-07</b>  | 5.321E-06            | 1.676E-01  |
